# Supplementary material
Source: PubMed Central journal article supplement (PMC4507185)
Supplement: pnas.1504447112.sapp.pdf [file pnas.1504447112.sapp.pdf]

## SUPPLEMENTARY MATERIAL

### ORIGIN AND DYNAMICS OF ADMIXTURE IN BRAZILIANS AND ITS EFFECT ON THE PATTERN OF DELETERIOUS MUTATIONS

Fernanda S. G. Kehdy<sup>a,1</sup>, Mateus H. Gouveia<sup>a,1</sup>, Moara Machado<sup>a,1</sup>, Wagner C. S. Magalhães<sup>a,1</sup>, Andrea R. Horimoto<sup>b</sup>, Bernardo L. Horta<sup>c</sup>, Rennan G. Moreira<sup>a</sup>, Thiago P. Leal<sup>a</sup>, Marília O. Scliar<sup>a</sup>, Giordano B. Soares-Souza<sup>a</sup>, Fernanda Rodrigues-Soares<sup>a</sup>, Gilderlanio S. Araújo<sup>a</sup>, Roxana Zamudio<sup>a</sup>, Hanaisa P. Sant Anna<sup>a</sup>, Hadassa C. Santos<sup>b</sup>, Nubia E. Duarte<sup>b</sup>, Rosemeire L. Fiaccone<sup>d</sup>, Camila A. Figueiredo<sup>e</sup>, Thiago M. Silva<sup>f</sup>, Gustavo N. O. Costa<sup>f</sup>, Sandra Beleza<sup>g</sup>, Douglas E. Berg<sup>h,i</sup>, Lilia Cabrera<sup>j</sup>, Guilherme Debortoli<sup>k</sup>, Denise Duarte<sup>l</sup>, Silvia Ghirotto<sup>m</sup>, Robert H. Gilman<sup>n,o</sup>, Vanessa F. Gonçalves<sup>p</sup>, Andrea R. Marrero<sup>k</sup>, Yara C. Muniz<sup>k</sup>, Hansi Weissensteiner<sup>q</sup>, Meredith Yeager<sup>r</sup>, Laura C. Rodrigues<sup>s</sup>, Mauricio L. Barreto<sup>f</sup>, M. Fernanda Lima-Costa<sup>t,2,3</sup>, Alexandre C. Pereira<sup>b,2,3</sup>, Maíra R. Rodrigues<sup>a,2,3</sup>, Eduardo Tarazona-Santos<sup>a,2,3</sup>, and The Brazilian EPIGEN Project Consortium<sup>4</sup>

<sup>4</sup>The Brazilian EPIGEN Project Consortium includes: Neuza Alcantara-Neves<sup>e</sup>, Nathalia M Araújo<sup>a</sup>, Márcio LB Carvalho<sup>u</sup>, Jackson Santos Conceição<sup>f</sup>, Josélia OA Firmo<sup>t</sup>, Denise P Gigante<sup>d</sup>, Lindolfo Meira<sup>v</sup>, Thais Muniz-Queiroz<sup>a</sup>, Guilherme C Oliveira<sup>w</sup>, Isabel O Oliveira<sup>c</sup>, Sérgio WV Peixoto<sup>t</sup>, Fernando A Proietti<sup>t</sup>, Domingos C Rodrigues<sup>u</sup>, Meddly L Santolalla<sup>a</sup>, Agostino Strina<sup>f</sup>, Camila Zolini<sup>a</sup>

<sup>a</sup> Departamento de Biologia Geral, Instituto de Ciências Biológicas, Universidade Federal de Minas Gerais, CP 486, 31270-901, Belo Horizonte, Minas Gerais, Brazil;

<sup>b</sup> Instituto do Coração, Universidade de São Paulo, 05403-900, São Paulo, São Paulo, Brazil;

<sup>c</sup> Programa de Pós-Graduação em Epidemiologia, Universidade Federal de Pelotas, CP 464, 96001-970 Pelotas, RS, Brazil;

<sup>d</sup> Departamento de Estatística, Instituto de Matemática, Universidade Federal da Bahia, 40170-110, Salvador, Bahia, Brazil;

<sup>e</sup> Departamento de Ciências da Biointeração, Instituto de Ciências da Saúde, Universidade Federal da Bahia, 40110-100, Salvador, Bahia, Brazil;

<sup>f</sup> Instituto de Saúde Coletiva, Universidade Federal da Bahia, 40110-040, Salvador, Bahia, Brazil;

<sup>g</sup> Department of Genetics, University of Leicester, LE1 7RH, Leicester, United Kingdom;

<sup>h</sup> Department of Molecular Microbiology, Washington University School of Medicine, St. Louis, MO 63110, USA;

<sup>i</sup> Department of Medicine, University of California, San Diego, CA 92093, USA;

<sup>j</sup> Biomedical Research Unit, Asociación Benéfica Proyectos en Informática, Salud, Medicina y Agricultura (AB PRISMA), 170070, Lima, Peru;

<sup>k</sup> Departamento de Biologia Celular, Embriologia e Genética, Universidade Federal de Santa Catarina, 88040-900, Florianópolis, Santa Catarina, Brazil;

<sup>l</sup> Departamento de Estatística, Universidade Federal de Minas Gerais, 31270-901, Belo Horizonte, Minas Gerais, Brazil;

<sup>m</sup> Dipartimento di Scienze della Vita e Biotecnologie, Università di Ferrara, 44121, Ferrara, Italy;

<sup>n</sup> Bloomberg School of Public Health, Johns Hopkins University, Baltimore, MD 21205, USA;

<sup>o</sup> Universidade Peruana Cayetano Heredia, 15102, Lima, Peru;

<sup>p</sup> Department of Psychiatry and Neuroscience Section, Center for Addiction and Mental Health, University of Toronto, Ontario M5T 1R8, Toronto, Canada;

<sup>q</sup> Division of Genetic Epidemiology, Department of Medical Genetics, Molecular and Clinical Pharmacology, Innsbruck Medical University, 6020, Innsbruck, Austria;

<sup>r</sup> Cancer Genomics Research Laboratory, SAIC-Frederick, Inc., NCI-Frederick, Frederick, MD 21702, USA;

<sup>s</sup> Department of Infectious Disease Epidemiology, Faculty of Epidemiology, London School of Hygiene and Tropical Medicine, WC1E 7HT, London, United Kingdom;

<sup>t</sup> Instituto de Pesquisa Rene Rachou, Fundação Oswaldo Cruz, 30190-002, Belo Horizonte, Minas Gerais, Brazil;

<sup>u</sup> Laboratório de Computação Científica, Universidade Federal de Minas Gerais, Belo Horizonte, Minas Gerais, Brazil;

<sup>v</sup> Centro Nacional de Supercomputação, Universidade Federal de Rio Grande do Sul, Porto Alegre, Brazil; and

<sup>w</sup> Grupo de Genômica e Biologia Computacional, CEBio, Instituto de Pesquisa Rene Rachou, Fundação Oswaldo Cruz, Belo Horizonte, Minas Gerais, Brazil

<sup>1</sup> These authors equally contributed to this article

<sup>2</sup> These authors equally contributed to this article

Corresponding author:

Eduardo Tarazona Santos

Department of General Biology, Institute of Biological Sciences, Federal University of Minas Gerais, Belo Horizonte, Minas Gerais, Brazil.

Email: [edutars@icb.ufmg.br](mailto:edutars@icb.ufmg.br)

Phone: 55 31 34092597

# INDEX

|                                                                                                  |           |
|--------------------------------------------------------------------------------------------------|-----------|
| <b>1. <u>POPULATION-BASED COHORTS.....</u></b>                                                   | <b>5</b>  |
| <b>2. <u>DATA DESCRIPTION.....</u></b>                                                           | <b>5</b>  |
| 2.1. EPIGEN WORKING DATASETS SUMMARY .....                                                       | 6         |
| <b>3. <u>QUALITY CONTROL AND DATA CLEANING FOR GENOTYPING DATA .....</u></b>                     | <b>6</b>  |
| 3.1. ILLUMINA SNP-ARRAY QUALITY CONTROL .....                                                    | 6         |
| 3.2. DATA EXPORT .....                                                                           | 6         |
| 3.3. DATA CLEANING AND QUALITY CONTROL .....                                                     | 7         |
| <b>4. <u>RELATEDNESS AND INBREEDING IN THE EPIGEN COHORTS.....</u></b>                           | <b>8</b>  |
| 4.1. RELATEDNESS .....                                                                           | 8         |
| 4.2. RELATEDNESS REPRESENTATION USING A NETWORKS.....                                            | 9         |
| 4.3. CONSANGUINITY .....                                                                         | 9         |
| 4.4. ASSOCIATION BETWEEN EXCESS OF OBSERVED HOMOZYGOSITY AND ANCESTRY .....                      | 9         |
| <b>5. <u>DATA INTEGRATION (EPIGEN AND PUBLIC DATASETS).....</u></b>                              | <b>10</b> |
| 5.1. FROM PUBLIC HAPMAP, HGDP AND 1000 GENOMES PROJECT DATA TO FROZEN DATASETS.....              | 10        |
| 5.2. INTEGRATING PUBLIC DATASETS WITH EPIGEN DATASETS .....                                      | 11        |
| <b>6. <u>POPULATION STRUCTURE.....</u></b>                                                       | <b>12</b> |
| 6.1. NETWORK-BASED METHOD FOR REDUCING FAMILY STRUCTURE.....                                     | 13        |
| 6.2. EUROPEAN ANCESTRY IN THE BRAZILIAN POPULATION .....                                         | 13        |
| 6.3. AFRICAN ANCESTRY IN THE BRAZILIAN POPULATION.....                                           | 15        |
| 6.4. NATIVE AMERICAN ANCESTRY IN THE BRAZILIAN POPULATIONS.....                                  | 16        |
| 6.5. CLUSTERS OF RELATIVES IDENTIFIED WITH ADMIXTURE WITH THE ORIGINAL DATASET.....              | 16        |
| 6.6. POPULATION STRUCTURE INFERRED BY X-CHROMOSOME DATA.....                                     | 16        |
| 6.7. EUROPEAN, AFRICAN AND NATIVE AMERICAN LOCAL CHROMOSOME ANCESTRY .....                       | 17        |
| 6.8. APPROXIMATE BAYESIAN COMPUTATION (ABC) TO INFER ADMIXTURE PARAMETERS.....                   | 18        |
| 6.9. POPULATION STRUCTURE INFERRED FROM LINEAGE MARKERS: MITOCHONDRIAL DNA AND Y-CHROMOSOME..... | 19        |
| <b>7. <u>SNP ANNOTATION .....</u></b>                                                            | <b>23</b> |
| <b>8. <u>WHOLE GENOME DATA.....</u></b>                                                          | <b>23</b> |
| 8.1. SAMPLES FOR WHOLE-GENOME SEQUENCING AND QUALITY CONTROL .....                               | 23        |
| 8.2. FUNCTIONAL ANNOTATION WITH ANNOVAR BASED ON REFGENE .....                                   | 25        |

|                                                                         |                  |
|-------------------------------------------------------------------------|------------------|
| <b>8.3. FUNCTIONAL ANNOTATIONS WITH OTHER TOOLS AND DATABASES .....</b> | <b>26</b>        |
| <b>8.3.1.FUNCTIONAL ANNOTATION USING VEP (REFSEQ) .....</b>             | <b>26</b>        |
| <b>8.3.2. FUNCTIONAL ANNOTATION USING ANNOVAR (ENSEMBL) .....</b>       | <b>26</b>        |
| <b>8.4. ANALYSIS OF DELETERIOUS VARIANTS BY CONDEL .....</b>            | <b>26</b>        |
| <br>                                                                    |                  |
| <b><u>9. REFERENCES.....</u></b>                                        | <b><u>28</u></b> |
| <br>                                                                    |                  |
| <b><u>10. FIGURES.....</u></b>                                          | <b><u>30</u></b> |
| <br>                                                                    |                  |
| <b><u>11. TABLES.....</u></b>                                           | <b><u>50</u></b> |

## 1. POPULATION-BASED COHORTS

The Salvador-SCAALA (Social Changes, Asthma and Allergy in Latin America Program) project is a longitudinal study involving a sample of 1,445 children aged 4-11 years in 2005, living in Salvador, a city of 2.7 million inhabitants in Northeast Brazil. The population is part of an earlier observational study that evaluated the impact of sanitation on diarrhea in 24 small sentinel-areas selected to represent the population without sanitation in Salvador. Further details are available in Barreto et al.<sup>5</sup>. From these study participants, 1,309 were successfully genotyped as part of the EPIGEN Project (Genomic Epidemiology of Complex Diseases in Population-based Brazilian Cohorts).

The Bambuí cohort study of Ageing is ongoing in Bambuí, a city of approximately 15,000 inhabitants, in Minas Gerais State in Southeast Brazil. The population eligible for the cohort study consisted of all residents aged 60 years and over on January 1997, who were identified from a complete census in the city. From 1,742 Bambuí individuals older than 60 years (i.e. the eligible residents), 1,606 constituted the original cohort, and 1,442 (82.7% of the older residents) were successfully genotyped as part of the EPIGEN Project. Further details of the Bambuí study can be seen in Lima-Costa et al.<sup>10</sup>.

The 1982 Pelotas Birth Cohort Study was conducted in Pelotas, a city in Brazil extreme South, near the Uruguay border, with 214,000 urban inhabitants in 1982. Throughout 1982, the three maternity hospitals in the city were visited daily and births were recorded, corresponding to 99.2% of all births in the city. The 5,914 live-born infants whose families lived in the urban area constituted the original cohort. From these, we have genome-wide data for 3,736 individuals. Further details are available in Victora and Barros<sup>11</sup>.

## 2. DATA DESCRIPTION

The original datasets received from Illumina, as a result of 2.5M and 5M genotyping, were as follows: 2,379,855 SNPs for 6,504 individuals and 4,301,332 SNPs for 270 individuals. The 2.5M dataset was genotyped with the Illumina HumanOmni2.5-8v1 array and the 5M dataset was genotyped with the HumanOmni5-4v1 array. Both datasets contained individuals from the 3 cohorts, where 90 individuals from each cohort were randomly selected and genotyped for the 5M dataset. These 270 individuals are not present in the 2.5M dataset. All data were generated in the Illumina facility in San Diego (CA, US).

After extensive Quality Control (QC) procedures and filtering, the EPIGEN project has high quality genotyping data for a total of 6,487 Brazilian individuals.

To perform the genotyping analyses presented in this paper we used consensus datasets containing the shared SNPs between the 2.5M and 5M datasets. We also separated these consensus datasets into autosomal SNPs datasets, mitochondrial SNPs datasets, as well as X and Y chromosomal SNPs datasets. Each cohort has unique autosomal, mitochondrial, X and Y chromosomal datasets. Additionally, to allow ancestry and population structure analyses, we created a merged autosomal dataset from the autosomal datasets of the 3 cohorts to represent all EPIGEN data. This EPIGEN-autosomal dataset and the 12 cohort-specific datasets are described in the **EPIGEN Working Datasets Summary** section below.

## 2.1. EPIGEN Working Datasets Summary

### Genotyping Data

Our genotyping data regards only SNPs and 1bp-INDELS. All analyses presented in this paper are based on 4 working datasets for autosomal SNPs, and 9 working datasets for Mitochondrial, X and Y chromosomal SNPs. All these datasets contain only consensus (shared) SNPs from the 2.5M and 5M datasets.

Summary of consensus-autosomal working datasets:

1. EPIGEN\_2.5M\_5M\_autosomal (2,235,109 SNPs for 6,487 samples)
2. Salvador\_2.5M\_5M\_autosomal (2,234,475 SNPs for 1,309 samples)
3. Bambui\_2.5M\_5M\_autosomal (2,233,665 SNPs for 1,442 samples)
4. Pelotas\_2.5M\_5M\_autosomal (2,234,985 SNPs for 3,736 samples)

Summary of consensus-X-chromosomal working datasets:

5. Salvador\_2.5M\_5M\_X (46,906 SNPs for 1,309 samples)
6. Bambui\_2.5M\_5M\_X (46,900 SNPs for 1,441 samples)
7. Pelotas\_2.5M\_5M\_X (46,902 SNPs for 3,736 samples)

Summary of consensus-Y-chromosomal working datasets:

8. Salvador\_2.5M\_5M\_Y (2,136 SNPs for 707 male samples)
9. Bambui\_2.5M\_5M\_Y (2,115 SNPs for 562 male samples)
10. Pelotas\_2.5M\_5M\_Y (2,144 SNPs for 1,873 male samples)

Summary of consensus-mitochondrial working datasets:

11. Salvador\_2.5M\_5M\_mitochondrial (216 SNPs for 1,308 samples)
12. Bambui\_2.5M\_5M\_mitochondrial (213 SNPs for 1,442 samples)
13. Pelotas\_2.5M\_5M\_mitochondrial (218 SNPs for 3,735 samples)

## 3. QUALITY CONTROL AND DATA CLEANING FOR GENOTYPING DATA

Quality control and data cleaning procedures start with the **Illumina SNP-Array Quality Control** and the **Data Export** steps. After that, a number of standard procedures are applied to the EPIGEN datasets, as described next in section **Data Cleaning and Quality Control**.

### 3.1. Illumina SNP-Array Quality Control

According to the Illumina's genotyping report, the 2.5M dataset has the following quality control parameters: Locus Success Rate (99.21%), Genotypes - Call Rate – (99.71%), and Reproducibility (99.99%). The 5M dataset has the following parameters: Locus Success Rate (98.87%), Genotypes - Call Rate – (99.81%), and Reproducibility (100.00%).

### 3.2. Data Export

Genotyping data for both 2.5M and 5M EPIGEN datasets were exported from Genome Studio as PED and MAP format files using the same Illumina plugin with the following parameters: (i) "UseForwardStrand" set to "True", and (ii) remove SNPs that have no signal. As a result, 18,762 SNPs were removed from the 2.5M dataset and 48,815 SNPs from the 5M dataset.

### 3.3. Data Cleaning and Quality Control

The QC and data cleaning processes for genotyping data were performed in four steps: (Step 1) initial data cleaning of the 2.5M and 5M datasets separately, where basic data filters and strand check procedures were applied; (Step 2) separation of autosomal, mitochondrial as well as X and Y chromosome SNPs into distinct datasets and posterior integration in four 2.5M-5M consensus datasets; (Step 3) QC and data cleaning of the consensus 2.5M-5M autosomal SNPs dataset; and (Step 4) QC of the mitochondrial, as well as X and Y chromosome SNPs datasets. Each of these steps is detailed next.

#### Step1: 2.5M and 5M Datasets

For the data cleaning of the 2.5M and 5M datasets, the following filters were applied: removal of SNPs with zeroed (missing) chromosome (Filter 1), and removal of repeated SNPs (Filter 2). A summary is presented in Table S1. For the removal of repeated SNPs (Filter 2), first the Illumina's "kpg" SNP identifiers were replaced by the updated correspondent "rs" identifiers, provided by Illumina. After that, SNPs with the same physical position but different identifiers in the same dataset were considered as duplicated, and for each set of duplicated SNP, those with lower call rate were removed from their respective datasets. In this step of the data cleaning, we also corrected possible strand flips in both datasets using the software PLINK<sup>34</sup>.

#### Step 2: Autosomal Datasets Separation and 2.5M-5M Consensus

After the initial filtering of the 2.5M and 5M datasets, we separated the autosomal from the mitochondrial and sex-chromosome SNPs in each dataset. A summary is shown in Table S2. Next, we combined the 2.5M and 5M Autosomal and Mit/X/Y datasets into one 2.5M-5M autosomal dataset and one 2.5M-5M Mit/X/Y dataset with consensus SNPs. This resulted in a consensus autosomal dataset with 2,256,647 SNPs, and a consensus Mit/X/Y dataset with 49,709 SNPs (Table S2). These datasets contain the shared SNPs between the 2.5M and 5M datasets. Since there was no sample filtering in this step of the data cleaning, the total number of samples in the consensus datasets at this point is 6,774.

#### Step 3: Consensus Autosomal SNPs and Samples

Since we are working with a consensus autosomal dataset, we first perform data cleaning procedures to verify and guarantee consistency between the SNPs in the 2.5M and 5M datasets. These include allele frequency checks and possible strand flip checks. From these analyses, we concluded that there were inconsistencies between the two arrays manifests due to strand flip for a number of SNPs. Particularly, we found a list of 21,624 SNPs that have both allele frequency and genotype (possible strand flip) inconsistencies. Therefore, we excluded the 21,624 SNPs from the consensus datasets (as shown in Table S3).

After that, standard QC procedures were performed for autosomal SNPs, separately for each cohort. The initial consensus autosomal-SNPs dataset had 2,256,647 SNPs and 6,774 samples (Table S2). We start by describing the sample filtering process and then the SNP filtering, as follows.

To evaluate samples, 3 filters were used: the filter `-mind 0.1` from the PLINK software, to evaluate the rate of genotypic loss per individual, which eliminated a total of 214 individuals with more than 10% of missing data (Filter 1); check sample duplicates, which preserved samples with the highest call rate among duplicates, and removed a total of 68 samples (Filter 2); and the sex check filter which removed 5 individuals (Filter 3). This is detailed in Table S4.

Autosomal SNPs were evaluated with the filter  $-\text{geno } 0.10$  from PLINK, applied to evaluate the rate of genotypic loss per marker (Filter 4). The MAF and Hardy-Weinberg equilibrium filters were not applied. Because we are working with admixed population-based cohorts, some level of internal subdivision may exist, and filtering on a customary cutoff of  $10^{-4}$ , may conceal aspects of the genetic structure of these populations. After that, the datasets from the three cohorts were merged with PLINK, recreating the autosomal dataset with 2,256,636 SNPs and 6,487 individuals (Tables S3 and S4). Finally, the list of 21,624 SNPs identified earlier in data cleaning procedure as inconsistent were removed from all 4 datasets (Filter 5). Note that the number of SNPs excluded with the latter filter varies according to the intersection of the SNP list with each dataset. A summary is shown in Table S3.

#### Step 4: Consensus Mitochondrial, X and Y SNPs

Quality control for mitochondrial, X and Y chromosomal SNPs was performed separately for each cohort. From the initial 49,709 SNPs (Table S2), 46,945 are X-chromosomal SNPs, 2,153 are Y-chromosomal SNPs, 220 are mitochondrial SNPs, and 391 are pseudo-autosomal SNPs that were removed from our datasets. As before, SNPs were evaluated with the filter  $-\text{geno } 0.10$  from PLINK (see the Excluded columns in Table S5). The MAF and HWE filters were not applied.

Regarding samples, we maintained the same list of individuals from Table S4 as the starting point, in order to achieve comparable datasets sample size, and further applied the filter  $-\text{mind } 0.1$  from PLINK. The results are shown in Table S5.

The complete data cleaning and QC processes resulted in 4 working datasets for autosomal SNPs, and 9 working datasets for Mitochondrial, X and Y chromosomal SNPs (Table S6). These are the working datasets used in all analyses presented in this paper. Importantly, all datasets contain only consensus (shared) SNPs from the 2.5M and 5M datasets. These are exactly the same datasets that are on Section 2.1 Working Datasets Summary.

## **4. RELATEDNESS AND INBREEDING IN THE EPIGEN COHORTS**

### **4.1. Relatedness**

To assess the family structure, we estimated the kinship coefficients ( $\Phi_{ij}$ ) for each possible pair of individuals from each of the EPIGEN populations. The kinship coefficient  $\Phi_{ij}$  is the probability that two alleles at a locus, randomly picked from individuals  $i$  and  $j$ , are identical by descent (IBD). We estimated kinship coefficients using the method implemented in the REAP software (Relatedness Estimation in Admixed Populations<sup>13</sup>). It estimates kinship coefficients solely based on genetic data, taking into account the individual ancestry proportion (IAP) from  $K$  parental populations and the  $K$ -parental populations allele frequencies per each SNP (KAF). For these analyses, we calculated IAP and KAF using the ADMIXTURE software assuming three unsupervised parental populations ( $K = 3$ , see Section 6 below for details). REAP estimation of kinship coefficients improve when larger numbers of unlinked SNPs are used<sup>13</sup> Assuming the EPIGEN populations as tri-hybrid, we considered the following  $K=3$  parental samples for ADMIXTURE analysis: 174 CEU (European) and 176 YRI (African) from the HapMap Project and 89 Peruvian Native Americans (Shimaa,  $N=45$  and Ashaninkas,  $N=44$ ) from our laboratory database (Tarazona-Santos' group LDGH), reaching 994,151 SNPs shared with all three EPIGEN populations. REAP also estimates the probability that two individuals  $i$  and  $j$ , share 0, 1 or 2 IBD



alleles ( $\delta_{ij}^0, \delta_{ij}^1$  and  $\delta_{ij}^2$ , respectively), and for each admixed individual  $i$  in the sample, it estimates the inbreeding coefficient  $h_i^A$ , which is the probability that the two alleles at a locus within an individual are IBD.

To provide a visual comparison of relatedness in the EPIGEN populations, we plotted the combination of theoretical values of  $\Phi_{ij}$  and  $\delta_{ij}^0$  for different pairs of relatives (Fig. S1A). Next, keeping in mind these theoretical values, we can envisage the level of relatedness in each EPIGEN cohort by plotting, for all pairs of individuals  $i$  and  $j$ , the kinship coefficient  $\Phi_{ij}$  on the vertical axis and  $\delta_{ij}^0$  (on the horizontal axis (Figures 1A and Figs. S1C, S1E and S1G)). We established a “family”-kinship coefficient threshold  $\Phi_{ij} \geq 0.1$  to consider individuals as related or not. This threshold allows us to consider as related: first-degree relatives (pair offspring and full siblings) and second-degree relatives (uncle/aunt, nephew/niece, grandparent/grandchild or half-sibling).

BambuÍ is the unique among the studied cohorts that includes individuals with a wide range of age (over 60 years). We verified if its high level of family structure was an effect of its age structure. Even after excluding all pairs of related individuals ( $\Phi_{ij} \geq 0.1$ ) with more than 5 years of difference in age, Bambuí continued showing the highest family structure level among the EPIGEN populations (429 pairs of individuals with  $\Phi_{ij} \geq 0.1$  vs. 65 in Salvador and 95 in Pelotas).

#### **4.2. Relatedness representation using a networks**

To visualize the family structure of the EPIGEN populations we clustered individuals into family groups using a network approach. To do that, we model the families within each cohort like a network, where each node is an individual who connects to others by edges, that represent kinship coefficients higher than the threshold of 0.1 (Figs. S1B, S1D and S1F). We observed that Bambuí has the most conspicuous family structure with 266 families of up to 25 individuals, followed by Pelotas with 80 families of up to 5 individuals and Salvador with 61 families with up to 3 individuals. Based on these results, we represent in Figs. 1C1, 1E1 and 1G1 the inferred family size distributions in Salvador, Bambuí and Pelotas, respectively.

#### **4.3. Consanguinity**

For each individual of the studied cohorts we estimated the inbreeding coefficient  $h_i^A$  using the REAP software<sup>13</sup>, that perform this estimation conditioning on individual admixture. Fig. S2 shows that for Salvador and Pelotas, inbreeding coefficients are centered on 0, which suggest a negligible level of inbreeding in these populations. Conversely, the highest inbreeding coefficients are observed in Bambuí.

#### **4.4. Association between excess of observed homozygosity and ancestry**

For these analyses, we constructed a dataset with the SNPs shared by the following five populations: one African population (YRI, N=88), one European population (CEU, N=85), both from the 1000 Genomes Project, and the three populations of this study.

To investigate the association between homozygosity excess and ancestry, we estimated the  $F_{ST}$  for each SNP between the YRI and CEU populations as a measure of how these SNPs are differentiated between the two main ancestry sources of the Brazilian population. We used the R package hierfstat<sup>38</sup> to estimate the  $F_{ST}$ . Then, we estimated the  $F_{IT}$  for each SNP for each cohort as a measure of homozygosity excess. We used GLU to calculate the observed and expected-under-Hardy-Weinberg heterozygosities ( $H_o$  and  $H_e$ , respectively) and then

estimated  $F_{IT} = (H_e - H_o) / H_e$ . We estimated the Spearman's rank correlation  $\rho$  using the `cor.test` function in R, to test if there was an association between the  $F_{ST}$  and  $F_{IT}$  values (Fig. S3).

To verify possible genotyping errors in our data, we plotted the  $F_{IT}$  distribution for each cohort (Fig. S3) and identified the allele frequencies of SNPs with extreme  $F_{IT}$  values  $> 0.6$ . We observed that most of these SNPs are rare, having minor allele frequency (MAF) less than 0.01. When an allele has a  $MAF < 0.01$ , a small difference between the expected and observed numbers of heterozygous is enough to have a  $F_{IT} > 0.60$ . For instance, for a  $MAF = 0.001$  in a sample of 1000 individuals, 1 observed and 2.5 expected heterozygous would produce  $F_{IT} = 0.60$ . However, some SNPs with high  $F_{IT} > 0.6$  show MAF higher than 0.01, posing the possibility of genotyping errors. Therefore, for the correlation tests and plots presented here the latter list of SNPs were removed from the working datasets.

Considering that the Bambuí cohort has many related individuals, we removed the 516 related individuals (see Section 6) and repeated the  $F_{IT}$  vs.  $F_{ST}$  analysis. The results were very similar to the first analyses, showing a mean  $F_{IT}$  of 0.015 (as opposed to  $F_{IT} = 0.016$  with related individuals) and  $\rho = 0.16$  (as opposed to  $\rho = 0.18$  with related individuals).

## 5. DATA INTEGRATION (EPIGEN AND PUBLIC DATASETS)

### 5.1. From Public HapMap, HGDP and 1000 Genomes Project Data to Frozen Datasets

Public data from the HapMap project<sup>43</sup>, 1000 Genomes Project<sup>44</sup> and Human Genome Diversity Project (HGDP)<sup>45</sup> were used together with the EPIGEN datasets (in PED/MAP formats) in the form of a frozen dataset (also in PED/MAP format).

#### HapMap Project Datasets

We downloaded all .hapmap (phases II + III) files for all chromosomes and for the mtDNA from all available populations (at [ftp://ftp.ncbi.nlm.nih.gov/hapmap/genotypes/latest\\_phaseII+III\\_ncbi\\_b36/forward/non-redundant/](ftp://ftp.ncbi.nlm.nih.gov/hapmap/genotypes/latest_phaseII+III_ncbi_b36/forward/non-redundant/)). These datasets were then converted to PED/MAP files. At the end of this step, we obtained 275 pairs of files (PED/MAP) representing 11 HapMap populations and 22 autosomes, sexual chromosomes and mtDNA. This generated 11 files (one per population). Table S7 shows the number of individuals and SNPs in the final HapMap frozen datasets.

#### HGDP Datasets

HGDP data is available in a single dataset comprising all populations and chromosomes from <http://hagsc.org/hgdp/files.html>. We identified and excluded SNPs with missing data for all individuals, obtaining 52 PED/MAP files, one for each population. The number of individuals and SNPs in each of these files (datasets) is shown in Table S8.

#### 1000 Genomes Project Datasets

The 1000 Genomes project phase I data, version v3.20101123.snps\_indels\_svs.genotypes, are available in separate files for each chromosome, in VCF format (Variant Call Format)<sup>46</sup>. We only downloaded for each autosomal chromosome, SNPs that are shared with the EPIGEN dataset (see Section 2.1). As a result, we obtained new VCF files separated by chromosomes.

After filtering, the new VCF files for each autosomal chromosome were converted to PED/MAP files. These files were then merged, resulting in a dataset containing the shared autosomal SNPs with the EPIGEN autosomal dataset for all 1000 Genomes populations. The total number of SNPs and the 1000 Genomes populations are described in Table S9.

#### Phased 1000 Genomes Datasets

We also used phased data from 1000 Genomes Project phase I v3.20101123 snps\_indels\_vs.genotypes.nomono.haplotypes /.legend, comprising all populations and all autosomal chromosomes. These datasets, separated by chromosomes, were downloaded in shapeit format from ftp://ftp.1000genomes.ebi.ac.uk/vol1/ftp/phase1/analysis\_results/shapeit2\_phased\_haplotypes/ and stored in our server. The number of individuals in each population and of SNPs in each chromosome for these phased data are presented in Tables S9 and S10.

### **5.2. Integrating Public Datasets with EPIGEN Datasets**

#### Data Integration for PCA and ADMIXTURE Analyses

PCA and ADMIXTURE analyses (see Section 6 below) were performed with integrated datasets, comprising the 3 cohort-specific EPIGEN working datasets (Section 2) and the following public datasets populations: ASW, CEU, MEX/MXL, JPT, LWK, TSI and YRI (from HapMap and 1000 Genomes project datasets); CLM, FIN, GBR, IBS and PUR (from 1000 Genomes project datasets); Tuscan, French, French Basques, Sardinian, North Italian, Orcadian, Russian, Adygei, Yoruba, Bantu, Mandenka, Colombians, Pima, Maya, Surui, Karitiana, Japanese, Bedouin, Druze, Mozabite, and Palestinian (from HGDP datasets); and Peruvian Ashaninka and Shima (Native Americans) populations from Tarazona-Santos' group, genotyped for the same 2.5 Omni array. We used for the PCA and ADMIXTURE analysis the SNPs shared by all these populations.

At the end, we obtained a single dataset, in PED/MAP format, containing 8,267 samples and 331,790 autosomal SNPs. Tables S11 and S12 summarize the number of individuals per population and of SNPs per chromosome (Original Dataset in the Main Text).

To avoid the bias caused by family structure in our population structure analyses, we excluded from Original Dataset (Tables S11 and S12) related samples that were identified by our methodology creating a new dataset, Dataset U (where U stand for Unrelated, see Section 4.1 for relatedness identification and Section 6 for the exclusion method). The number of individuals that were excluded from and kept in each cohort is described in Table S13.

Analyses with X-chromosome data used only female samples. To perform such analyses we integrated genotype data of shared SNPs from the X-chromosome of EPIGEN female samples (from all three cohorts) and the X-chromosome of female samples from the following public datasets populations: ASW, CEU, MEX/MXL, JPT, LWK, TSI and YRI from HapMap and 1000 Genomes; CLM, FIN, GBR, IBS and PUR from 1000Genomes and Tuscan, French, French\_Basque, Sardinian, North\_Italian, Orcadian, Russian, Adygei, Yoruba, Bantu, Mandenka, Colombians, Pima, Maya, Surui, Karitiana, Japanese, Bedouin, Druze, Mozabite from HGDP. The X chromosome data of HapMap and HGDP populations were extracted from our frozen datasets, while data from female samples of the 1000 Genomes were downloaded separately for these analyses. The above data integration yielded genotyping data with 5,792 SNPs for 4,192 female samples, as detailed in Table S14.

## Data Integration for Tri-Hybrid Local Ancestry Analyses

For the local ancestry analyses we used phased data from 1000 Genomes Project populations YRI and LWK (Africans) and CEU, FIN, GBR, TSI and IBS (Europeans), from Native Americans populations Ashaninka and Shimaá (from Tarazona-Santos group LDGH dataset), and from the 3 EPIGEN populations (Original Dataset).

The SHAPEIT software<sup>39</sup> was used to generate phased datasets. The polymorphic shared SNPs between 1000 Genomes African and European populations, Native Americans and the EPIGEN cohorts were used for the local analyses. At the end, we obtained for each chromosome, 6 datasets: Africans (YRI + LWK) with N=185, Europeans (CEU + FIN + GBR + TSI + IBS) with N=379, Native Americans (Shimaá + Ashaninka) with N=89 and the three EPIGEN populations: Bambuí (N=1,442), Pelotas (N=3,736) and Salvador (N=1,309). The number of SNPs per chromosome used in the local ancestry analyses are described in Table S15.

## **6. POPULATION STRUCTURE**

The Principal Component Analysis (PCA) was applied using EIGENSOFT 4.21<sup>35</sup>. We ran ADMIXTURE<sup>7</sup> to explore global patterns of population structure between two subsets of data: the Original Dataset with all samples (including related EPIGEN samples), and Dataset U (unrelated, see Section 5.2). We always ran ADMIXTURE in unsupervised mode, which estimates individual ancestry values solely using information from the included genotypes, without any information about which individuals belong to which population. All ADMIXTURE analyses were repeated 4 times using binary input files and different random seed numbers, and in all cases results were highly correlated.

To arrive to a dataset with only unrelated samples (Dataset U) we need to reduce the level of family structure of the Bambuí cohort. To do that without eliminating all families, we implemented a network-based approach that aims at eliminating the smallest possible number of individuals (see description in Section 6.1). We applied our method to the EPIGEN populations datasets to generate Dataset U (with only unrelated EPIGEN individuals). As a result, 63 (of 125 relatives), 516 (of 886 relatives) and 83 (of 169 relatives) individuals were removed from the Salvador, Bambuí and Pelotas cohorts, respectively.

In summary, the Original Dataset is composed by 6,487 individuals from the EPIGEN populations, including relatives plus 1,780 individuals from our integrated public dataset and 331,790 autosomal SNPs (see Section 5.2). Dataset U is composed of 5,825 individuals from the EPIGEN populations without related individuals (after the exclusion previously presented, based on family structure) plus 1,780 individuals from our integrated public dataset and the same autosomal SNPs as the Original Dataset (Section 5.2). Dataset U was the main dataset used to study the population structure of the EPIGEN cohorts.

ADMIXTURE results were shown by barplots (Figs. S4A and S5) where each bar represents an individual and the colours represent the proportion of each inferred ancestry. We ran ADMIXTURE from K = 2 to K = 15 for the Dataset U (Fig. S4A), and from K = 3 to K = 10 for the Original Dataset (Fig. S5). Using ADMIXTURE's cross-validation procedure we found that K = 6 has the lowest predicted error (Fig. S4B).

Based on the results of ADMIXTURE with K=3 and from the Principal Components 1 and 2 (PC1 and PC2), we were able to differentiate the main continental parental groups that contributed

to the formation of the Brazilian population: Europeans, Africans and Native Americans (Figs. 1B and 1C, Figs. S4A, and S6 (A, D and G)). The Salvador cohort presented a mean proportion of 0.43 continental European ancestry while for the Bambuí and Pelotas cohorts the values were 0.77 and 0.76, respectively. Regarding the continental African ancestry, the Salvador, Bambuí and Pelotas cohorts presented mean proportions of 0.50, 0.16 and 0.16, respectively. The mean proportion of continental Native American ancestry were similar and low for all EPIGEN cohorts: 0.06, 0.07 and 0.08 in Salvador, Bambuí and Pelotas, respectively. Also, ADMIXTURE analysis with  $K=4$  identifies the Japanese individuals from HapMap and 1000 Genomes, but none of the Brazilian individuals showed a relevant contribution from this ancestry cluster.

### **6.1. Network-based method for reducing family structure**

We designed and implemented a node selection algorithm based on node centrality degree statistics. This statistic was calculated using the last version of the software NetworkX (<https://networkx.github.io/>). The degree centrality for a node  $v$  is the fraction of nodes that it is connected to.

The network is generated with all individuals from a given cohort represented as nodes. Links between nodes are established if the kinship value between these nodes (individuals) is higher than the 0.1 kinship threshold ( $\Phi_{ij} \geq 0.1$ , for two individuals  $i$  and  $j$ ). Therefore, clusters of connected nodes in the network indicate families. The goal of the algorithm is to eliminate these clusters by removing the smallest possible number of nodes (i.e. individuals), thus creating a totally disconnected network (or an edgeless network). To do that, our algorithm works in two steps. First, we iteratively (i) calculate the nodes centrality degree and (ii) eliminate those with highest centrality degree (or the most central nodes), until only pairs of nodes (like families with only two individuals) and/or unconnected nodes (or nodes with zero centrality degree) remain in the network (N1).

The second step consists of disconnecting pairs of nodes that remained in N1 from the first elimination round (the first step). This is necessary to guarantee that the final network is totally disconnected. To decide the best individual to be eliminated from each pair, we look at the individuals with a smaller degree of kinship relations. This is done by creating a new network (N2), but this time with node connections with kinship values smaller than the original threshold (0.1). These new node connections must also have a kinship value higher than 0.03, which is the minimum value for related individuals (thus,  $0.03 < \Phi_{ij} \leq 0.1$ ). Having this new network, we calculate the degree centrality of each node in the pair. The node with highest degree centrality is eliminated from N1. At the end of this step, we have a final network, N1, with only unconnected nodes.

### **6.2. European ancestry in the Brazilian population**

ADMIXTURE analysis with  $K=5$  identifies European-Middle East substructure, and in fact, new clusters appear associated with Europe (Fig. S4A in red) and Middle East/Southern Europe (Fig. S4A in purple). With  $K=7$ , the purple Middle East cluster is further separated, generating a cluster more associated only with Middle East (Fig. S4A in magenta), and a Southern European-associated cluster (purple). For the sake of readiness, hereafter we call these geographically-associated ancestry clusters obtained with  $K=7$ , simply as North European (red), Middle East (magenta) and South European (purple) clusters, even if we make clear that these associations are of course not absolute, in the sense that most European and Brazilian individuals share variable percentages of each cluster. This substructure is also visualized by the PCA, where the

distribution of North European, South European and Middle Eastern populations is captured by the Principal Component 4 (Fig. S6B, S6E and S6H and Figure 3B).

The Salvador population presented a mean proportion of 0.43 of the total European ancestry, while for the Bambuí and Pelotas cohorts the values were 0.77 and 0.76, respectively (Fig. S4A, K=3, red color). When analyzing the mean proportions for the sub-continental clusters of European ancestry in the Salvador population corresponding to K=7, we find values of 0.16, 0.23 and 0.04 for North European, South European and Middle Eastern clusters, respectively. For the Bambuí population, these values were 0.275, 0.425 and 0.068, and for the Pelotas population 0.307, 0.402 and 0.054, respectively (Fig. S4A, K=7).

Our results indicate a higher mean proportion of North European ancestry in the south of Brazil (40.2% of Pelotas European ancestry), in comparison to the Southeast (Bambuí, 35.8% of the European ancestry) and the Northeast (Salvador, 36.7% of the European ancestry). Consistently, the European ancestry of some Pelotas individuals matches very well that of some North European individuals (Figure 3A and 3B, K=7 and PCA plot).

In addition, the Principal Components Analysis allowed the separation of Europe in East and West (Figure 3B, PC6), while this substructure was not detected by ADMIXTURE analysis using a range of K=3 to K=15. The resemblance of most Brazilians with Southwest European individuals is consistent with its predominant Iberic colonization.

With K=8 we verify another European ancestry cluster (cyan) with its highest mean proportion in Bambuí (0.225), in comparison to Salvador (0.064) and Pelotas (0.064), (Figs. S4A). We observed that this cluster has a South European origin, since its highest mean proportions are in Sardinian (0.16), French Basque (0.16) and Iberian Spanish (0.14) populations. The South European origin of this cluster is confirmed when analyzing the distributions of the Northern and Southern clusters mean proportions in Bambuí throughout the analyses with different Ks. When comparing the mean proportions of the Northern and Southern European clusters in Bambuí for analysis with K=7 and K=8 (where the cyan component appears), we verify a more marked decrease in the Southern European cluster (0.134) when compared to the Northern European cluster (0.075). This suggests the Southern European origin of this cyan cluster.

A possible explanation for the high mean proportions of this cluster in Bambuí is a founder effect due to the small size of the Bambuí population, and therefore, more subject to genetic drift. Genetic drift was quantified through a genetic distance analysis ( $F_{ST}$ ) between the different clusters (Ks) generated in analysis with K=8 (Table S16). We observed a  $F_{ST}=0.029$  between the cyan cluster and the other both European clusters (North [red] and South [purple]). This differentiation is similar to the difference found between North and South of Europe ( $F_{ST}=0.030$ ), and higher than the observed between the East and West Africa clusters with K=9 ( $F_{ST}=0.019$ , see Section 6.3 below).

With K=10 we observe a cluster with higher mean proportions in Bambuí (0.25) and Pelotas (0.30) than in Salvador (0.15) (Fig. S4A, K=10, grey color). This cluster also appears in all European populations, with its highest values in French (0.34), British in England and Scotland (GBR) (0.32) and Sardinian (0.32). This cluster appears in high proportions (>80%) in some Brazilian individuals, mainly from Pelotas, while no European individuals show this proportion of the grey cluster.

To evaluate the robustness of our results regarding European ancestry, we reproduced PCA and ADMIXTURE analyses with a different dataset including more individuals but a reduced

number of 44,901 shared SNPs. We selected from Dataset U EPIGEN individuals with more than 50% of whole European ancestry (measured by K=3, Original Dataset, in ADMIXTURE analysis), merged them with POPRES (Population Reference Sample) European individuals (from Albania, Austria, Belgium, Bosnia, Bulgaria, Croatia, Cyprus, Czech Republic, England, Finland, France, Germany, Greece, Hungary, Ireland, Italy, Latvia, Macedonia, Netherlands, Norway, Poland, Portugal, Romania, Russia, Scotland, Serbia, Slovakia, Slovenia, Spain, Sweden, Switzerland, Turkey, Ukraine, Yugoslavia<sup>25</sup>), with individuals (from Canary Islands, Spain\_NW and Spain\_S)<sup>26</sup> and with HapMap, 1000 Genomes and HGDP individuals from our Dataset U. We confirmed the patterns of ancestry observed with our Dataset U. In particular, the Bambuí associated cluster (the cyan cluster in K=8 on the Dataset U analysis), appears at K=7 in the EPIGEN-POPRES-Botiguè analysis, and is also more prevalent in Southern European populations such as Portugal-POPRES, and Spanish/Canary Island from POPRES and<sup>26</sup>.

### **6.3. African Ancestry in the Brazilian population**

Our worldwide dataset for comparison includes four African populations belonging to the Niger-Kordofanian linguistic macro-family, the most spread in South-Saharan Africa. Two of them are Bantu-speaking, namely, Luhya from Kenya and the scattered HGDP-Bantu from Southeastern Africa. The former descend from the large spread of farmers from near the Nigerian/Cameroon highlands across eastern and southern Africa within the past 5000 to 3000 years<sup>8</sup>. The other two populations included in the analysis are non Bantu-speaking populations from Western Africa, Yoruba and Mandenka, which are known for their high contribution to the African diaspora to Brazil and USA.

We detected two within-Africa ancestry clusters in the current Brazilian population (Figure 3C, K=9): The blue cluster, associated with the Yoruba/Mandenka non-Bantu Western populations; and the mustard cluster, associated with the Luhya/HGDP Bantu populations from Eastern Africa.

To verify which Principal Component better differentiates these East/Bantu and West/non-Bantu groups, we performed a correlation analysis between the values of each PC (PC10 and PC11) for each African individual and the logarithm of the ratio of mustard/blue contributions percentage (calculated from ADMIXTURE analysis with K=9). We found that PC10 and PC11 capture the African sub-continental differentiation evidenced by ADMIXTURE with K=9 (Figs. 3D and S7).

The Salvador, Bambuí and Pelotas cohorts presented, respectively, 0.50, 0.16 and 0.16 mean proportion of global African ancestry (Figs. 1B and Fig. S4A, K=3). The mean sub-continental proportions for the mustard cluster (East Africa/Bantu associated, EAFR) and blue cluster (West Africa /non-Bantu associated, WAFR) of the three Brazilian populations and the Afro-American population ASW from HapMap are in Table S17. To verify the different African contributions in different Brazilian regions, we calculate the ratio between the means of blue (WAFR) and the mustard (EAFR) clusters (Blue/Mustard) for the three Brazilian cohorts and for Afro-Americans (ASW). Blue/Mustard ratios are 4.85 for ASW, 3.00 for Salvador, 1.79 for Bambuí and 1.30 for Pelotas. Thus, there is a higher proportion of the mustard-EAFR cluster in Southeast and Southern Brazil, respect to Northeast.

To verify whether the percentage of the individual total African ancestry influenced ADMIXTURE estimates of sub-continental clusters of African ancestry, we performed ADMIXTURE analyses only with individuals showing more than 50% total African ancestry,

previously inferred with ADMIXTURE by K=3, using the same parental populations. By performing this analysis, the same two clusters of African sub-structure were detected by K=7, and we estimated the ratio of the corresponding individual blue (West) to mustard (East) ancestry proportions. We compared the logarithms of the individuals Blue/Mustard ratios with values of the same variable, estimated for the same individuals in the global analysis (i.e., that incorporated the whole set of individuals), using correlation analysis. We found a strong correlation between the two estimates ( $r^2=0.97$ ,  $p<2.2e-16$ , Fig. S8), revealing that the individual total African ancestry does not influence ADMIXTURE power to infer African sub-structure.

To verify whether the distribution of African sub-continental ancestry depends on the total African ancestry, we estimated the correlation between the logarithm of the individuals Blue/Mustard ratios and the total African ancestry of individuals for each Brazilian population. We observed a significant correlation between the log (Blue/Mustard) and the global African ancestry for Salvador and Pelotas ( $r^2=0.22$ ,  $p<1.2e-14$  for Salvador and  $r^2=0.14$ ,  $p<2.2e-16$  for Pelotas, Figs.S9A and S9C). For Bambuí the correlation was not significant ( $r^2=0.0014$ ,  $p<0.96$ , Fig. S9B). Therefore, in Salvador and Pelotas, the West African cluster of ancestry is more present in individuals with more total African ancestry.

#### **6.4. Native American ancestry in the Brazilian populations**

Considering the low contribution of Native Americans to Brazilians, we do not further analyze the genetic structure of Native American ancestry clusters.

#### **6.5. Clusters of relatives identified with ADMIXTURE with the Original Dataset.**

In the ADMIXTURE analysis performed with the Original Dataset (before the exclusion of related individuals), we identified clusters (by K=7 to K=10) that are associated to groups of individuals that match those identified by the REAP kinship analysis as relatives (Fig. S5). For instance, by K=7 we observed two clusters that are highly associated with two Bambuí families inferred by REAP (Fig. S10, brown and black clusters). In particular, all individuals with more than 80% of the black cluster belong to a unique family of 25 individuals identified by REAP (Fig. S10). The second Principal Component obtained only with the entire Bambuí cohort also separates these related individuals (Fig. S10). Moreover, individuals from this family (i.e. belonging to the black cluster) have higher inbreeding coefficients than the entire Bambuí cohort (mean 0.042 vs. 0.012,  $p=0.048$  by Wilcoxon Signed-Rank test), which suggest that recurrent consanguineous marriages may be associated to specific families.

We did not detect, through ADMIXTURE and PCA analyses, any family structure in the Pelotas and Salvador cohorts, in agreement with the REAP results (Section 4).

These results evidence that family structure can be a confounding factor in studies of population structure. With enough data, ADMIXTURE and PCA analyses interpret familiar structure as ancestry clusters, if families include enough individuals.

#### **6.6. Population structure inferred by X-chromosome data**

X-chromosome diversity data are more associated to the demographic history of women, because X-chromosomes spend 2/3 of their evolutionary history in females, and only 1/3 of it in males. We applied: (i) Principal Component Analysis (PCA, EIGENSOFT 4.21, see section PCA), and (ii) unsupervised ADMIXTURE analysis by K=3, to the diploid X-chromosome data for 5,792 SNPs of 4,192 EPIGEN females (see section 5.2, Table S14). For comparison, we re-



analyzed autosomal data extracted from the Original Dataset, including the same females individuals present in the X-chromosome dataset (4,192 female samples for 331,790 autosomal SNPs).

We observed that: (i) The distributions of individuals on the PC1 vs. PC2 space (the only informative clustering pattern for X-chromosome), suggest differences in the evolutionary history of males and females. For the three EPIGEN populations, we observed that compared with autosomal data (Fig. S11), a larger number of females X-chromosome cluster near the Native American and African parental populations (Fig. S11). This is consistent with the lower effective recombination rate of the X-chromosome<sup>47</sup>, that result in a large number of X-chromosomes with a unique continental ancestry. This differential pattern between X-chromosome and autosomal markers is not evident for European ancestry, because it is the predominant continental ancestry in our sample, and therefore there is a high number of individuals with both high autosomal and X-chromosome European ancestry. (ii) Both PCA and ADMIXTURE analyses show that compared with autosomal data, the X-chromosome show a larger Native American and African contribution to extant Brazilian genomic diversity than at genome-wide level (Figs. S11 and S12A). This is due to a historical pattern of sex-biased preferential mating between males with predominant European ancestry with women with predominant African or Native American ancestry. This pattern of mating is well documented in demographic and genetic studies across all Latin America<sup>12</sup>. (iii) On average, the sex-bias in admixture was larger in Salvador, and lower in Bambuí and Pelotas, and it was higher for Native American ancestry than for African ancestry (Table S18 and Figs. S12B and S12C).

#### **6.7. European, African and Native American Local Chromosome Ancestry**

We inferred chromosome local ancestry using the PCAdmix software<sup>19</sup> using ~2 Million SNPs shared by EPIGEN and 1000 Genomes Project (Section 5.2). Considering our SNPs density, we defined a window length of 100 SNPs, following<sup>27</sup>. PCAdmix infers the ancestry of each window. Local ancestry inferences were performed after linked markers ( $r^2 > 0.99$ ) were pruned to avoid ancestry misestimating due to overfitting<sup>4</sup>. We considered only the windows which ancestry was inferred by the forward-backward algorithm with a posterior probability  $> 0.90$ .

After local ancestry inferences, we calculated for each haplotype from each chromosome from each individual, the lengths of the chromosomal segments of continuous specific ancestry (CSSA), which distribution is informative about the admixture dynamics. The distribution of CSSAs length was organized in 50 equally spaced bins defined in cM and plotted for each population (Fig. S13 and Fig.2A). The distribution of CSSA length suggest that the admixture dynamics is similar in Bambuí (SE) and Pelotas (S), but not in Salvador (NE), where the European CSSA lengths are shorter, suggesting recent European admixture or a more pronounced ancestry-based positive assortative mating in the former than in Salvador. African admixture dynamics seems to be similar across the three cohorts.

We also looked for each population for entire chromosomes of a distinct ancestry that would suggest recent admixture and/or ancestry assortative matting. In Southeastern Brazil, and particularly in the Southern Brazil, we found a large number of individuals with European full chromosomes (Figure S14A), consistently with recent European immigrations to these regions. Interestingly, the Brazil's Southeast and South present individuals with a larger number of African full chromosomes than in northeastern Brazil (Figure S14B), suggesting a more pronounced assortative matting based on African ancestry in South and Southeast compared

to Northeast. These findings are consistent with the 2010 Brazilian census (<http://censo2010.ibge.gov.br/>) that showed that about 70% of Brazilian people were married to the same group of people of color/race.

### 6.8. Approximate Bayesian Computation (ABC) to Infer Admixture Parameters

We implemented a new approach based on Approximate Bayesian Computation (ABC)<sup>48</sup> and local ancestry to infer historical admixture parameters for each of the EPIGEN populations, conditioning on a model of admixture dynamics of three pulses of immigration. The main steps of this approach are:

- (1) generation of an informative prior distribution of admixture parameters for each pulse, conditioning on the estimated total continental ancestry;
- (2) simulation of chromosome segments of continuous specific ancestry (CSSAs), based on the prior distribution;
- (3) computation of the distance between the simulated and observed CSSA distributions;
- (4) estimation of the posterior distribution of the admixture parameters for each pulse by retaining the simulated CSSA distributions that are more similar to the observed distribution.

We simulated CSSA using the stochastic process described in<sup>20</sup> and implemented by them in the algorithm multipulses. The Liang-Nielsen model allows for at most one admixture event from a unique ancestral population per generation (i.e. European or African or Native American admixture). Considering this assumption and that European/African admixture in the Americas started 500 years ago, we constructed a model of admixture dynamics of three admixture pulses (early, intermediate and recent) distributed over 20 generations of 25 years each (Fig. S15). Each pulse has three possible proportions of immigrants ( $\mathbf{m}$ ) from the ancestral populations (European (EUR), African (AFR) and Native American (NAT)) arriving in consecutive generations. We called Admixture Scenarios (ASs) the combination of  $\mathbf{m}_{n,p}$  (total of nine  $\mathbf{m}$  parameters), where the positive real number  $\mathbf{m}$  is the proportion of immigrants respect to the admixed population from the ancestral population  $n$  in the pulse  $P$ .

To explore the space of population mean proportion of ancestry ( $\mathbf{M}$ ) space, we randomly generated the  $\mathbf{m}$  number in each admixture pulse to produce ASs following these rules:

- (a) The admixture events from the three ancestral populations are randomly sorted along the three generations of each admixture pulse;
- (b) For Pulse 1: the first  $\mathbf{m}$  is equal to 1 (i.e. founder population) and the sum of the next two  $\mathbf{m}$  is  $\leq 1$ ;
- (c) For Pulses 2 and 3: the sum of the three  $\mathbf{m}$  is  $\leq 1$ .
- (d) After each immigration event defined by  $\mathbf{m}_{n,p}$  is generated, the three parameters  $\mathbf{M}$  corresponding to the three ancestral populations are updated.

These rules aim to avoid an unrealistic scenario in which a population is totally substituted by another population, and they allowed exploring all the  $\mathbf{M}$  space from a uniform  $\mathbf{m}$  over the three pulses (Fig. S16).

Initially, we randomly generated the  $\mathbf{m}_{n,p}$  for 20 million of ASs and calculated the associated  $\mathbf{M}_{n,p}$  over the three pulses, using the pseudocode described in Fig. S17. We retained those combinations of nine  $\mathbf{m}_{n,p}$  values that generate  $\mathbf{M}_{n,3}$  (current admixture proportions after the

third admixture pulse) within the 5% range centered on the inferred mean proportion of European, African and Native American ancestry in Salvador (43%, 50% and 7%), Bambuí (77%, 16% and 7%) and Pelotas (76%, 16% and 8%). In this way, we generated informative prior distributions of admixture parameters  $\mathbf{m}$ , ensuring that they always produce final  $\mathbf{M}$  close to the observed data. It reduces the number of simulations needed in the following step, that is more computationally demanding.

Then, we used Liang-Nielsen multipulses software to simulate CSSAs distributions for the chromosomes 14, 19, 21 and 22 using the filtered ASs (~180.000 sets of  $\mathbf{m}_{n,p}$ ) and the same number of diploid individuals (Salvador (1309), Bambuí (1442) and Pelotas (3736) for each EPIGEN population. We estimated the distance between the distributions of simulated and observed CSSAs (Section 6.7) using the Kolmogorov–Smirnov statistics  $K_s$ <sup>49</sup> Finally, we retained the 1% of the ASs that generated the simulated CSSA distributions closest to the observed CSSA distribution, estimating the posterior distribution of the 9  $\mathbf{m}_{n,p}$  for each EPIGEN population (Figs. S18-20). Considering the posterior probability distributions, we calculated the quantile-based probability intervals of 90% using Bayesian unimodal Highest Posterior Density (HPD) intervals (Fig. 2B).

Our ABC approach allowed us to elucidate the admixture dynamics in Brazilians. Overall, we observed different admixture dynamics between the Northeastern Brazil (Salvador) and Southeastern/South (Bambuí and Pelotas).

The European contribution to Salvador mainly occurred during the early and intermediate admixture pulses (AP) and to a lesser extent during the recent AP. Conversely, Bambuí and Pelotas showed an even European contribution over the three AP (Fig.2B and Figs. S18-20). The African contribution to the three populations showed a decreasing trend across time, but this trend was more pronounced in Bambuí and Pelotas (Fig.2B and Figs. S18-20). The dynamics of Native American contribution was small and similar in the three studied Brazilian populations, concentrated during the early pulse (Fig.2B and Figs. S18-20). Interestingly, this is consistent with the Native American decimation after the arrival of the Portuguese settlers.

## **6.9. Population structure inferred from lineage markers: mitochondrial DNA and Y-chromosome**

### Methods for Mitochondrial DNA Analysis

Merging data sets. After variant calling and QC filters for mitochondrial DNA (mtDNA), we had the following number of SNPs and subjects for each sample: Bambuí (213 SNPs; 1,442 individuals), Pelotas (218; 3,735), and Salvador (216; 1,308). These three sets of samples were merged, for a total of 219 SNPs and 6,485 individuals.

Haplogroup assignment. We performed haplogroup assignments using HaploGrep<sup>40</sup> (<http://haplogrep.uibk.ac.at/>), a web tool based on Phylotree (build 16) for mtDNA haplogroup assignment.

Haplogroup assignment checking. We adopted two strategies to check the HaploGrep results: (a) we used Network.exe (<http://www.fluxus-engineering.com/sharenet.htm>) to check for outliers. The HaploGrep-output file was split in smaller files containing subjects classified as belonging to the same haplogroup. We analyzed each haplogroup-specific independently with the Network software (using median joining calculation). Outliers were manually investigated for haplogroups assignment according to Phylotree build16 (<http://www.phylotree.org/>). (b)

We conducted PCA of the 6,485 individuals to check if each set of samples classified in a specific-haplogroup would cluster together in the PCA plot. Also, PCA was used to verify if we would be able to reproduce the pattern of Phylotree with the 219 SNPs used for the haplogroup assignment. We calculated the four first Principal Components (ade4 package) in R, and PCA plots of the first two PCs were generated for all sample. We repeated the analysis, independently, for the set of individuals with Europeans haplogroups as well as the set of individuals with African haplogroups

Based on the haplogroup/subhaplogroups frequencies (inferred by HaploGrep), population genetics analyses were performed using the Arlequin software 3.1<sup>50</sup>.

The haplogroup assignment checking performed with the network and PCA suggest that HaploGrep was efficient in determining the haplogroup status using the set of 219 SNPs available for the analysis. Sequences classified as belonged to a specific haplogroup or sub-haplogroup were clustered together in the PCA plot, and we did not observe any outliers (i.e. potential haplogroup misclassified) in our sample. Furthermore, we were able to reproduce the mtDNA phylogeography tree through PCA, being able to distinguish among individuals from Africa, Asia/America and Europe.

HaploGrep also provides a confidence value for its haplogroup/subhaplogroup inferences, based on two components rank calculation (for details see<sup>40</sup>). This is however only valid for whole mtDNA genomes. We therefore classified all profiles defined in Phylotree by applying a range according to the available SNPs positions to check the reliability of the resulting haplogroups with HaploGrep. This way we found 96.1% of all 4,806 possible haplogroups to be classified in the correct Macro-Haplogroup. B4a\*haplogroups in Phylotree could not be found with the available SNPs and were classified in 70 out of the 76 present false as HV, 28 of 52 Phylotree V groups ended up in the HV0 haplogroup. Also Haplogroups in the R\* clade result in the HV branch. In total 35 HV haplogroups were found, with a frequency of 0.5%.

We had a total of 6,485 individuals for 124 inferred haplogroups or sub-haplogroups. Table S19 shows the frequencies of all haplogroups and subhaplogroups inferred by HaploGrep. Table S20 summarizes the population genetics results of the haplotype analyses.

To estimate admixture contributions from mtDNA, we relied on the continental tri-hybrid admixture nature of the Brazilian population and on extensive available literature on the phylogeography of mtDNA, and we performed the continental biogeographic assignments of haplogroups (Table S21). Namely, haplogroups A, B, C and D were considered as Native Americans, haplogroups H, HV, I, J, K, T, U, V, M, N, P, Y, W were considered as markers of European/Middle Eastern and Asiatic admixture, and all the L haplogroups were considered as markers of African admixture during the last five centuries. This biogeographic classification has some limitations. For instance, haplogroups H and V have been recently reported in some Sub-Saharan African populations at medium frequencies (10-15%)<sup>51,52</sup>. Therefore, by considering all H and V haplogroups as European, we recognize that we overestimate the European contribution and under-estimate African contribution.

Based on biogeographic assignments of Table S21, we estimated the African, European and Native American female-mediated (i.e. based on mtDNA) contributions to the three EPIGEN cohorts simply as the observed frequencies of the continental-attributed haplogroups. We considered all the Eurasian haplogroups as European contribution (including Middle East), because based on historical records, East Asian contribution should be very low. Overall, both

African and Native American ancestry estimates for mtDNA are higher than autosomal estimates across the three cohorts (Table S20), which is the result of a historical pattern of sex-biased preferential mating between males with predominant European ancestry with women with predominant African or Native American ancestry. This pattern of mating is well documented in demographic and genetic studies across all Latin America<sup>12</sup>. Despite this bias, across the three cohorts the largest continental contributions are the same both for autosomal and mtDNA estimates: African for Salvador, and European for Bambuí and Pelotas, although in Bambuí, the three continental contributions are more evenly distributed for the mtDNA. This predominant African ancestry in Salvador and the predominant European ancestry in Bambuí and Pelotas are reflected in the highest differentiation of the Bambuí cohort in the  $F_{ST}$  matrix based on mtDNA (Table S22).

Subcontinental biogeographic interpretation. When we estimate the population differentiation ( $F_{ST}$ ) between the EPIGEN cohorts independently for the sets of haplogroups/subhaplogroups assigned to each continental ancestry (i.e. when we exclude the effect of the higher whole-African contribution to Salvador and the higher whole-European contribution to Bambuí and Pelotas), Bambuí is consistently the most differentiated population. Because this is a general pattern of most Bambuí haplotypes, independently of their continental origin, this pattern probably reflects the recent Post-Columbian demographic history of Bambuí that, as inferred from autosomal data, has an important familiar structure and high levels of inbreeding that are likely related with a higher level of isolation respect to Pelotas and Salvador. Bambuí, independently of its higher frequencies of the African L haplogroups, is characterized by: (i) the absence of the Native haplogroup A, which is common in almost all Latin American population with a non-negligible Native American female-mediated genetic contribution). (ii) a relative high frequency of the Eurasian haplogroup N (13% vs. <1% in Salvador and Pelotas) and (iii) by presenting the L1c haplotype (more common in West-Central Africa than elsewhere in the continent<sup>53</sup>) as modal among the African-specific haplogroups (22%). In Salvador and Pelotas, L1c is the second most common African haplotype (12% and 15% respectively), the pan-African L2a being modal.

Respect to intra-continental sub-haplogroups distribution, Pelotas and Bambuí, despite their similar genome-wide estimates of total European ancestry, differs in the frequency of the Euroasiatic N subhaplogroups: 94.5% of the N haplogroups in Pelotas are N vs 1.3% in Bambuí and 0.05% of the N haplogroup in Bambuí are N2 vs. 68.4% in Pelotas. Also, in general the M haplogroup is rare in our samples, but the M1 subhaplogroup is common in Pelotas respect to the total of the M haplogroup (66 out of 70 copies). For African subhaplogroups, Pelotas respect to Salvador has slightly higher frequencies (relative to the pool of L haplogroups) of subhaplogroups L3e, L3 and L1c and slightly lower frequencies of subhaplogroups L1b and L2a.

The dataset for the analyses was composed by 3,142 males from Bambuí (N=562), Pelotas (N=1,873) and Salvador (N=707). From the 2,775 Y-SNPs genotyped, 1,886 were used in these analyzes.

We inferred haplogroups using an automated approach, written in Perl, called AMY-tree<sup>41</sup>. The assignment considers a phylogenetic tree with the root on the left and the leaves on the right side, traversing the nodes to determinate the (sub)haplogroups of each sample, due the hierarchical order of the non-recombining region of Y chromosome (NRY) variants. For the haplogroups inferences, we considered the “Karafet tree”<sup>42</sup> and more recent studies to describe additional sub-haplogroups, therefore, an updated tree was considered based on the

information given in The International Society of Genetic Genealogy (ISOGG version 9.43, [www.isogg.org](http://www.isogg.org) accessed in 03.20.2014).

Since many SNPs may have several names, these redundancies were identified and considered only once. Capital letters were used to identify major clades and the alphanumeric nomenclature was applied to name sub-haplogroups, following<sup>42</sup>.

From the AMY-tree output, we organized results considering each population. Tables with absolute numbers and frequencies were manually constructed, considering both major clades and sub-haplogroups. All samples were associated to at least a major clade (like T\*) and, when possible, sub-haplogroup were identified (like R1b1a2a1a2b2a1\*).

Using the Y-SNP dataset we determine the Y-haplogroup of all males (N=3,142) and identified 70 sub-haplogroups included in 14 major clades. Considering each population, we found 43 sub-haplogroups in Bambuí (N=562), 60 in Pelotas (N=1,873) and 51 in Salvador (N=707). Table S23 shows the frequencies of all sub-haplogroups.

Because in the tree defined by<sup>42</sup> there is a strong association between most haplogroups and continental distribution, we performed the following assignment (Table S24). We considered as Eurasian (i.e. European for the purpose of the recent migration into Brazil), the haplogroups D, O, G, I, J, L, N, R and T, and the sub-haplogroups E1b1b1b1\* and E1b1b1b1b (common in Middle East and Jews, and in the Iberian Peninsula<sup>54</sup>). The most frequent European subhaplogroup is R1b1a2a (formerly R1b1b2) defined by L11 (rs9786076), described by<sup>55</sup> as a Western European subhaplogroup. The J clade ranks second among European haplogroups, particularly J2\*. Haplogroups A, B and E (except E1b1b1b1\* and E1b1b1b1b) are considered by us as Africans. Haplogroup Q is considered Native American. As in the case of mitochondrial DNA, this biogeographic classification has some limitations, because association between haplogroups and continents is not absolute. However, this biogeographic classification allows a reasonable quantification of the amount of continental admixture mediated by males during the last five centuries. A further issue in Y-chromosome continental assignment is the high frequency of the haplogroup "Root" in the Bambuí cohort. These individuals are classified as "Root" because does not hold any of the mutations that define the well-defined Y-chromosome haplogroups A-T. "Root" haplogroups are found both in Africa and Europe at low frequencies<sup>56</sup>. Thus, to determine whether ancestral origin of "Root" haplogroups found in EPIGEN cohorts were African or European we inferred the haplogroups of public domain Y chromosomes, using the same methodology described above. Thereafter we performed a PCA using common SNPs between 1000 Genomes populations and EPIGEN. Our results showed that all "Root" haplogroups from EPIGEN clustered with the European samples from 1000 Genomes classified as R haplogroup. Therefore, all "Root" haplogroups from EPIGEN were considered European.

We estimated Y-chromosome specific continental admixture in the same way than for mitochondrial DNA. The particularly high frequency of "Root" haplogroup in Bambuí determines the highest pairwise  $F_{ST}$  observed between Bambuí and Salvador or Pelotas (~13%, Table S22).

For Salvador, Bambuí and Pelotas, consistently with the results obtained for mitochondrial DNA, we observed a higher Y-chromosome (i.e. male mediated) continental European admixture than autosomal estimate. Again, this is due to the historical pattern of sex-biased preferential mating between males with predominant European ancestry with women with

predominant African or Native American ancestry (Table S20). Also, and consistently with autosomal estimates, Salvador has relatively higher percentage of African-associated haplogroups such as E1b1a (Table S23, >20% vs. <4% in Pelotas and Bambuí).

## 7. SNP ANNOTATION

We used the results of ADMIXTURE analysis with  $K=9$  to obtain SNP frequencies for the East-mustard and West-blue Africa clusters (EAFRxWAFR). We then estimated the  $F_{ST}$  values for each SNP. After that, we determined a 99% cut-off for the  $F_{ST}$  values which is 0.059 for the EAFRxWAFR SNPs. This resulted in 3,318 most differentiated SNPs between EAFRxWAFR, which were then annotated.

We used an annotation software developed by us, called MASSA, to perform annotation regarding *Diseases and Traits* from the GWAS Catalog (version March 2014), a database of genome-wide association studies hits for SNPs and Genes. The result shows 38 SNPs that are GWAs hits, as described in Table S25.

## 8. WHOLE GENOME DATA

### 8.1. Samples for Whole-Genome Sequencing and Quality Control

#### *Sampling*

We sequenced the complete genome of 30 Brazilians individuals using Illumina's methods (Illumina - Pub. No. 770-2007-002). We randomly selected 10 individuals from each of the EPIGEN cohorts, conditioning on availability of DNA quality and quantity. In total, we sequenced the genomes of eighteen men and twelve women overall. All DNA samples were obtained from peripheral leukocytes by four different DNA extraction methods (EZ-DNA isolation kit, Gentra Puregene Blood – QIAGEN, *salting-out* method, and phenol-chloroform method). A minimum of 1.75  $\mu\text{g}$  of DNA (stored in a solution of 35  $\mu\text{l}$ ) of each sample was sent to the Illumina facility in San Diego (CA, US), where it was sequenced with the HiSeq 2000 platform (Illumina - Pub. No. 770-2009-036) and genotyped for 2.5 million SNPs using the HumanOmni2.5-8 chip, for the purpose of an internal control by the Illumina LIMS (Laboratory Information Management System).

These are the codes of the individuals whole-genome sequenced: B0078, B0516, B0741, B0987, B0990, B1097, B1102, B1149, B1261, B1282, P0026, P0075, P0078, P0086, P0176, P0227, P0377, P2110, P2829, P2953, S0421, S0509, S0527, S0534, S0541, S0636, S0637, S0638, S0647, S0649. B, P and S codes corresponds to Bambuí, Pelotas and Salvador.

#### *Library construction*

Illumina generated paired-end libraries from 500ng-1 $\mu\text{g}$  of genomic DNA using the TruSeq DNA Sample Preparation Kit (Illumina's Catalog #: FC-121-2001; Pub. No. 770-2012-019). This step includes the purification of genomic DNA using magnetic beads (Agencourt®AMPure® XP reagents, Beckman Coulter), fragmentation of genomic DNA, and end-pairing of fragments of approximately 300 bp (Illumina's Catalog # PE-930-1001; Part # 1005063 Rev. E). Finally, an electrophoresis is used to confirm fragments size and DNA quality.

### **Clustering and Sequencing**

The Clustering procedure provides enough number of DNA molecules to be sequenced by the Illumina's HiSeq2000. For clustering, libraries are denatured, diluted, and clustered onto v3 flow cells using the Illumina cBot™ system (Illumina - Pub. No. 770-2009-032). This system promotes cDNA fragments amplification onto the surface of the flow cells. Fragments anneal with DNA template covalently bound onto the flow cells, where isothermal enzymes promote the extension of the attached DNA to create hundreds of millions of clusters, each containing around 1,000 identical copies of a single template molecule. cBot runs are performed based on the cBot User Guide (Illumina's Part#15006165 Rev. K), using the reagents provided in Illumina TruSeq Cluster Kit v3 (Illumina's Catalog #: PE-401-3001).

The flow cells are then loaded onto the HiSeq2000 for sequencing. Each run performs sequencing on 100 bp paired-end, non-indexed, following HiSeq 2000 User Guide, which requires using Illumina TruSeq SBS v3 Reagents. Briefly, two primers are used to sequence both ends of the fragment. While sequencing runs, each lane of the flow cell is controlled for quality to guarantee >80% of the bases with a Qscore>30. These controls are performed using manufacture's tools, such as Illumina HiSeq Control Software and Real-Time Analysis (RTA). These tools generate final sequencing files in .bcl format (Illumina - Pub. No. 770-2009-020), which comprises base callings and quality values by cycle.

### **Alignment and Variants Identification**

Sequencing files in .bcl format produced by the Illumina HiSeq Control Software and Real-Time Analysis (RTA) are the initial files used by Illumina on its standard data analysis pipeline. Illumina used CASAVA v1.9 (Consensus Assessment of Sequence and Variation) to convert the .bcl files to Fastq format and to map the reads against the reference genome NCBI37/hg19 (stored at the *Assembly* folder, inside the *Genome* and *bam* subdirectories), in order to identify SNPs (Single Nucleotide Polymorphisms) and INDELS (insertions and deletions). CASAVA performs sequencing alignment using the *configureAlignment* module, which comprises a set of scripts and protocols (CASAVA v1.8.2 User Guide - Part # 15011196 Rev D). The *configureAlignment* module includes the Illumina's ELAND (Efficient Large-Scale Alignment of Nucleotide Databases) alignment algorithm version 2 (Illumina – Pub. No. 770-2011-005). Alignment parameters used at CASAVA can be found at *Assembly/conf/project.conf* (more detailed information about parameters meaning can be found at CASAVA v1.8.2 User Guide - Part # 15011196 Rev D or at:

<http://umbc.rnet.missouri.edu/resources/How2RunCASAVA.html>).

After the alignment, reads of each genome are ordered by their positions and converted to BAM format (<http://samtools.sourceforge.net>). After this conversion to the BAM format, the CASAVA *assembleIndels* module is used to identify possible INDELS, and the *callSmallVariants* module to identify variants genotypes. For INDELS identification, CASAVA requires parameters to be provided, available at the *project.conf* file. The *callSmallVariants* module calls SNPs and small indels from both the sorted alignment files (*sorted.bam*) and optionally also from the candidate indel contigs produced by *assembleIndels*.

### **Illumina Array concordance - HumanOmni2.5-8v1**

Sequenced samples were also genotyped using the HumanOmni2.5-8 chip, as an Illumina internal control, and showed an average agreement of 99.27%.



### ***EPIGEN- QC analyses***

The VCF files generated for each genome were treated following quality parameters to build final datasets suitable for posterior analyses. VCF files have quality values based on Illumina's Qscores (Illumina – Pub. No. 770-2011-030) for each variant. This Illumina Qscore is generated according to a set of parameters, including base calling quality, its concordance with the reference genome, whether it is a beforehand known polymorphism, etc. We used a final Qscore  $\geq 20$  as cutoff to label variants as “PASS” and kept them in the file. In the EPIGEN project context, the VCF file was filtered using the software VCFtools<sup>46</sup> to create a final VCF file containing only those variants with Qscore  $\geq 20$ .

### ***EPIGEN VCF files filtering – SNPs variants***

Illumina generates specific VCF files for different types of variants, but only high quality SNPs were considered in the following analyses. To create a final dataset, we filter only the SNPs with a Qscore higher or equal to 20.

We fixed some inconsistencies regarding SNPs rs# identification numbers, such as same positions labeled with two or more different rs# numbers, which will produce error in analyses with GLU (<http://code.google.com/p/glu-genetics/>) and PLINK (<http://pngu.mgh.harvard.edu/purcell/plink/>). Also, the same rs# number was often registered for more than one physical position. We also evaluated the concordance between values of columns *max\_gt* and *poly\_max\_gt* of VCF files generated for each genome of the EPIGEN project. Only those variants that showed a concordant value were kept in the new VCF file, increasing the dataset reliability. Therefore, the final data set in VCF format was used in the following analyses.

### ***EPIGEN Data quality summary***

Each genome was sequenced on average 42x (mean deep coverage), with an average of 128 GB of passing filter and aligned to the reference genome (HumanNCBI37\_UCSC), 82% of bases with data quality Qscore $\geq 30$ , 96% of Non-N reference bases with a coverage  $\geq 10x$ , an HumanOmni5 array agreement of 99.53% and a HumanOmni2.5 array agreement of 99.27% (Table S26).

Figure S21 shows the Venn diagram of the distribution of the 15,033,927 biallelic SNPs identified in the 30 Brazilian genomes and its intersection with the databases dbSNP-138 and 1000 Genomes SNPs.

Figure S22 shows the distribution of the 15,033,927 identified SNPs in the three Brazilian cohorts.

## **8.2. Functional Annotation with ANNOVAR based on refGene**

Functional annotation of the whole-genome variants was performed using ANNOVAR (August 2013 release) with refGene v.hg19\_20131113 reference database and with ensGene v.hg19\_20131113 reference database. ANNOVAR classifies the variants into different categories considering their functions (Table S27). ANNOVAR and the other functional annotations described below were performed on the set of 15,033,927 SNPs (14 988 895 of them are biallelic).

SNPs annotation showed that most of the SNPs were classified as intergenic (58.03%) or intronic (34.88%), whereas the remaining variants were classified in other functional

categories (Fig. S23) including 101,201 SNPs (0.68%) in coding exonic regions of which 6,329 (6.25%) were not present at dbSNP138 neither at 1000 Genomes Phase1 database (hereafter called novel). We identified similar proportions of non-synonymous and synonymous exonic SNPs: 50,518 (49.91%) and 48,464 (47.88%) respectively (Tables S28 and S29), a result that is similar to other studies (Tables S28). Furthermore, of the 6,329 novel exonic SNPs, 99 (1.56%) were classified as stopgain SNPs, 1 as stoploss, 2,223 (35.12%) synonymous, 3,865 (61.07%) non-synonymous, and 141 (2.23%) as unknown.

To evaluate ANNOVAR's accuracy classifying the SNPs of 30 Brazilian genomes, we checked manually the annotation of 210 exonic SNPs in the dbSNP138 website. The results showed a high concordance between the ANNOVAR annotation and the dbSNP database since only for 1 SNPs (rs34179073) ANNOVAR and manual dbSNP checking produced inconsistent results. dbSNP gives a missense classification while ANNOVAR reports it as a synonymous mutation, once they annotate the variant based on different non-reference allele.

### 8.3. Functional annotations with other tools and databases

We also performed functional annotation using Variant Effect Predictor (VEP, v77, <http://www.ensembl.org/info/docs/tools/vep/index.html>), based on the Ensembl database (October 2014, release 77\_GRCh37) and RefSeq database (October 2014, release refseq\_vep\_77\_GRCh37). The Ensembl classification is based on the Table of functional categories available in [http://useast.ensembl.org/info/genome/variation/predicted\\_data.html#consequence\\_type\\_table](http://useast.ensembl.org/info/genome/variation/predicted_data.html#consequence_type_table).

Importantly, when there are multiple possibilities, VEP returns the annotation for the more severe category. However, it is possible to obtain the information with all the analyzed transcripts.

#### 8.3.1. Functional annotation using VEP (RefSeq)

Table S30 shows exonic SNPs classified by VEP (Ensembl) in the 30 Brazilian genomes.

#### 8.3.2. Functional annotation using ANNOVAR (Ensembl)

Table S31 shows exonic SNPs classified by ANNOVAR in the 30 Brazilian genomes.

### 8.4. Analysis of deleterious variants by CONDEL

First, we determined the ancestral-derived phylogenetic status for 45875 of the 49494 autosomal non-synonymous SNPs annotated with ANNOVAR and RefSeq database, by retrieving the ancestral allele information for each SNP from ancestral sequences files available in 1000 Genomes Project FTP site ([ftp://ftp.1000genomes.ebi.ac.uk/vol1/ftp/phase1/analysis\\_results/supporting/ancestral\\_alignments/](ftp://ftp.1000genomes.ebi.ac.uk/vol1/ftp/phase1/analysis_results/supporting/ancestral_alignments/)) using BEDTools suite v2.15 (<http://bedtools.readthedocs.org/en/latest/content/bedtools-suite.html>). Then, these 45875 variants were predicted for deleteriousness using CONDEL v2.0<sup>28</sup>, which calculates the scores for each SNP as a weighted average of the scores of MutationAssessor<sup>36</sup> and FatHMM<sup>37</sup>. Once CONDEL analysis fails for 869 SNPs, we, initially, treated the result file with 45006 hits removing 289 SNPs without CONDEL score. Because CONDEL shows the scores for all transcripts analyzed from the Ensembl database, we also excluded 700 SNPs with different predictions for more than one transcript. Thus, after applying these filters, our analysis included 44017 autosomal non-synonymous SNPs. We considered as deleterious mutations

the derived variants of those SNPs with a CONDEL score > 0.52, as recommended by the CONDEL authors.

Simons et al.<sup>30</sup> reported a bias in methods that detect deleterious variants based on phylogenetic comparisons. They evidenced that when the human reference allele is the derived one, methods that identify deleterious variants tend to underestimate its deleterious effect. We confirmed the presence of this bias in our CONDEL analysis. Table S32 reports the comparison of the CONDEL scores for the derived/reference and derived/non-reference variants across different allele frequency classes estimated from our 30 genomes. Consistently with<sup>30</sup>, across all the allele frequency classes, CONDEL scores are lower for the derived-reference than for the derived/non-reference alleles (Fig. S25). Therefore, we corrected the bias by the following procedure: for all the derived-reference variants, we added to the uncorrected CONDEL score, the value of the bias corresponding to its allele frequency class, where

$$\text{bias} = \text{CONDEL score}_{\text{derived/non-reference}} - \text{CONDEL score}_{\text{derived/reference}}$$

After this correction, we identified 8035 deleterious variants (versus 7451 before the correction), of which 6604 are rare deleterious variants (frequency < 0.10) and 79 are very deleterious variants (CONDEL score > 0.80) (Fig. S26).

## 9. REFERENCES

### **\*The texts corresponding to these references are only in this SI Appendix**

43. International HapMap 3 Consortium; et al. (2010) Integrating common and rare genetic variation in diverse human populations. *Nature* 467(7311):52–58. Q:25
44. 1000 Genomes Project Consortium; et al. (2012) An integrated map of genetic variation from 1,092 human genomes. *Nature* 491(7422):56–65.
45. Li JZ, et al. (2008) Worldwide human relationships inferred from genome-wide patterns of variation. *Science* 319(5866):1100–1104.
46. Danecek P, et al.; 1000 Genomes Project Analysis Group (2011) The variant call format and VCFtools. *Bioinformatics* 27(15):2156–2158.
47. Vicoso B, Charlesworth B (2006) Evolution on the X chromosome: Unusual patterns and processes. *Nat Rev Genet* 7(8):645–653.
48. Sousa VC, Fritz M, Beaumont MA, Chikhi L (2009) Approximate Bayesian computation without summary statistics: The case of admixture. *Genetics* 181(4):1507–1519.
49. Sokal RR, James RF (2012) *Biometry* (Freeman, New York), 4th Ed.
50. Excoffier L, Lischer HE (2010) Arlequin suite ver 3.5: A new series of programs to perform population genetics analyses under Linux and Windows. *Mol Ecol Resour* 10(3):564–567.
51. Badro DA, et al.; Genographic Consortium (2013) Y-chromosome and mtDNA genetics reveal significant contrasts in affinities of modern Middle Eastern populations with European and African populations. *PLoS ONE* 8(1):e54616.
52. Hernández CL, et al. (2014) Human maternal heritage in Andalusia (Spain): Its composition reveals high internal complexity and distinctive influences of mtDNA haplogroups U6 and L in the western and eastern side of region. *BMC Genet* 15:11.
53. Coelho M, Sequeira F, Luiselli D, Beleza S, Rocha J (2009) On the edge of Bantu expansions: mtDNA, Y chromosome and lactase persistence genetic variation in southwestern Angola. *BMC Evol Biol* 9:80.
54. Scozzari R, et al. (2014) An unbiased resource of novel SNP markers provides a new chronology for the human Y chromosome and reveals a deep phylogenetic structure in Africa. *Genome Res* 24(3):535–544.
55. Rocca RA, et al. (2012) Discovery of Western European R1b1a2 Y chromosome variants in 1000 genomes project data: An online community approach. *PLoS ONE* 7(7):e41634.

56. Mendez FL, et al. (2013) An African American paternal lineage adds an extremely ancient root to the human Y chromosome phylogenetic tree. *Am J Hum Genet* 92(3):454–459.
57. Lachance J, et al. (2012) Evolutionary history and adaptation from high-coverage whole-genome sequences of diverse African hunter-gatherers. *Cell* 150(3):457–469.
58. Shen H, et al. (2013) Comprehensive characterization of human genome variation by high coverage whole-genome sequencing of forty four Caucasians. *PLoS ONE* 8(4):e59494.

## 10. FIGURES

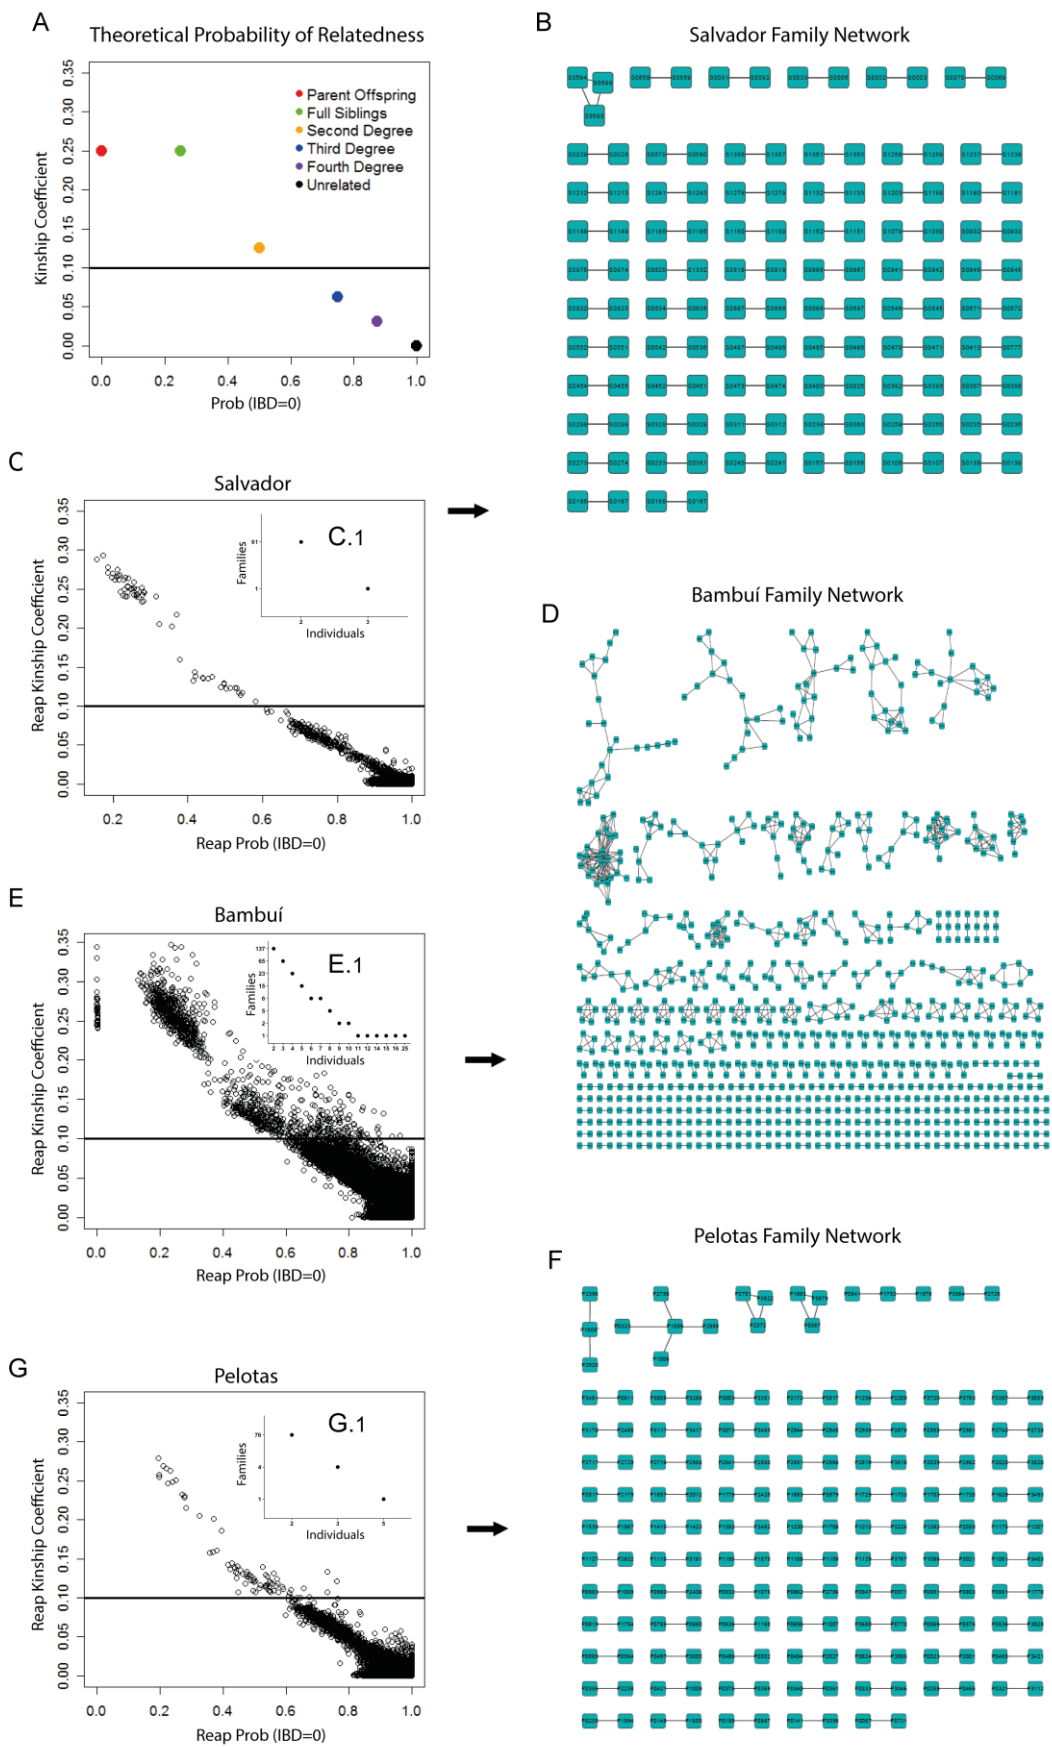

**Figure S1. Relatedness in the EPIGEN cohorts.** (A) The combination of theoretical values of kinship coefficients and the probability that individuals  $i$  and  $j$  share zero identical-by-descent

alleles (IBD=0) for different degrees of relatedness. These combinations describe the proportion of IBD genomic regions shared by two blood relatives. A pair of first-degree relatives (parent/offspring or full siblings) are IBD for about half of their genome. A second-degree relative of a person (uncle/aunt, nephew/niece, grandparent/grandchild or half-siblings) is IBD for about one quarter of their genomes. A third degree relative of a person (a first cousin and great-grandparent/great-grandchild) is IBD for about one eighth of their genomes. C, E and G plot kinship coefficient on the vertical axis and IBD=0 on the horizontal for Salvador, Bambuí, and Pelotas, respectively. The thick lines in the plots represent a “family”-kinship coefficient threshold  $\Phi_{ij} \geq 0.1$  established to consider individuals as related or not. B, D and F are the Salvador, Bambuí and Pelotas family networks, in this order. We model the families within each cohort like a network, where each node is an individual who connects to others by edges, which represent kinship coefficients  $\geq 0.1$ .

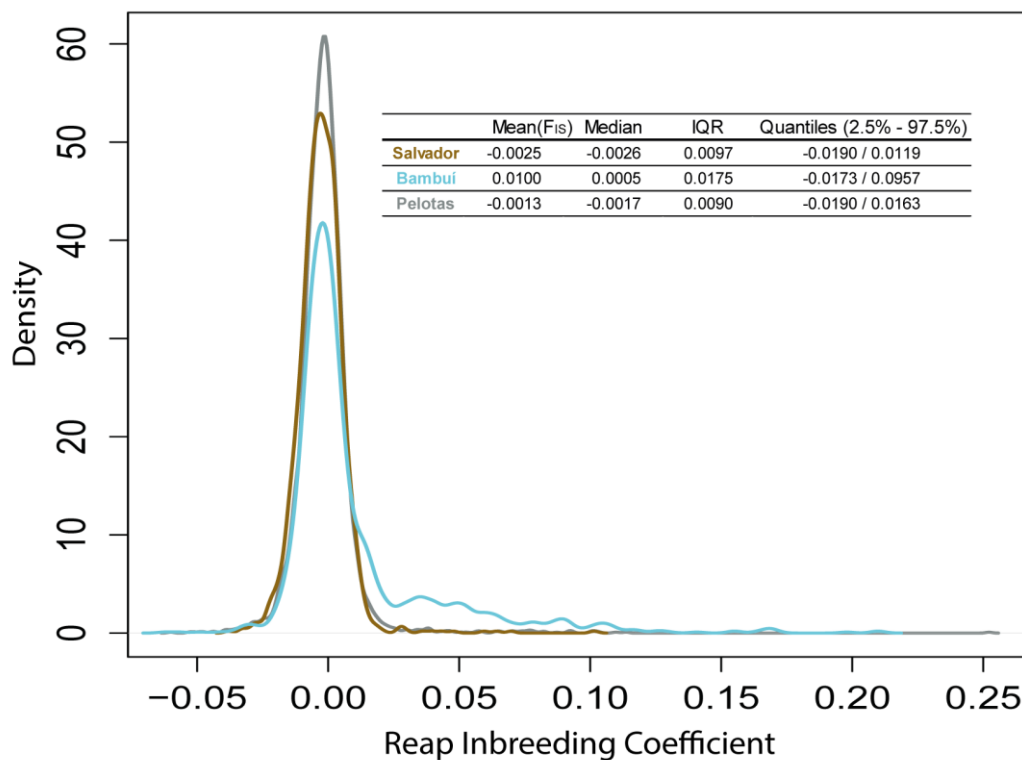

**Figure S2. REAP Inbreeding Coefficient.** Distribution of individual inbreeding coefficients in the EPIGEN populations estimated using REAP software.  $F_{IS}$  is the mean of the inbreeding coefficients across individuals. IQR = interquartile range.

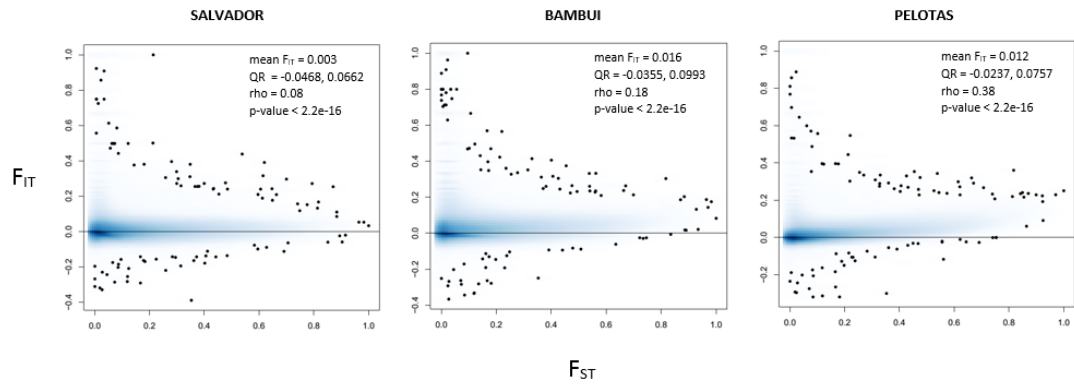

**Figure S3. Homozygosity vs Informativeness for ancestry.** The smoothed scatter plots represent the association between homozygosity excess and informativeness for ancestry. Homozygosity excess was measured by the  $F_{IT}$  per SNP estimated for each population. Informativeness for ancestry was measured by the  $F_{ST}$  per SNP estimated between the African and European populations. In the upper-right of the plot, we report the mean  $F_{IT}$  for the population cohort and the Spearman correlation parameter  $\rho$  (cor.test function in R) between  $F_{IT}$  and  $F_{ST}$ . QR = quartile range.



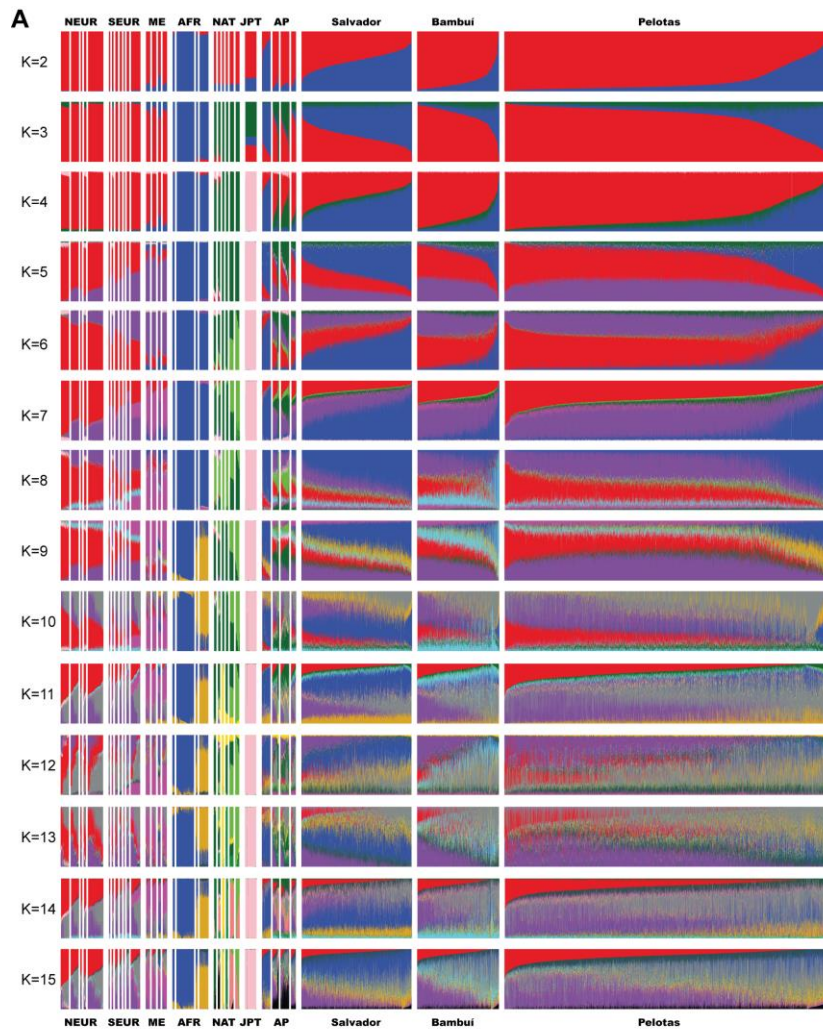

| NEUR           | SEUR           | ME            | AFR         | NAT                | JPT        | AP                    |
|----------------|----------------|---------------|-------------|--------------------|------------|-----------------------|
| (South Europe) | (North Europe) | (Middle East) | (Africa)    | (Native Americans) | (Japanese) | (Admixed Populations) |
| FIN            | IBS            | Bedouin       | West Africa | Pima               | Japanese   | ASW                   |
| GBR            | Adygei         | Druze         | Mandenka    | Maya               | JPT        | CLM/Columbians        |
| Crospan        | French         | *Mozabite*    | Yoruba      | Sundi              |            | MEK/MXL               |
| Russian        | French B.      | Palestinian   | YRI         | Keritana           |            | PUR                   |
| N. Italian     | Sardinian      |               | East Africa | Ashaninkas         |            |                       |
| CEU            | TSI/Tuscan     |               | Bantu       | Shanmas            |            |                       |
|                |                |               | LWK         |                    |            |                       |

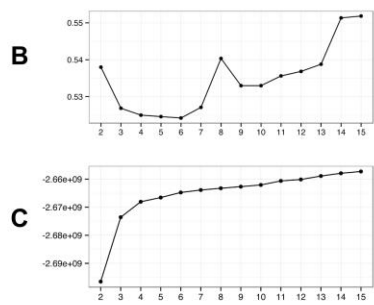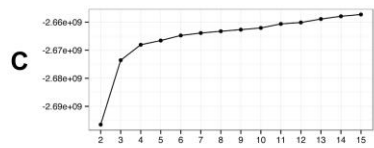

**Figure S4. Barplot representation of the individual ancestry proportion for unrelated individuals inferred using ADMIXTURE.** The proportions of Individual ancestry values were calculated using the number of parental  $K = 2$  to  $K = 15$  for the Dataset U (the main dataset used to study the population structure of the EPIGEN populations). Ancestral populations are sorted so that each one is assigned to an ethnic/geographic group, like North Europe, Middle East and Native American. The populations of each ethnic/geographic group are described at the bottom of the figure in the same order as plotted. Each bar represents an individual and each color a specific ancestry cluster. Barplots are sorted for each  $K$  by decreasing amount of the red ancestry cluster in the EPIGEN populations and individuals are not vertically aligned across the Figure. \*Mozabite is a northwestern African population. ADMIXTURE cross-validation errors (B) and Log-likelihoods (C) as a function of  $K$ . Results corresponds to A.

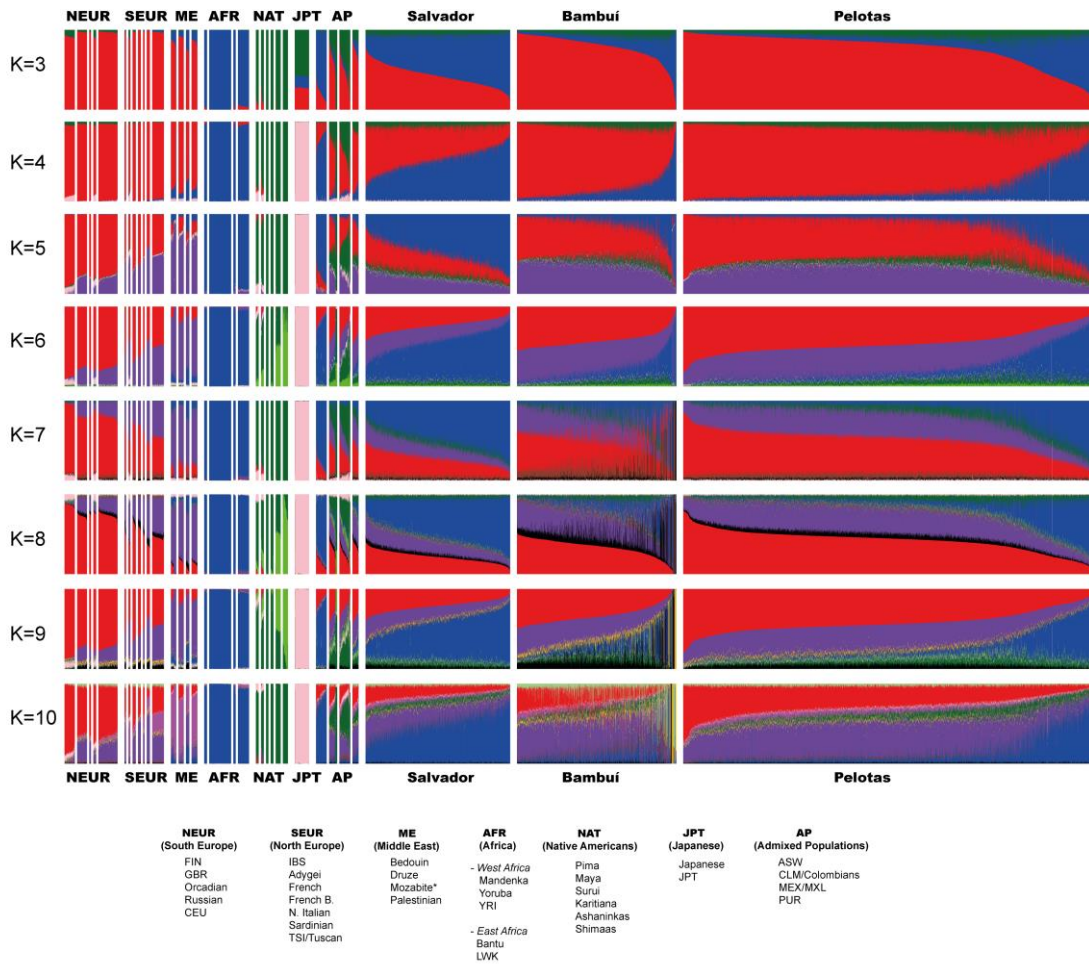

**Figure S5. Barplot representation of the individual ancestry proportions for all EPIGEN individuals.** The proportions of Individual ancestry values were calculated using the number of parental clusters  $K = 3$  to  $K = 10$  for the Original Dataset. Ancestral populations are sorted so that each one is assigned an ethnic/geographic group, like North Europe, Middle East and Native American. The populations of each ethnic/geographical group are described at the bottom of figure in the same order as plotted. Each bar represents an individual and each color a specific ancestry cluster. Barplots are sorted for each  $K$  by decreasing amount of the red ancestry cluster in the EPIGEN populations and individuals are not vertically aligned across the Figure. \*Mozabite is a northwestern African population.

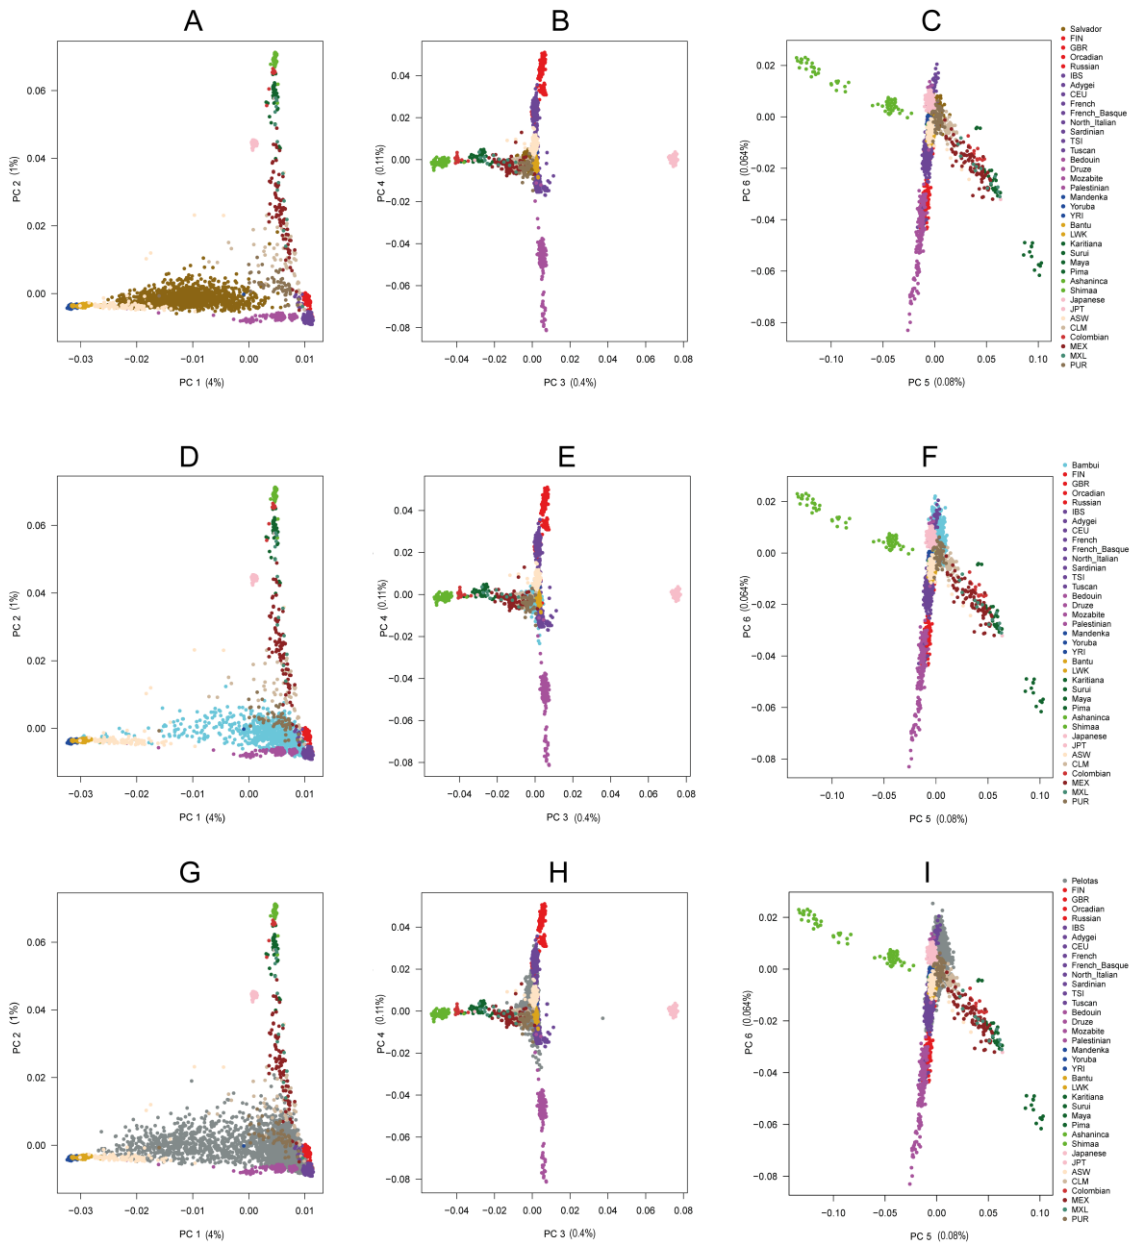

**Figure S6. Principal Component Analysis (PCA) for EPIGEN and worldwide populations.** PCA and the percentage of variability identified by each PC for Dataset U (the main dataset used to study the population structure of the EPIGEN populations, that does not include relatives), representing the worldwide populations and Brazil Northeast (Salvador), Southeast (Bambui) and South (Pelotas) populations.

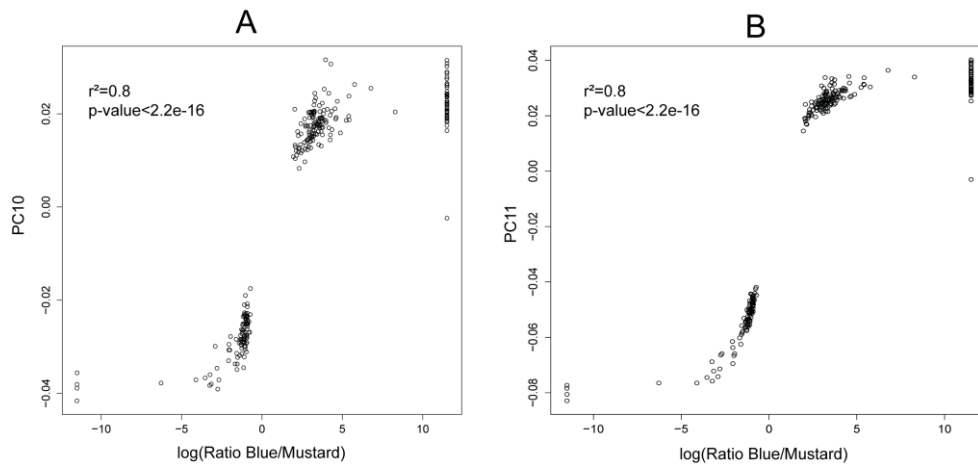

**Figure S7. Correspondence between sub-continental African ancestry clusters identified by ADMIXTURE and by Principal Component Analysis.** Scatterplot of the logarithm of the ratio between the blue and mustard sub-continental Africa ancestry clusters obtained from ADMIXTURE analyses (K=9) in each Brazilian individual from the EPIGEN cohorts (horizontal axes), versus the individual coordinate in the 10<sup>th</sup> (PC10, A) and 11<sup>th</sup> (PC11, B) Principal Components (vertical axes), estimated using the Dataset U (i.e. that contain no relatives). We estimated the association using Pearson's product-moment correlation coefficient. The high correlation suggest that Principal Components 10 and 11 capture the information of the within-African ancestry clusters, being correlated with the proportion of the blue ancestry component.

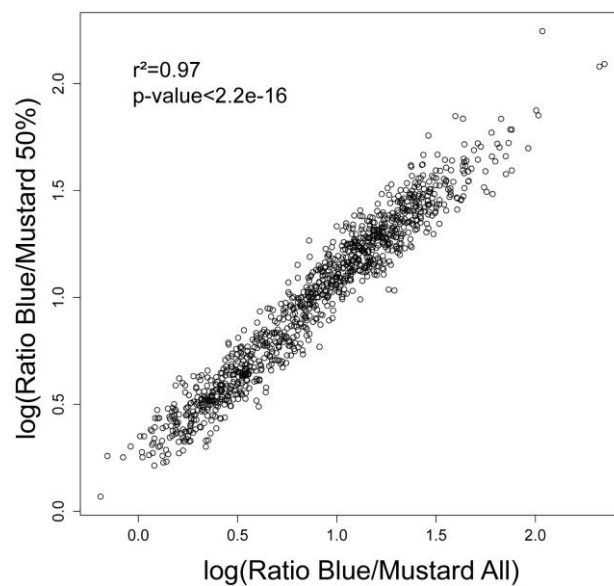

**Figure S8. Logarithm of the ratio between the sub-continental African ancestry clusters.** Testing the consistency of estimates of within-Africa ancestry clusters in function of total African ancestry. Scatterplot of the logarithm of the ratio between the blue and mustard sub-continental Africa ancestry clusters obtained from ADMIXTURE analyses (K=9) for the individuals from the EPIGEN populations with more than 50% of total African ancestry, estimated using the Dataset U (that contain no relatives). In the horizontal axis is represented the estimates obtained from ADMIXTURE when the run was performed including all the individuals (independently of their amount of African admixture). In the vertical axis is represented the estimates obtained from and ADMIXTURE analysis using only individuals with >50% of total African ancestry. The high Spearman correlation suggests that the estimates of

the blue and mustard within-Africa cluster of ancestry do not depend on the level of individual total African ancestry.

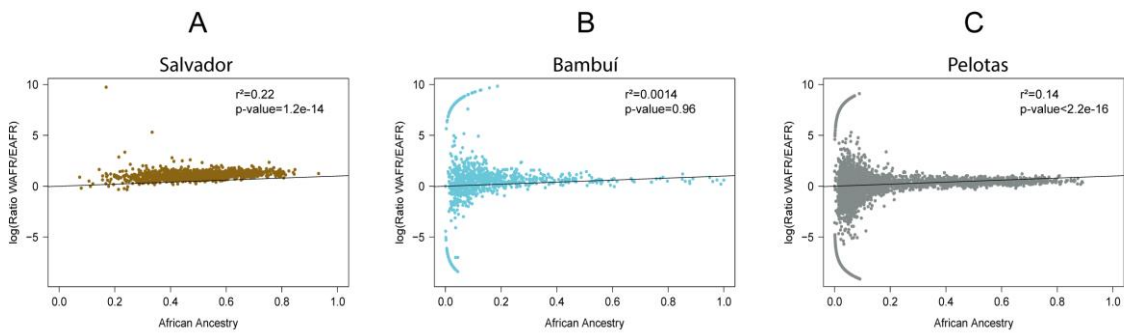

**Figure S9. Testing correlation between sub-continental African ancestry clusters and total African ancestry in the EPIGEN cohorts.** Scatterplot of the logarithm of the Blue/Mustard ancestry components ratio and the total African ancestry of individuals from Salvador (A), Bambuí (B) and Pelotas (C). We used Pearson's product-moment correlation coefficients to measure these correlations. In Salvador and Pelotas, individuals with more total African ancestry, tend to have proportionally more of the Blue ancestry cluster, which is associated to West Africa and non-Bantu populations.

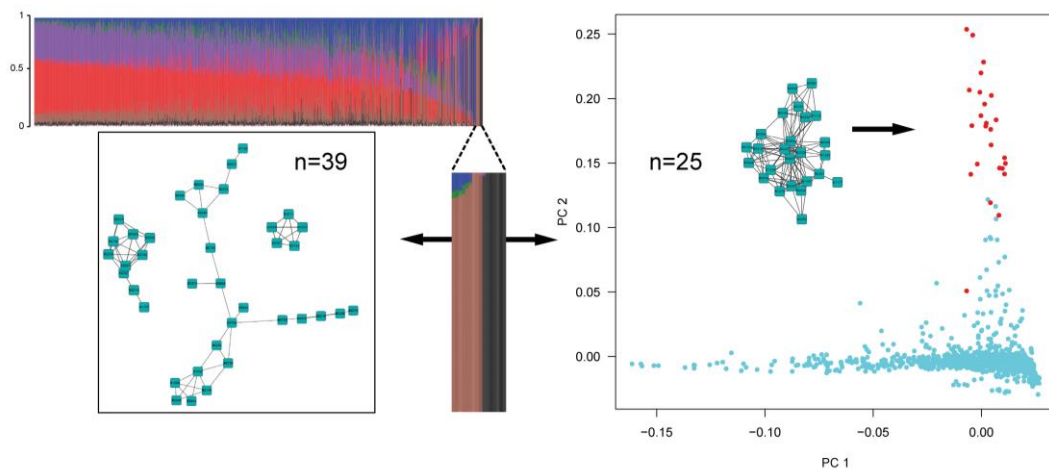

**Figure S10. Familiar structure in Bambuí consistently identified by REAP, ADMIXTURE and Principal Component Analysis (PCA).** When we used the entire set of EPIGEN individuals (Original Dataset), ADMIXTURE (K=7) identifies ancestry clusters (brown and black) that match a set of relatives identified by REAP kinship analysis and by our network approach (Section 6). Individuals from the black cluster were also identified by the second component of the PCA (red points) performed only for the Bambuí cohort.

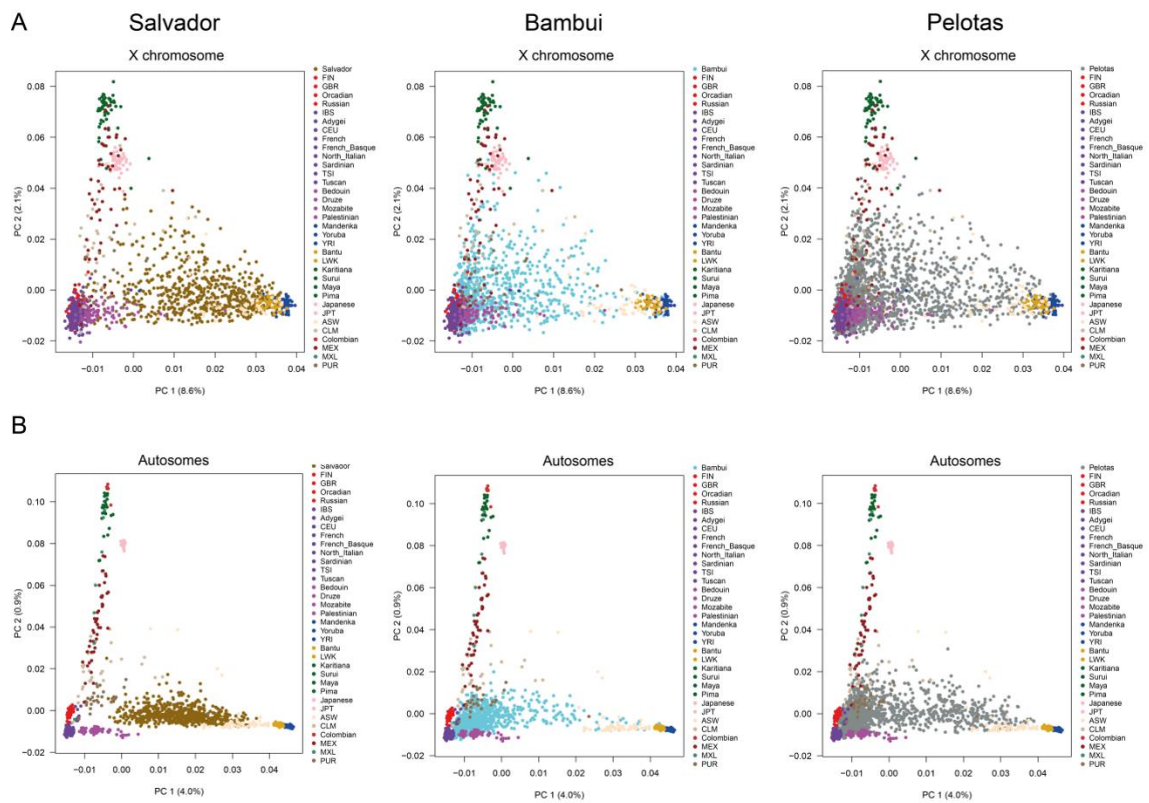

**Figure S11. Principal Component Analysis of three Brazilian cohorts. (A)** using X-chromosome SNPs and **(B)** autosomal markers for the same female individuals. Population acronyms are the same than in Figure 1.

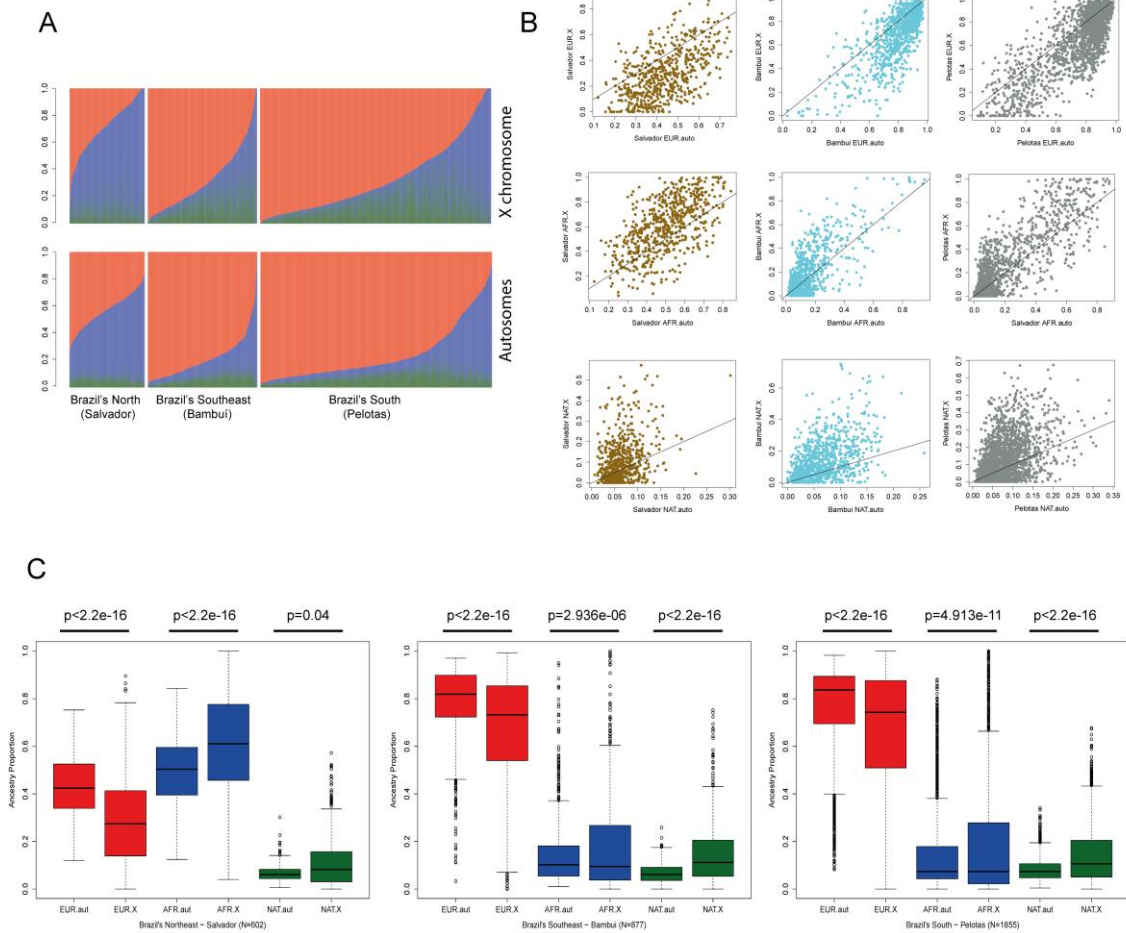

**Figure S12. ADMIXTURE analysis on the X-chromosome and autosomal SNPs the on same females from the Brazilian EPIGEN populations, using the same set of parental populations.** (A) Clusters obtained for K=3 (unsupervised mode) (B) Scatterplot of inferred autosomal continental ancestry (horizontal axis) vs. inferred X-chromosome continental ancestry for each individual analysed. (C) Boxplot of the distribution of continental ancestry for autosomes and X-chromosome data (p-value obtained by Wilcoxon Signed Rank Test on top). Res: European, Blue: African, Green: Native American ancestries.

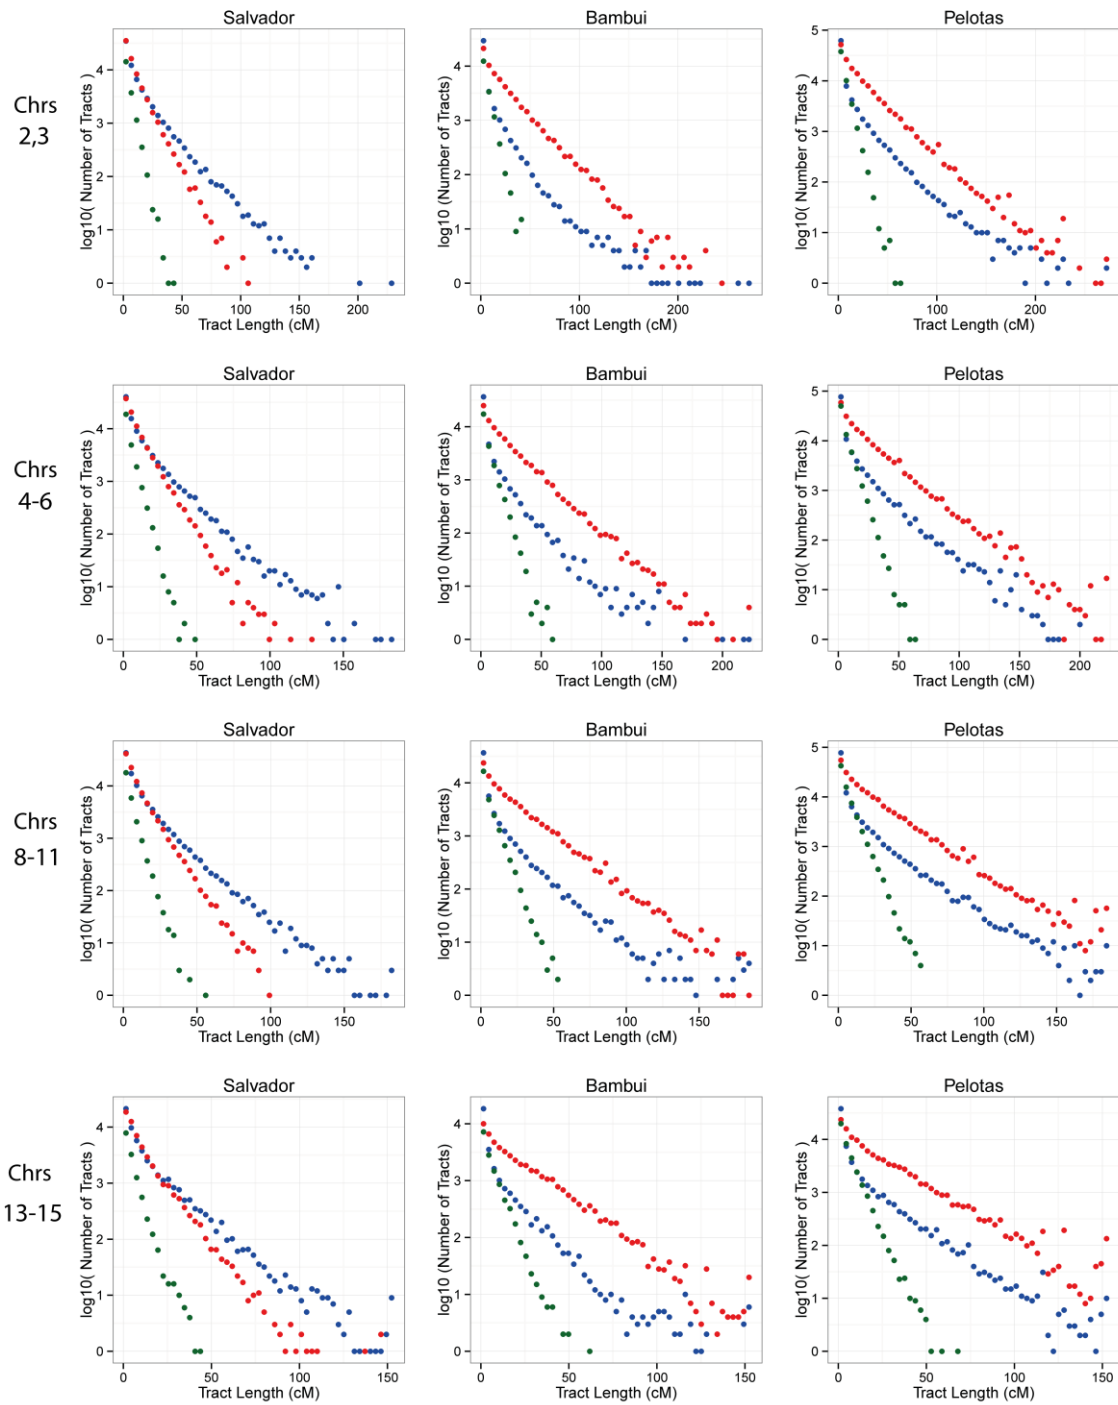

**Figure S13. The distribution of lengths of chromosomal segments of continuous specific ancestry (CSSA) across the genome calculated for Salvador, Bambuí and Pelotas.** CSSA lengths are organized in 50 equally spaced bins per population. We represented different sets of chromosomes with similar length. Green: Native American, Blue: African, Red: European ancestries.



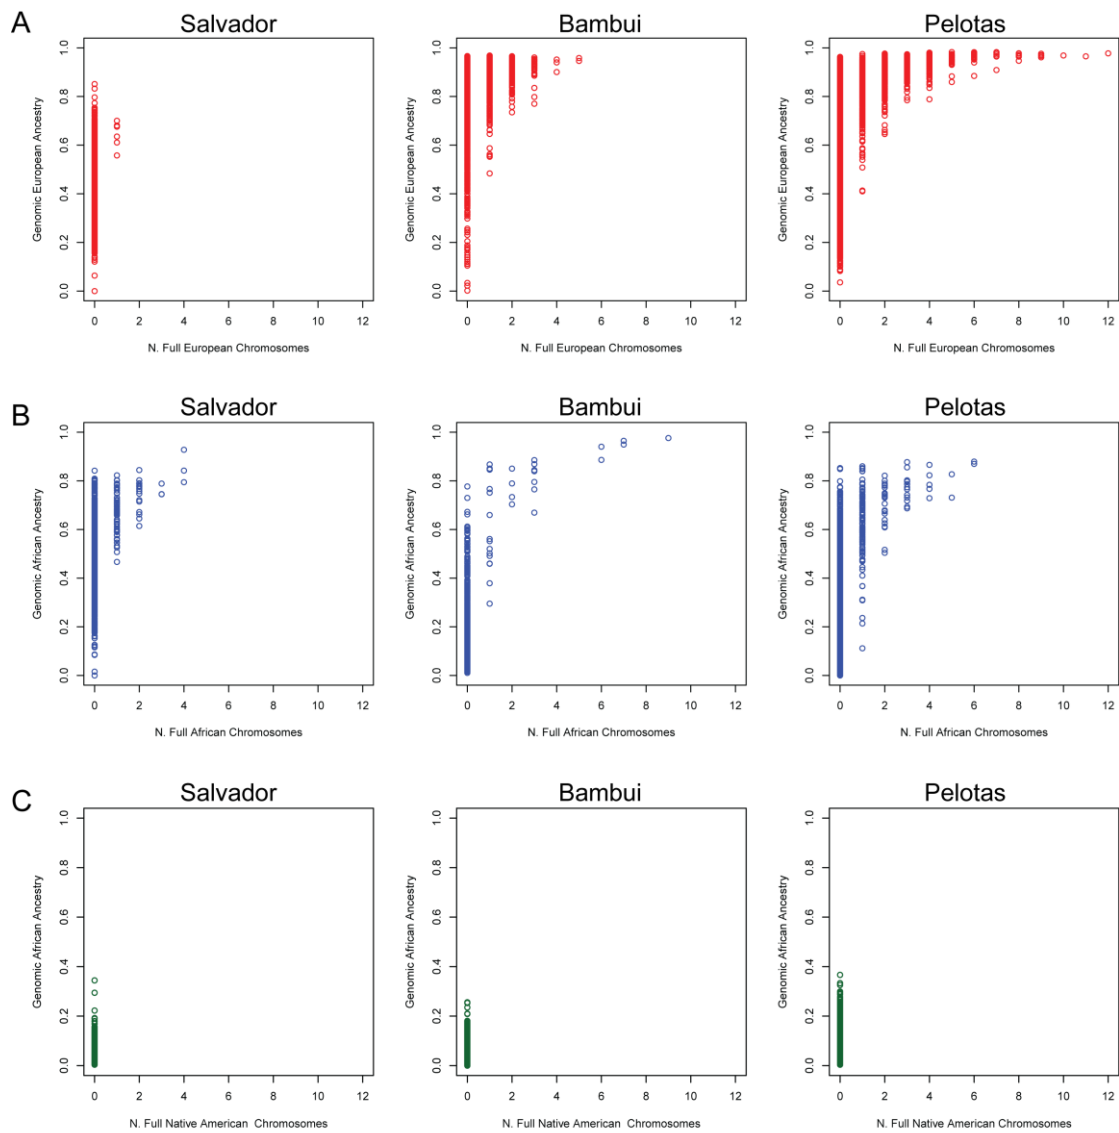

**Figure S14. Observed number of full chromosomes from a unique European (A), African (B) and Native American (C) ancestry (horizontal axis) and total individual genomic ancestry (vertical axis).**

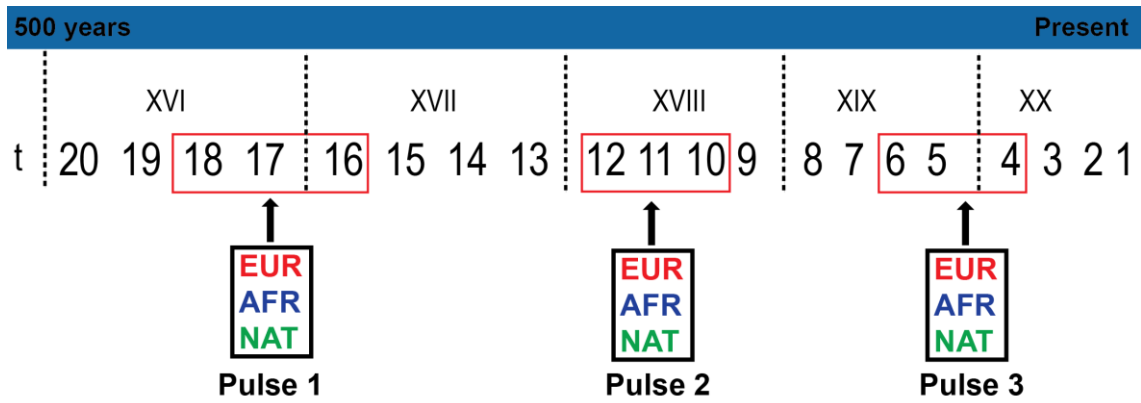

**Figure S15. Admixture dynamics model for Brazil.** Pulses of early (1), intermediate (2) and recent (3) continental admixture along the last five centuries (roman numbers) considered in the admixture dynamics model.  $t$  corresponds to the number of past generations and each generation corresponds to 25 years.

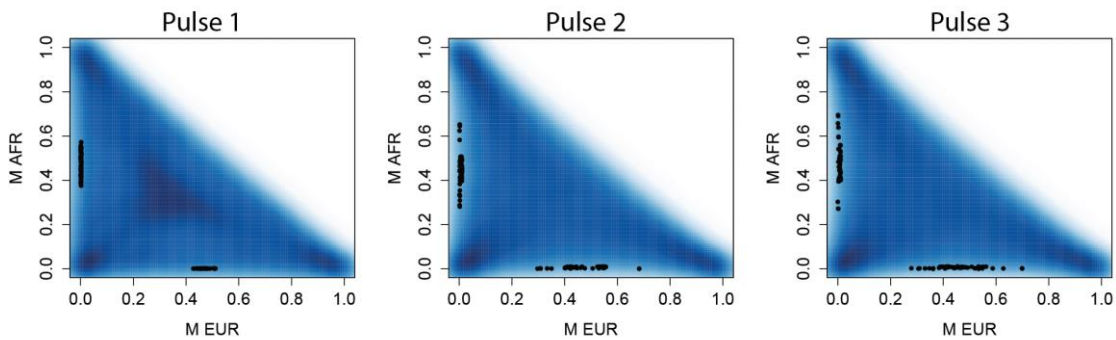

**Figure S16. Exploring all the M space from a uniform  $m$  over the three pulses.** The EUR and AFR  $M$  (cumulative population mean proportion of ancestry) space generated from uniform values of  $m$  (proportions of immigrants per pulse) over the  $m$  interval  $[0,1]$ , as described in the text and over the three admixture pulses. This result suggests that the space of  $M$  values is adequately explored.

---

**Algorithm 1:** The simulator of  $m_{N,P,O}$  parameters

---

**Input:** A finite set  $Population = \{pop_1, pop_2, \dots, pop_n\}$  with the name of ancestral population size  $P$   
**Input:** The integer number of pulses  $N$   
**Output:** The set of  $m$  for each  $N$  pulse for each  $P$  ancestral population and how the ancestral population are sorted for each pulse

```

/* Initializing the  $M_{N,P}$  with 0 */
1 for  $n \leftarrow 0$  to  $N$  do
2   for  $p \leftarrow 1$  to  $P$  do
3      $M_{n,pop_p} \leftarrow 0$ 
4 for  $n \leftarrow 1$  to  $N$  do
   /* Start of the generation of  $m_{N,P,O}$  values */
   /* The  $N$  value is the respective pulse */
   /* The  $P$  value is the respective ancestral population */
   /* The  $O$  value is the order of arrival */
   /* The  $m_{1,NAT,1}$  shows the value of  $m$  in pulse 1 to ancestral population  $NAT$  which was the first to arrive */
5   for  $p \leftarrow 1$  to  $P$  do
6     if  $n = 1$  and  $p = 1$  then
7       /* The first population of the first pulse has the pulse equals 1 */
7        $r$  receives a integer random number between  $1..P$ 
8        $m_{1,pop_r,1} \leftarrow 1$ 
9     else
10       $r$  receives a integer random number not chosen yet in this pulse between  $1..P$ 
10      /* This restriction is to prevent a population arrives more than one time per pulse */
11
12       $migration\_rate$  receives a real random number between  $(0..1)$  where  $SUM(m_{n,,}) + migration\_rate \leq 2$  if  $n = 1$ 
12      or  $SUM(m_{n,,}) + migration\_rate \leq 1$  if  $n \neq 1$ 
12      /*  $SUM(m_{n,,})$  means the sum of all arrives in pulse  $n$ . This restriction is to prevent the
12      entire population is overlapped by another in the same pulse. The value of sum of arrivals
12      in the first pulse can be bigger than 1 because the first arrival has the value equal 1
12      */
13
14       $m_{n,pop_r,p} \leftarrow migration\_rate$ 
15
16      /* Calculate the  $M_n$  values */
17
18      for  $k \leftarrow 1$  to  $P$  do
19        for  $p \leftarrow 1$  to  $P$  do
20          /* This if means "if the population that arrived is the same as I'm updating the values" */
21          if  $EXISTS(m_{n,pop_p,k})$  then
22             $M_{n,pop_p} \leftarrow M_{n-1,pop_p} - (M_{n-1,pop_p} * m_{n,pop_p,k}) + m_{n,pop_p,k}$ 
23          else
24             $M_{n,pop_p} \leftarrow M_{n-1,pop_p} - (M_{n-1,pop_p} * m_{n,pop_p,k})$ 
25
26 for  $n \leftarrow 1$  to  $N$  do
27   for  $k \leftarrow 1$  to  $P$  do
28     for  $p \leftarrow 1$  to  $P$  do
29       if  $EXISTS(m_{n,pop_p,k})$  then
30         Print in output file " $pop_p$   $m_{n,pop_p,k}$ "

```

---

**Figure S17.** Pseudocode to generate the distribution of the parameters of the demographic model of admixture used for the admixture dynamics inferences. The parameters are  $m$  (proportions of immigrants) and  $M$  (proportion of ancestry) conditioned on the observed continental admixture.

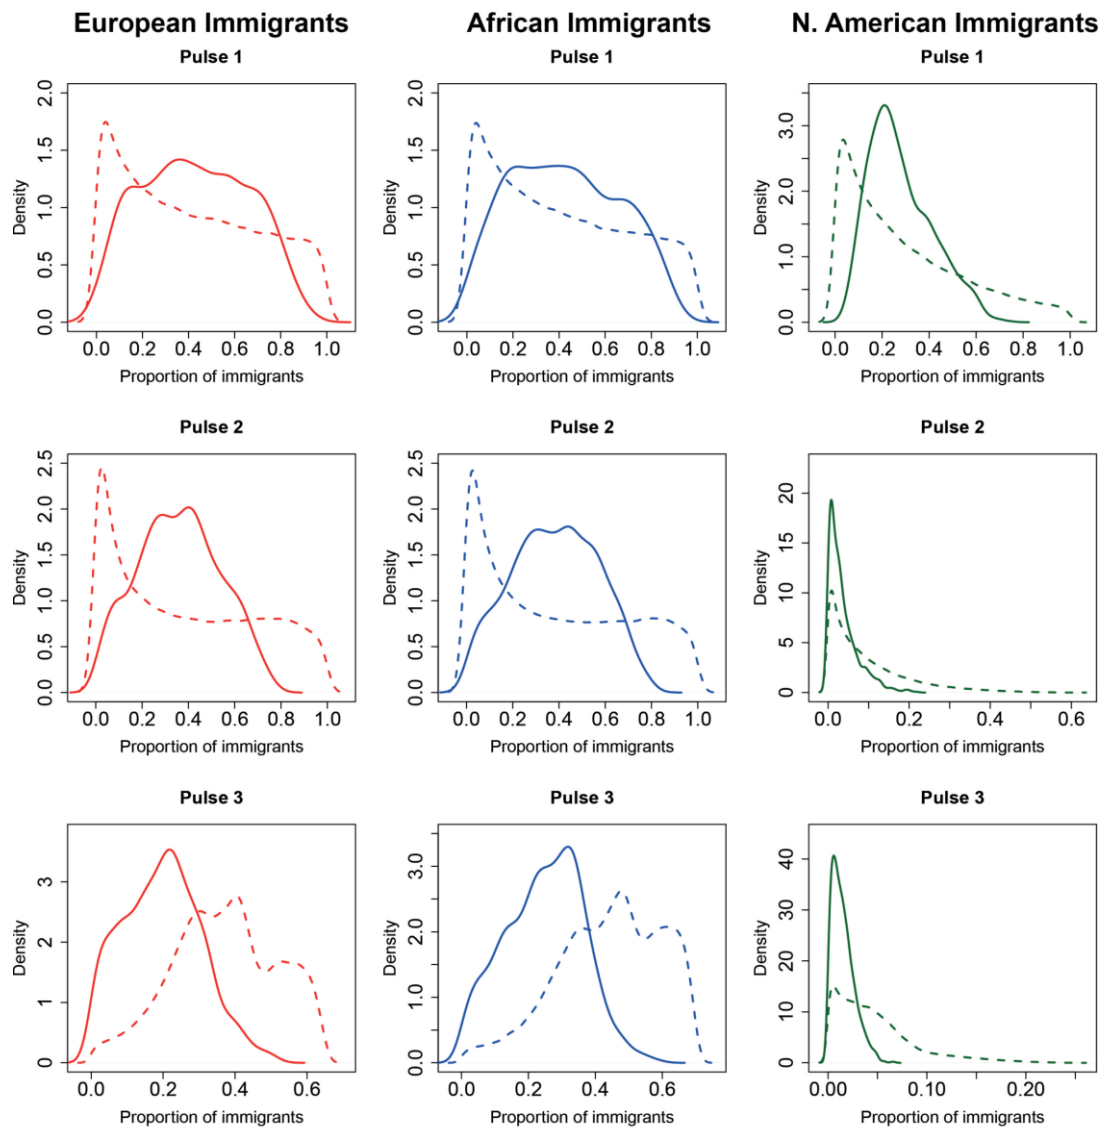

**Figure S18. Posterior probability distributions of the 9  $m_{n,p}$  (Admixture parameters) for Salvador (Northeastern Brazil) population.** The prior (dashed lines) and posterior (solid lines) probability densities of the parameters  $m_{n,p}$  were estimated by Approximate Bayesian Computation. The Pulses 1, 2 and 3 refers to 18-16, 12-10 and 6-4 generations ago, respectively. The red lines corresponds to  $m_{European,p}$ , blue lines ( $m_{African,p}$ ) and green lines ( $m_{N. American,p}$ ).

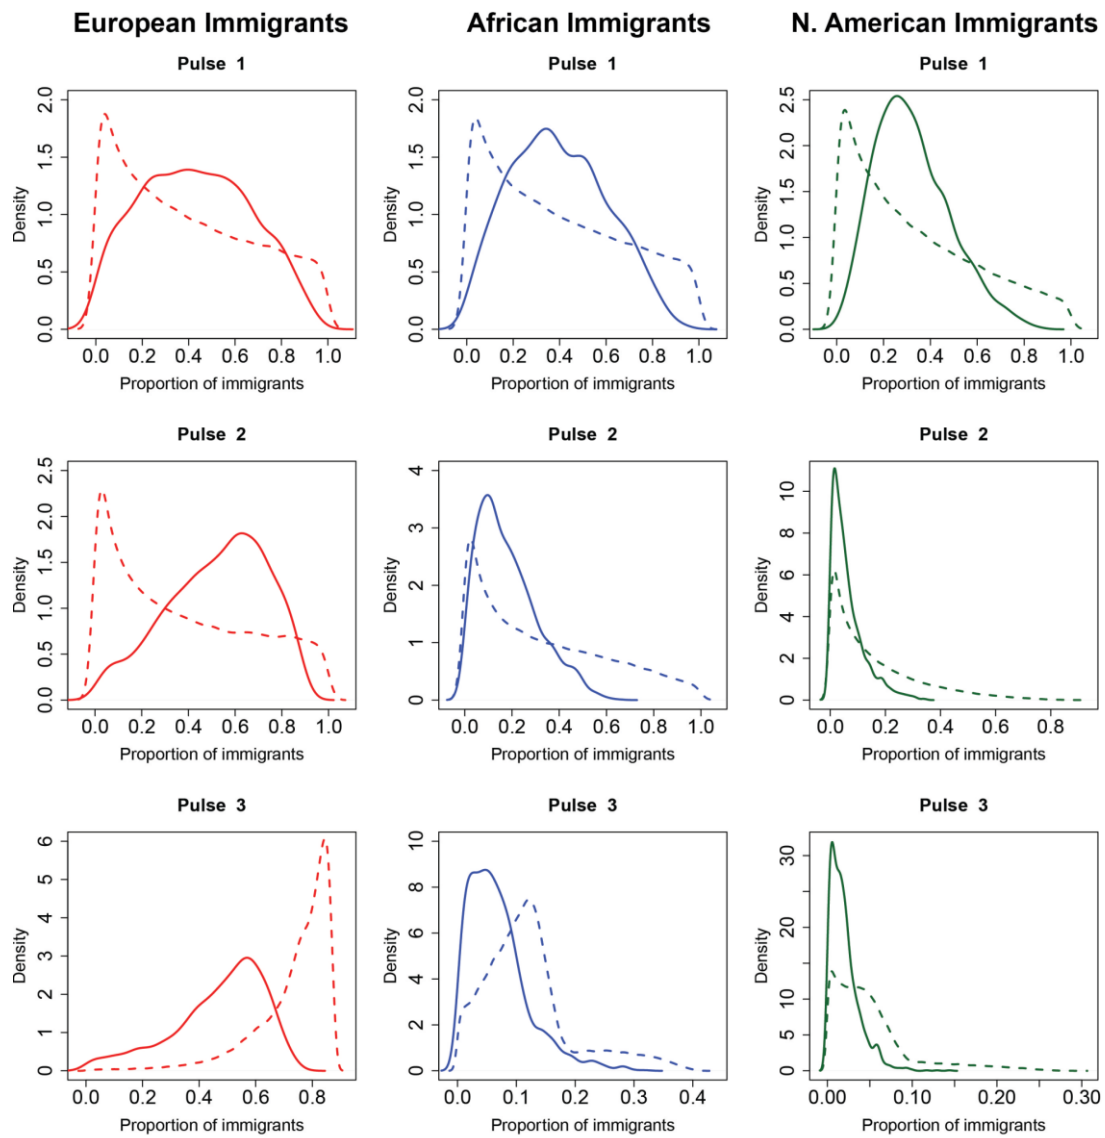

**Figure S19. Posterior probability distributions of the 9  $m_{n,p}$  (Admixture parameters) for Bambuí (Southeastern Brazil) population.** The prior (dashed lines) and posterior (solid lines) probability densities of the parameters  $m_{n,p}$  were estimated by Approximate Bayesian Computation. The Pulses 1, 2 and 3 refers to 18-16, 12-10 and 6-4 generations ago, respectively. The red lines corresponds to  $m_{Europeans,p}$ , blue lines ( $m_{African,p}$ ) and green lines ( $m_{N. American,p}$ ).

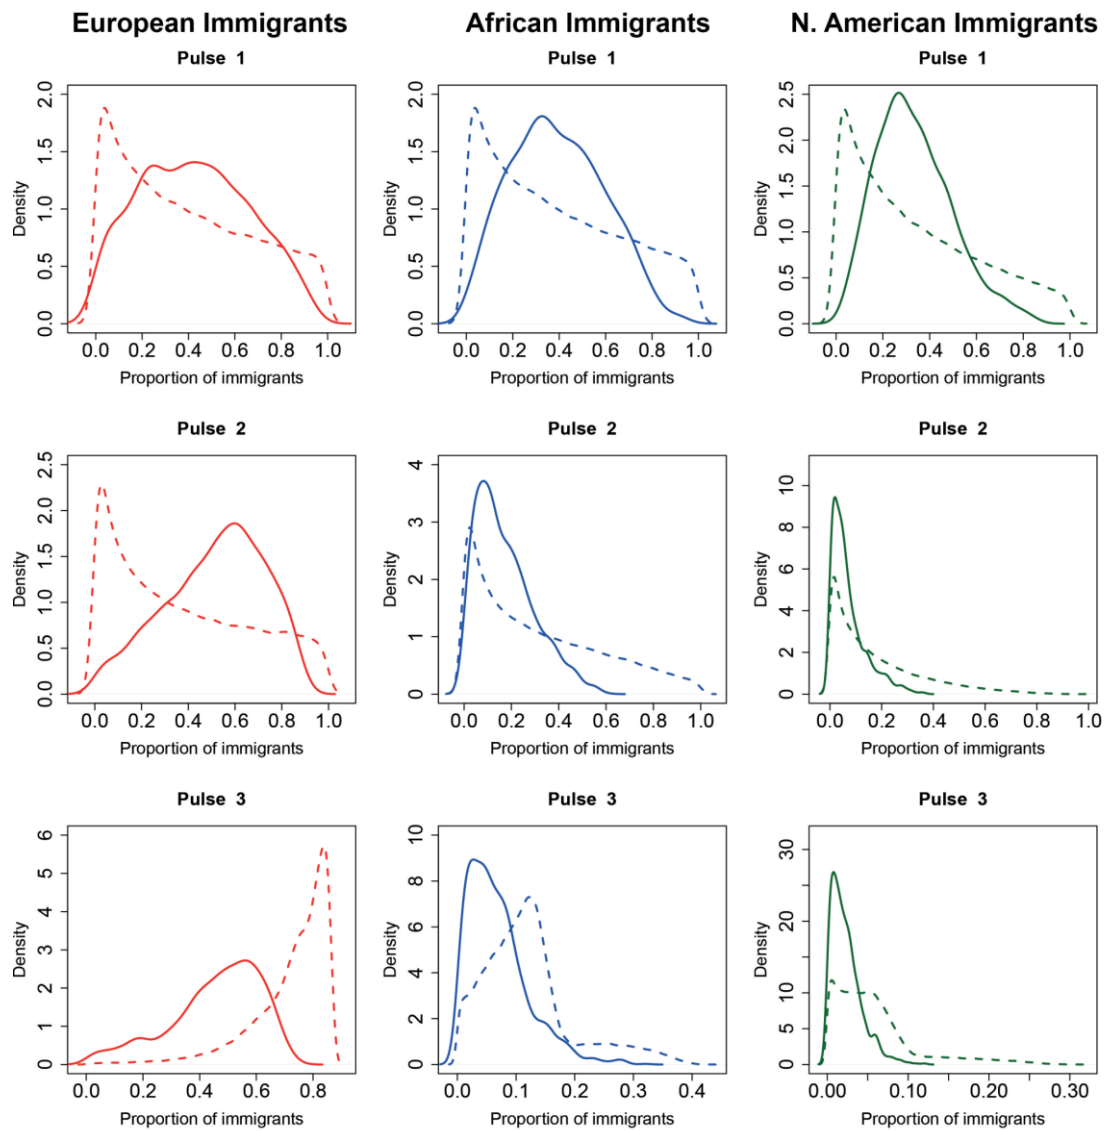

**Figure S20. Posterior probability distributions of the 9  $m_{n,p}$  (Admixture parameters) for Pelotas (Southern Brazil) population.** The prior (dashed lines) and posterior (solid lines) probability densities of the parameters  $m_{n,p}$  were estimated by Approximate Bayesian Computation. The Pulses 1, 2 and 3 refers to 18-16, 12-10 and 6-4 generations ago, respectively. The red lines corresponds to  $m_{Europeans,p}$ , blue lines ( $m_{African,p}$ ) and green lines ( $m_{N. American,p}$ ).

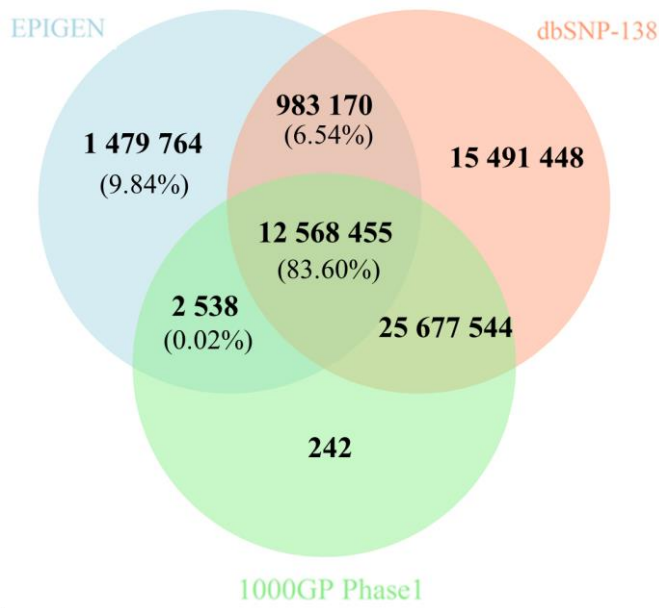

Figure S21. Venn diagram of the distribution of the 15,033,927 SNPs identified in the 30 Brazilian genomes and the intersection with the databases dbSNP-138 and 1000 Genomes Phase 1 SNPs. Percentages refer to the EPIGEN SNPs.

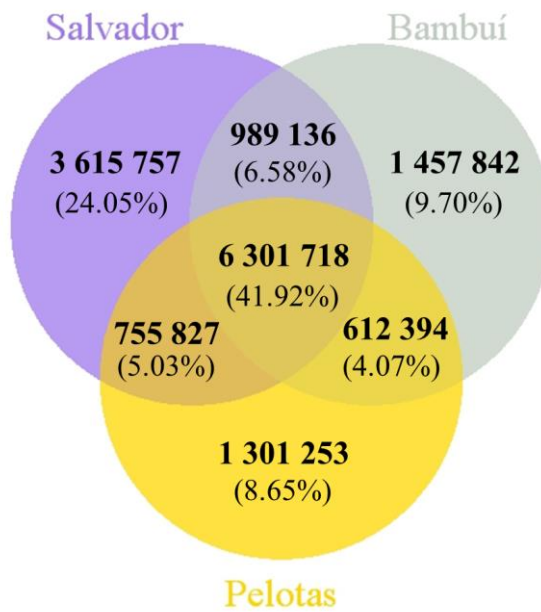

Figure S22. Distribution of the 15,033,927 SNPs identified in the 30 Brazilian genomes among the three studied Brazilian populations.

### Classification of SNPs based on ANNOVAR annotation

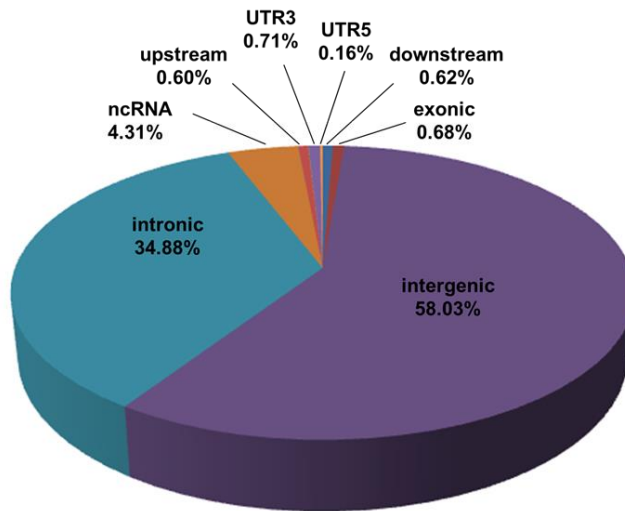

**Figure S23. Distribution of biallelic SNPs based on their functional annotation by ANNOVAR using RefSeq database.** The (upstream, downstream) category (0.02%) does not appear in the graphic. The (upstream, downstream) variants are located both downstream and upstream region (possibly for 2 different genes).

### Histogram

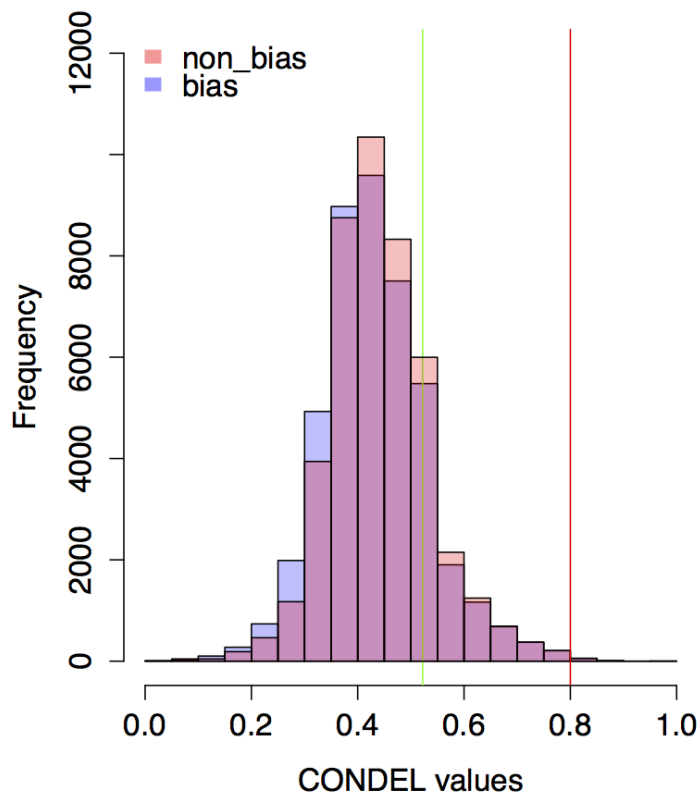

**Figure S24. Condel scores distribution of autosomal non-synonymous SNPs with bias and with bias correction.** The cutoff of 0.52 for deleterious variants is showed by the green line and the cutoff of 0.80 for very deleterious variants is showed by the red line.



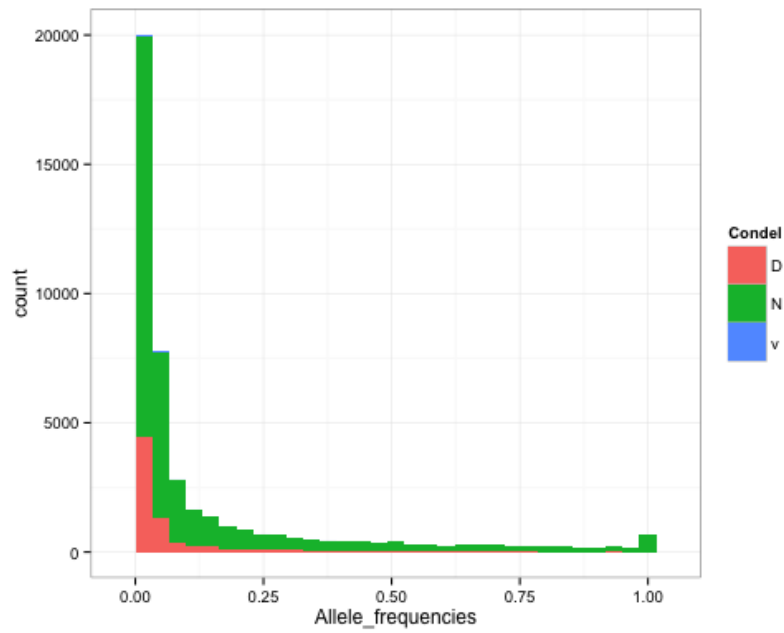

Figure S25. Allele frequency spectrum of autosomal non-synonymous SNPs before correcting the bias reported by Simon et al.<sup>30</sup>, stratified by deleterious (D), normal (N), and very deleterious (V) predictions.

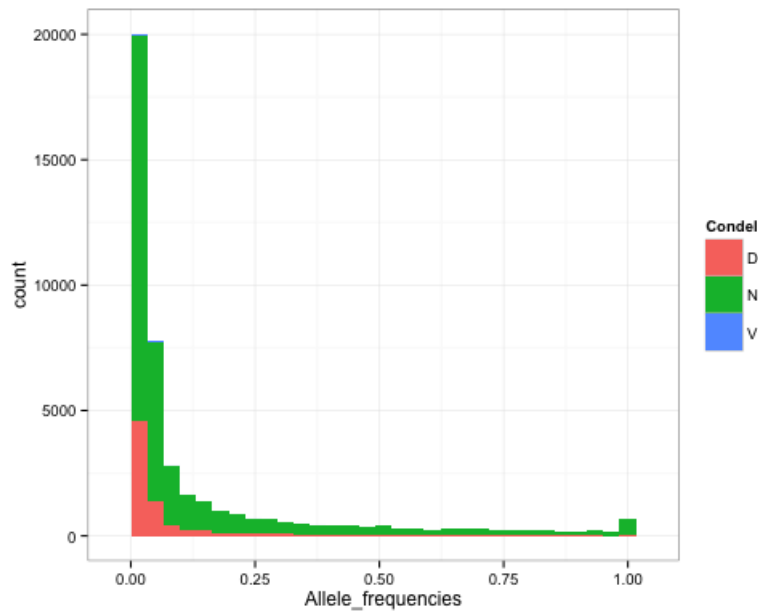

Figure S26. Allele frequency spectrum of autosomal non-synonymous SNPs after correcting the bias reported by Simon et al.<sup>30</sup>, stratified by deleterious (D), normal (N), and very deleterious (V) predictions.

## 11. TABLES

Table S1. Data cleaning summary for the 2.5M and 5M datasets. Filter 1 removes SNPs with zeroed chromosomes and Filter 2 removes repeated SNPs.

| Datasets    | Initial SNPs | Excluded SNPs |          | Final SNPs |
|-------------|--------------|---------------|----------|------------|
|             |              | Filter 1      | Filter 2 |            |
| <b>2.5M</b> | 2,361,093    | 6,926         | 5,570    | 2,348,597  |
| <b>5M</b>   | 4,252,517    | 8,654         | 5,832    | 4,238,031  |

Table S2. Dataset separation and 2.5M-5M consensus.

| Datasets         | Total SNPs | Autosomal        | Mit/X/Y SNPs  | Samples      |
|------------------|------------|------------------|---------------|--------------|
| <b>2.5M</b>      | 2,348,597  | 2,293,235        | 55,362        | 6,504        |
| <b>5M</b>        | 4,238,031  | 4,123,873        | 114,158       | 270          |
| <b>Consensus</b> |            | <b>2,256,647</b> | <b>49,709</b> | <b>6,774</b> |

Table S3. Quality Control summary for consensus autosomal SNPs. Filter 4 is the PLINK geno filter and Filter 5 is the inconsistent-SNPs-to-be-removed list.

| Datasets        | Initial SNPs | Excluded SNPs |          | Cohort Merge | Final SNPs |
|-----------------|--------------|---------------|----------|--------------|------------|
|                 |              | Filter 4      | Filter 5 |              |            |
| <b>BambuÍ</b>   | 2,256,647    | 1,469         | 21,513   |              | 2,233,665  |
| <b>Pelotas</b>  | 2,256,647    | 135           | 21,527   |              | 2,234,985  |
| <b>Salvador</b> | 2,256,647    | 365           | 21,507   |              | 2,234,775  |
| <b>Total</b>    | 2,256,647    | 1,969         | 21,527   | 2,256,636    | 2,235,109  |

Table S4. Quality Control summary for the consensus autosomal dataset samples. Filter 1 is the PLINK mind filter, Filter 2 is sample duplicates, and Filter 3 is the sex check filter.

| Datasets        | Initial samples | Excluded Samples |          |          | Final samples |
|-----------------|-----------------|------------------|----------|----------|---------------|
|                 |                 | Filter 1         | Filter 2 | Filter 3 |               |
| <b>BambuÍ</b>   | 1,502           | 46               | 14       | 0        | 1,442         |
| <b>Pelotas</b>  | 3,858           | 81               | 40       | 1        | 3,736         |
| <b>Salvador</b> | 1,414           | 87               | 14       | 4        | 1,309         |
| <b>TOTAL</b>    | 6,774           | 214              | 68       | 5        | <b>6,487</b>  |

Table S5. Quality Control summary for consensus Mitochondrial, X- and Y- chromosome samples. Individuals were excluded based on the --mind filter of the PLINK software.

| Datasets        | X-chromosomal Samples |          |       | Y-chromosomal Samples |          |       | Mitochondrial Samples |          |       |
|-----------------|-----------------------|----------|-------|-----------------------|----------|-------|-----------------------|----------|-------|
|                 | Initial               | Excluded | Final | Initial               | Excluded | Final | Initial               | Excluded | Final |
| <b>BambuÍ</b>   | 1,442                 | 1        | 1,441 | 564                   | 2        | 562   | 1,442                 | 0        | 1,442 |
| <b>Pelotas</b>  | 3,735                 | 0        | 3,735 | 1,880                 | 7        | 1,873 | 3,736                 | 1        | 3,735 |
| <b>Salvador</b> | 1,309                 | 0        | 1,309 | 707                   | 0        | 707   | 1,309                 | 1        | 1,308 |

Table S6. Quality Control summary for consensus Mitochondrial, X- and Y- chromosome SNPs. SNPs were excluded based on the --geno filter of the PLINK software.

| Datasets        | X-chromosomal SNPs |          |               | Y-chromosomal SNPs |          |              | Mitochondrial SNPs |          |            |
|-----------------|--------------------|----------|---------------|--------------------|----------|--------------|--------------------|----------|------------|
|                 | Initial            | Excluded | Final         | Initial            | Excluded | Final        | Initial            | Excluded | Final      |
| <b>BambuÍ</b>   | 46,945             | 45       | <b>46,900</b> | 2,153              | 38       | <b>2,115</b> | 220                | 7        | <b>213</b> |
| <b>Pelotas</b>  | 46,945             | 43       | <b>46,902</b> | 2,153              | 9        | <b>2,144</b> | 220                | 2        | <b>218</b> |
| <b>Salvador</b> | 46,945             | 39       | <b>46,906</b> | 2,153              | 17       | <b>2,136</b> | 220                | 4        | <b>216</b> |

Table S7. Data summary for the HapMap (phase II+III) frozen datasets.

| HapMap Populations* | N of individuals | N of Autosomal SNPS | N of ChrX SNPS | N of ChrY SNPS | N of mtDNA SNPS |
|---------------------|------------------|---------------------|----------------|----------------|-----------------|
| <b>ASW</b>          | 83               | 1,506,278           | 54,720         | 384            | 71              |
| <b>CEU</b>          | 174              | 3,907,239           | 122,601        | 722            | 212             |
| <b>CHB</b>          | 86               | 3,928,480           | 122,933        | 716            | 207             |
| <b>CHD</b>          | 85               | 1,265,389           | 40,409         | 354            | 44              |
| <b>GIH</b>          | 88               | 1,362,120           | 45,322         | 376            | 59              |
| <b>JPT</b>          | 89               | 3,928,521           | 122,979        | 716            | 207             |
| <b>LWK</b>          | 90               | 1,475,622           | 53,704         | 367            | 71              |
| <b>MEX</b>          | 77               | 1,363,399           | 46,475         | 357            | 34              |
| <b>MKK</b>          | 171              | 1,483,727           | 53,486         | 348            | 77              |
| <b>TSI</b>          | 88               | 1,374,150           | 45,376         | 335            | 60              |
| <b>YRI</b>          | 176              | 3,860,794           | 122,642        | 710            | 210             |

\*ASW, African ancestry in Southwest USA; CEU, Utah residents with Northern and Western European ancestry from the CEPH collection; CHB, Han Chinese in Beijing, China; CHD, Chinese in Metropolitan Denver, Colorado; GIH, Gujarati Indians in Houston, Texas; JPT, Japanese in Tokyo, Japan; LWK, Luhya in Webuye, Kenya; MEX, Mexican ancestry in Los Angeles, California; MKK, Maasai in Kinyawa, Kenya; TSI, Tuscans in Italy; YRI, Yoruba in Ibadan, Nigeria.

Table S8. Summary of HGDP frozen datasets, divided by population (644,246 autosomal SNPs, 16,471 X-chromosome SNPs, 25 Y-chromosome SNPs and 163 mitochondrial-SNPs).

| HGDP Populations | Geographic Origin            | N of individuals |
|------------------|------------------------------|------------------|
| Adygei           | Russia Caucasus              | 17               |
| Balochi          | Pakistan                     | 25               |
| Bantu            | Kenya/South Africa           | 20               |
| Bedouin          | Israel (Negev)               | 48               |
| Biaka_Pygmyes    | Central African Republic     | 32               |
| Brahui           | Pakistan                     | 25               |
| Burusho          | Pakistan                     | 25               |
| Cambodians       | Cambodia                     | 11               |
| Colombians       | Colombia                     | 15               |
| Daí              | China                        | 10               |
| Daur             | China                        | 9                |
| Druze            | Israel (Carmel)              | 47               |
| French_Basque    | France                       | 24               |
| French           | France                       | 29               |
| Han              | China                        | 44               |
| Hazara           | Pakistan                     | 24               |
| Hezhen           | China                        | 9                |
| Japanese         | Japan                        | 29               |
| Kalash           | Pakistan                     | 25               |
| Karitiana        | Brazil                       | 22               |
| Lahu             | China                        | 10               |
| Makrani          | Pakistan                     | 25               |
| Mandenka         | Senegal                      | 27               |
| Maya             | Mexico                       | 25               |
| Mbuti_Pygmeu     | Democratic Republic of Congo | 15               |
| Miaozu           | China                        | 10               |
| Mongola          | China                        | 10               |
| Mozabite         | Algeria (Mzab)               | 30               |
| NAN_Melanesian   | Bougainville                 | 19               |
| Naxi             | China                        | 9                |
| North_Italian    | Italy (Bergamo)              | 13               |
| Orcadian         | Orkney Island                | 16               |
| Oroqen           | China                        | 10               |
| Palestinian      | Israel (Central)             | 51               |
| Papuan           | New Guinea                   | 17               |
| Pathan           | Pakistan                     | 23               |
| Pima             | Mexico                       | 25               |
| Russian          | Russia                       | 25               |
| San              | Namibia                      | 6                |
| Sardinian        | Italy                        | 28               |
| She              | China                        | 10               |
| Sindhi           | Pakistan                     | 25               |
| Surui            | Brazil                       | 21               |
| Tujia            | China                        | 10               |
| Tuscan           | Italy                        | 8                |
| Tu               | China                        | 10               |
| Uygur_China      | China                        | 10               |
| Xibo             | China                        | 9                |
| Yakut            | Siberia                      | 25               |
| Yizu             | China                        | 10               |
| Yoruba           | Nigeria                      | 21               |

Table S9. Summary of individuals and populations for 2,132,104 autosomal SNPs in the 1000 Genomes Project phase I frozen datasets.

| <b>1000 Genomes Populations*</b> | <b>N of individuals</b> |
|----------------------------------|-------------------------|
| <b>ASW</b>                       | 61                      |
| <b>CEU</b>                       | 85                      |
| <b>CHB</b>                       | 97                      |
| <b>CHS</b>                       | 100                     |
| <b>CLM</b>                       | 60                      |
| <b>FIN</b>                       | 93                      |
| <b>GBR</b>                       | 89                      |
| <b>IBS</b>                       | 14                      |
| <b>JPT</b>                       | 89                      |
| <b>LWK</b>                       | 97                      |
| <b>MXL</b>                       | 66                      |
| <b>PUR</b>                       | 55                      |
| <b>TSI</b>                       | 98                      |
| <b>YRI</b>                       | 88                      |

\*ASW, Americans of African Ancestry in SW USA ; CEU, Utah Residents (CEPH) with Northern and Western European ancestry; CHB, Han Chinese in Beijing, China; CHS, Southern Han Chinese ; CLM, Colombians from Medellin, Colombia ; FIN, Finnish in Finland ; GBR, British in England and Scotland ; IBS, Iberian population in Spain ; JPT, Japanese in Tokyo, Japan ; LWK, Luhya in Webuye, Kenya; MXL, Mexican Ancestry from Los Angeles USA ; PUR, Puerto Ricans from Puerto Rico ; TSI, Toscani in Italia ; YRI, Yoruba in Ibadan, Nigeira.

Table S10. Number of SNPs per chromosome and populations present in the phased 1000 Genomes phase I frozen datasets.

| <b>Chr</b>   | <b>Number of SNPs*</b> |
|--------------|------------------------|
| <b>Chr1</b>  | 2,980,130              |
| <b>Chr2</b>  | 3,277,861              |
| <b>Chr3</b>  | 2,739,531              |
| <b>Chr4</b>  | 2,712,965              |
| <b>Chr5</b>  | 2,509,110              |
| <b>Chr6</b>  | 2,404,770              |
| <b>Chr7</b>  | 2,196,168              |
| <b>Chr8</b>  | 2,164,645              |
| <b>Chr9</b>  | 1,638,291              |
| <b>Chr10</b> | 1,866,772              |
| <b>Chr11</b> | 1,877,176              |
| <b>Chr12</b> | 1,811,857              |
| <b>Chr13</b> | 1,361,289              |
| <b>Chr14</b> | 1,245,407              |
| <b>Chr15</b> | 1,120,852              |
| <b>Chr16</b> | 1,199,899              |
| <b>Chr17</b> | 1,035,965              |
| <b>Chr18</b> | 1,079,340              |
| <b>Chr19</b> | 807,096                |
| <b>Chr20</b> | 847,692                |
| <b>Chr21</b> | 512,682                |
| <b>Chr22</b> | 489,301                |

\* ASW (N=61), CEU (N=85), CHB (N=97), CHS (N=100), CLM (N=60), FIN (N=93), GBR (N=89), IBS (N=14), JPT (N=89), LWK (N=97), MXL (N=66), PUR (N=55), TSI (N=98), YRI (N=88)

Table S11. Number of samples per population of the Original Dataset in the integrated autosomal dataset (Original Dataset in the Main Text).

| <b>Populations</b>   | <b>N</b>     | <b>Dataset</b> |
|----------------------|--------------|----------------|
| <b>Adygei</b>        | 17           | HGDP           |
| <b>Ashanincas</b>    | 44           | LDGH           |
| <b>ASW</b>           | 97           | HapMap/1000G   |
| Bambuí               | <b>1,442</b> | <b>EPIGEN</b>  |
| <b>Bantu</b>         | 20           | HGDP           |
| <b>Bedouin</b>       | 48           | HGDP           |
| <b>CEU</b>           | 173          | HapMap/1000G   |
| <b>CLM</b>           | 60           | 1000G          |
| <b>Colombians</b>    | 15           | HGDP           |
| <b>Druze</b>         | 47           | HGDP           |
| <b>FIN</b>           | 93           | 1000G          |
| <b>French</b>        | 29           | HGDP           |
| <b>French_Basque</b> | 24           | HGDP           |
| <b>GBR</b>           | 89           | 1000G          |
| <b>IBS</b>           | 14           | 1000G          |
| <b>Japanese</b>      | 29           | HGDP           |
| <b>JPT</b>           | 100          | HapMap/1000G   |
| <b>Karitiana</b>     | 22           | HGDP           |
| <b>LWK</b>           | 100          | HapMap/1000G   |
| <b>Mandenka</b>      | 27           | HGDP           |
| <b>Maya</b>          | 25           | HGDP           |
| <b>MEX/MXL</b>       | 97           | HapMap/1000G   |
| <b>Mozabite</b>      | 30           | HGDP           |
| <b>North_Italian</b> | 13           | HGDP           |
| <b>Orcadian</b>      | 16           | HGDP           |
| <b>Palestinian</b>   | 51           | HGDP           |
| Pelotas              | <b>3,736</b> | <b>EPIGEN</b>  |
| <b>Pima</b>          | 25           | HGDP           |
| <b>PUR</b>           | 55           | 1000G          |
| <b>Russian</b>       | 25           | HGDP           |
| Salvador             | <b>1,309</b> | <b>EPIGEN</b>  |
| <b>Sardinian</b>     | 28           | HGDP           |
| <b>Shimaa</b>        | 45           | LDGH           |
| <b>Surui</b>         | 21           | HGDP           |
| <b>TSI</b>           | 98           | HapMap/1000G   |
| <b>Tuscan</b>        | 8            | HGDP           |
| <b>Yoruba</b>        | 21           | HGDP           |
| <b>YRI</b>           | 174          | HapMap/1000G   |
| <b>TOTAL</b>         | <b>8,267</b> | -              |

Table S12. Number of SNPs per chromosome in the integrated original autosomal dataset.

| <b>Chromosome</b> | <b>N SNPs</b> | <b>Chromosome</b> | <b>N SNPs</b> |
|-------------------|---------------|-------------------|---------------|
| Chr1              | 25,504        | Chr12             | 16,246        |
| Chr2              | 27,078        | Chr13             | 12,418        |
| Chr3              | 22,858        | Chr14             | 11,235        |
| Chr4              | 19,766        | Chr15             | 10,646        |
| Chr5              | 21,049        | Chr16             | 10,583        |
| Chr6              | 21,189        | Chr17             | 9,139         |
| Chr7              | 18,118        | Chr18             | 10,495        |
| Chr8              | 19,194        | Chr19             | 5,998         |
| Chr9              | 16,546        | Chr20             | 9,110         |
| Chr10             | 17,917        | Chr21             | 5,175         |
| Chr11             | 16,469        | Chr22             | 5,057         |
| <b>TOTAL</b>      |               | <b>331,790</b>    |               |

Table S13. Number of relatedness samples excluded from each EPIGEN cohort and non-related remaining samples. (Dataset U).

| <b>Cohort</b>   | <b>N excluded samples</b> | <b>N non-related samples</b> |
|-----------------|---------------------------|------------------------------|
| <b>Salvador</b> | 63                        | 1,246                        |
| <b>BambuÍ</b>   | 516                       | 926                          |
| <b>Pelotas</b>  | 83                        | 3,653                        |
| <b>Total</b>    | 662                       | 5,825                        |

Table S14. Number of females per population of the Original Dataset in the integrated X-chromosome dataset.

| <b>Populations</b>   | <b>N</b>     | <b>Data Base</b> |
|----------------------|--------------|------------------|
| <b>Adygei</b>        | 10           | HGDP             |
| <b>ASW</b>           | 53           | HapMap/1000G     |
| BambuÍ               | <b>877</b>   | <b>EPIGEN</b>    |
| <b>Bantu</b>         | 1            | HGDP             |
| <b>Bedouin</b>       | 20           | HGDP             |
| <b>CEU</b>           | 92           | HapMap/1000G     |
| <b>CLM</b>           | 31           | 1000G            |
| <b>Colombians</b>    | 8            | HGDP             |
| <b>Druze</b>         | 33           | HGDP             |
| <b>FIN</b>           | 58           | 1000G            |
| <b>French</b>        | 17           | HGDP             |
| <b>French_Basque</b> | 8            | HGDP             |
| <b>GBR</b>           | 48           | 1000G            |
| <b>IBS</b>           | 7            | 1000G            |
| <b>Japanese</b>      | 7            | HGDP             |
| <b>JPT</b>           | 46           | HapMap/1000G     |
| <b>Karitiana</b>     | 14           | HGDP             |
| <b>LWK</b>           | 50           | HapMap/1000G     |
| <b>Mandenka</b>      | 8            | HGDP             |
| <b>Maya</b>          | 23           | HGDP             |
| <b>MEX/MXL</b>       | 54           | HapMap/1000G     |
| <b>Mozabite</b>      | 10           | HGDP             |
| <b>North_Italian</b> | 5            | HGDP             |
| <b>Orcadian</b>      | 9            | HGDP             |
| <b>Palestinian</b>   | 34           | HGDP             |
| Pelotas              | <b>1,855</b> | <b>EPIGEN</b>    |
| <b>Pima</b>          | 11           | HGDP             |
| <b>PUR</b>           | 27           | 1000G            |
| <b>Russian</b>       | 9            | HGDP             |
| Salvador             | <b>602</b>   | <b>EPIGEN</b>    |
| <b>Sardinian</b>     | 12           | HGDP             |
| <b>Surui</b>         | 10           | HGDP             |
| <b>TSI</b>           | 48           | HapMap/1000G     |
| <b>Tuscan</b>        | 2            | HGDP             |
| <b>Yoruba</b>        | 12           | HGDP             |
| <b>YRI</b>           | 81           | HapMap/1000G     |
| <b>TOTAL</b>         | 4,192        | -                |



Table S15. Number of SNPs per chromosome shared between populations used in local ancestry analyses.

| Chromosome | N of common SNPs |
|------------|------------------|
| 1          | 160,082          |
| 2          | 170,715          |
| 3          | 144,131          |
| 4          | 134,702          |
| 5          | 128,184          |
| 6          | 125,346          |
| 7          | 113,418          |
| 8          | 111,173          |
| 9          | 91,189           |
| 10         | 104,935          |
| 11         | 101,906          |
| 12         | 98,591           |
| 13         | 73,697           |
| 14         | 67,464           |
| 15         | 63,634           |
| 16         | 66,998           |
| 17         | 57,352           |
| 18         | 61,054           |
| 19         | 40,491           |
| 20         | 50,165           |
| 21         | 28,214           |
| 22         | 28,927           |

Table S16. Genetic differentiation ( $F_{ST}$ ) matrix between ADMIXTURE ancestry clusters obtained with K=8.

| K=8                                                                                 |  |  |  |  |  |  |  |  |
|-------------------------------------------------------------------------------------|-------------------------------------------------------------------------------------|-------------------------------------------------------------------------------------|-------------------------------------------------------------------------------------|-------------------------------------------------------------------------------------|--------------------------------------------------------------------------------------|---------------------------------------------------------------------------------------|---------------------------------------------------------------------------------------|---------------------------------------------------------------------------------------|
|  |                                                                                     |                                                                                     |                                                                                     |                                                                                     |                                                                                      |                                                                                       |                                                                                       |                                                                                       |
|  | 0.174                                                                               |                                                                                     |                                                                                     |                                                                                     |                                                                                      |                                                                                       |                                                                                       |                                                                                       |
|  | 0.03                                                                                | 0.158                                                                               |                                                                                     |                                                                                     |                                                                                      |                                                                                       |                                                                                       |                                                                                       |
|  | 0.118                                                                               | 0.129                                                                               | 0.11                                                                                |                                                                                     |                                                                                      |                                                                                       |                                                                                       |                                                                                       |
|  | 0.029                                                                               | 0.167                                                                               | 0.029                                                                               | 0.115                                                                               |                                                                                      |                                                                                       |                                                                                       |                                                                                       |
|  | 0.215                                                                               | 0.141                                                                               | 0.202                                                                               | 0.173                                                                               | 0.21                                                                                 |                                                                                       |                                                                                       |                                                                                       |
|  | 0.141                                                                               | 0.222                                                                               | 0.142                                                                               | 0.161                                                                               | 0.137                                                                                | 0.261                                                                                 |                                                                                       |                                                                                       |
|  | 0.144                                                                               | 0.224                                                                               | 0.146                                                                               | 0.163                                                                               | 0.141                                                                                | 0.263                                                                                 | 0.019                                                                                 |                                                                                       |
|  | 0.031                                                                               | 0.172                                                                               | 0.042                                                                               | 0.114                                                                               | 0.039                                                                                | 0.215                                                                                 | 0.131                                                                                 | 0.135                                                                                 |

Table S17. Mean sub-continental proportions for the Mustard (East-associated, EAFR) and Blue (West Africa – associated, WAFR) ancestry clusters of the 3 EPIGEN populations and the Afro-American population ASW, Colombians (CLM), Mexicans (MEX) and Puerto Ricans (PUR) from HapMap.

| <b>Mean</b>         | <b>BambuÍ</b> | <b>Pelotas</b> | <b>Salvador</b> | <b>ASW</b> | <b>CLM</b> | <b>MEX</b> | <b>PUR</b> |
|---------------------|---------------|----------------|-----------------|------------|------------|------------|------------|
| <b>Blue</b>         | 0.095         | 0.087          | 0.378           | 0.632      | 0.052      | 0.030      | 0.094      |
| <b>Mustard</b>      | 0.053         | 0.068          | 0.126           | 0.130      | 0.030      | 0.019      | 0.029      |
| <b>Ratio</b>        | 1.79          | 1.30           | 3.00            | 4.85       | 1.74       | 1.60       | 3.22       |
| <b>Blue/Mustard</b> |               |                |                 |            |            |            |            |

Table S18. Mean Contributions and sex-bias of Europeans (EUR), Africans (AFR) and Native Americans (NAT) ancestry for X-chromosome and autosomal data.

| <b>Parental Contributions</b> | <b>Salvador females</b> | <b>BambuÍ females</b> | <b>Pelotas females</b> |
|-------------------------------|-------------------------|-----------------------|------------------------|
| EUR Autosomal                 | 0.43                    | 0.78                  | 0.76                   |
| EUR X-chromosome              | 0.29                    | 0.67                  | 0.67                   |
| <b>Mean bias*</b>             | <b>0.15</b>             | <b>0.11</b>           | <b>0.09</b>            |
| AFR Autosomal                 | 0.50                    | 0.15                  | 0.16                   |
| AFR X-chromosome              | 0.60                    | 0.18                  | 0.19                   |
| <b>Mean bias*</b>             | <b>-0.10</b>            | <b>-0.03</b>          | <b>-0.03</b>           |
| NAT Autosomal                 | 0.07                    | 0.07                  | 0.08                   |
| NAT X-chromosome              | 0.11                    | 0.15                  | 0.14                   |
| <b>Mean bias*</b>             | <b>-0.04</b>            | <b>-0.08</b>          | <b>-0.06</b>           |

\* The mean of the differences between autosomal minus X-chromosome ancestry

Table S19. Absolut numbers and frequencies of all mitochondrial haplogroups and sub-haplogroups inferred by HaploGrep.

| <b>Absolut Numbers/Frequencies</b> |                 |               |                |              |
|------------------------------------|-----------------|---------------|----------------|--------------|
| <b>mt-haplogroup</b>               | <b>Salvador</b> | <b>Bambui</b> | <b>Pelotas</b> | <b>Total</b> |
| A                                  | 41 / 0.0313     | 0 / 0         | 154 / 0.0412   | 195 / 0.0301 |
| A2a                                | 0 / 0           | 0 / 0         | 2 / 0.0005     | 2 / 0.0003   |
| A7                                 | 1 / 0.0008      | 0 / 0         | 11 / 0.0029    | 12 / 0.0019  |
| B2                                 | 43 / 0.0329     | 223 / 0.1546  | 287 / 0.0768   | 553 / 0.0853 |
| B2b                                | 22 / 0.0168     | 33 / 0.0229   | 33 / 0.0088    | 88 / 0.0136  |
| B4a                                | 0 / 0           | 0 / 0         | 20 / 0.0054    | 20 / 0.0031  |
| B4b                                | 2 / 0.0015      | 0 / 0         | 0 / 0          | 2 / 0.0003   |
| B5                                 | 0 / 0           | 5 / 0.0035    | 2 / 0.0005     | 7 / 0.0011   |
| C                                  | 43 / 0.0329     | 78 / 0.0541   | 133 / 0.0356   | 254 / 0.0392 |
| C1a                                | 0 / 0           | 0 / 0         | 2 / 0.0005     | 2 / 0.0003   |
| C1b                                | 0 / 0           | 35 / 0.0243   | 0 / 0          | 35 / 0.0054  |
| C1c                                | 6 / 0.0046      | 21 / 0.0146   | 35 / 0.0094    | 62 / 0.0096  |
| C1d                                | 10 / 0.0076     | 27 / 0.0187   | 35 / 0.0094    | 72 / 0.0111  |
| C4b                                | 2 / 0.0015      | 0 / 0         | 3 / 0.0008     | 5 / 0.0008   |
| C7a                                | 0 / 0           | 2 / 0.0014    | 0 / 0          | 2 / 0.0003   |
| D1j                                | 0 / 0           | 0 / 0         | 1 / 0.0003     | 1 / 0.0002   |
| D4                                 | 16 / 0.0122     | 8 / 0.0055    | 79 / 0.0212    | 103 / 0.0159 |
| D4g                                | 0 / 0           | 0 / 0         | 6 / 0.0016     | 6 / 0.0009   |
| H                                  | 0 / 0           | 12 / 0.0083   | 0 / 0          | 12 / 0.0019  |
| H1                                 | 10 / 0.0076     | 42 / 0.0291   | 259 / 0.0693   | 311 / 0.048  |
| H11                                | 0 / 0           | 0 / 0         | 5 / 0.0013     | 5 / 0.0008   |
| H13                                | 1 / 0.0008      | 0 / 0         | 14 / 0.0037    | 15 / 0.0023  |
| H15                                | 0 / 0           | 0 / 0         | 1 / 0.0003     | 1 / 0.0002   |
| H17                                | 0 / 0           | 0 / 0         | 2 / 0.0005     | 2 / 0.0003   |
| H1a                                | 0 / 0           | 14 / 0.0097   | 21 / 0.0056    | 35 / 0.0054  |
| H1b                                | 1 / 0.0008      | 0 / 0         | 15 / 0.004     | 16 / 0.0025  |
| H1c                                | 2 / 0.0015      | 6 / 0.0042    | 92 / 0.0246    | 100 / 0.0154 |
| H1h                                | 4 / 0.0031      | 0 / 0         | 2 / 0.0005     | 6 / 0.0009   |
| H1n                                | 0 / 0           | 0 / 0         | 2 / 0.0005     | 2 / 0.0003   |
| H2a                                | 10 / 0.0076     | 15 / 0.0104   | 145 / 0.0388   | 170 / 0.0262 |
| H2c                                | 0 / 0           | 0 / 0         | 1 / 0.0003     | 1 / 0.0002   |
| H3                                 | 5 / 0.0038      | 8 / 0.0055    | 102 / 0.0273   | 115 / 0.0177 |
| H30                                | 0 / 0           | 0 / 0         | 26 / 0.007     | 26 / 0.004   |
| H3g                                | 0 / 0           | 0 / 0         | 1 / 0.0003     | 1 / 0.0002   |
| H3h                                | 0 / 0           | 0 / 0         | 1 / 0.0003     | 1 / 0.0002   |
| H3u                                | 0 / 0           | 0 / 0         | 3 / 0.0008     | 3 / 0.0005   |
| H3x                                | 0 / 0           | 0 / 0         | 2 / 0.0005     | 2 / 0.0003   |
| H4                                 | 0 / 0           | 0 / 0         | 18 / 0.0048    | 18 / 0.0028  |
| H4a                                | 0 / 0           | 0 / 0         | 44 / 0.0118    | 44 / 0.0068  |
| H5a                                | 0 / 0           | 0 / 0         | 6 / 0.0016     | 6 / 0.0009   |
| H6                                 | 0 / 0           | 0 / 0         | 1 / 0.0003     | 1 / 0.0002   |
| H6a                                | 1 / 0.0008      | 2 / 0.0014    | 11 / 0.0029    | 14 / 0.0022  |

|     |              |             |              |              |
|-----|--------------|-------------|--------------|--------------|
| H7a | 1 / 0.0008   | 0 / 0       | 1 / 0.0003   | 2 / 0.0003   |
| H7d | 0 / 0        | 0 / 0       | 12 / 0.0032  | 12 / 0.0019  |
| H45 | 0 / 0        | 1 / 0.0007  | 0 / 0        | 1 / 0.0002   |
| H60 | 0 / 0        | 2 / 0.0014  | 0 / 0        | 2 / 0.0003   |
| HV  | 1 / 0.0008   | 2 / 0.0014  | 32 / 0.0086  | 35 / 0.0054  |
| HV0 | 4 / 0.0031   | 19 / 0.0132 | 119 / 0.0319 | 142 / 0.0219 |
| HV5 | 0 / 0        | 0 / 0       | 1 / 0.0003   | 1 / 0.0002   |
| I   | 1 / 0.0008   | 0 / 0       | 3 / 0.0008   | 4 / 0.0006   |
| I1a | 0 / 0        | 17 / 0.0118 | 1 / 0.0003   | 18 / 0.0028  |
| I2  | 4 / 0.0031   | 0 / 0       | 14 / 0.0037  | 18 / 0.0028  |
| I5a | 1 / 0.0008   | 7 / 0.0049  | 0 / 0        | 8 / 0.0012   |
| J1  | 4 / 0.0031   | 19 / 0.0132 | 27 / 0.0072  | 50 / 0.0077  |
| J1b | 0 / 0        | 5 / 0.0035  | 9 / 0.0024   | 14 / 0.0022  |
| J1c | 0 / 0        | 14 / 0.0097 | 60 / 0.0161  | 74 / 0.0114  |
| J2  | 4 / 0.0031   | 3 / 0.0021  | 23 / 0.0062  | 30 / 0.0046  |
| J2a | 1 / 0.0008   | 8 / 0.0055  | 22 / 0.0059  | 31 / 0.0048  |
| K   | 0 / 0        | 1 / 0.0007  | 0 / 0        | 1 / 0.0002   |
| K1  | 1 / 0.0008   | 19 / 0.0132 | 39 / 0.0104  | 59 / 0.0091  |
| K1a | 3 / 0.0023   | 0 / 0       | 55 / 0.0147  | 58 / 0.0089  |
| K1b | 0 / 0        | 0 / 0       | 5 / 0.0013   | 5 / 0.0008   |
| K1c | 0 / 0        | 0 / 0       | 18 / 0.0048  | 18 / 0.0028  |
| K2b | 0 / 0        | 0 / 0       | 2 / 0.0005   | 2 / 0.0003   |
| L0a | 88 / 0.0673  | 67 / 0.0465 | 85 / 0.0228  | 240 / 0.037  |
| L0b | 0 / 0        | 0 / 0       | 1 / 0.0003   | 1 / 0.0002   |
| L0d | 3 / 0.0023   | 0 / 0       | 33 / 0.0088  | 36 / 0.0056  |
| L1  | 1 / 0.0008   | 0 / 0       | 0 / 0        | 1 / 0.0002   |
| L1b | 91 / 0.0696  | 56 / 0.0388 | 57 / 0.0153  | 204 / 0.0315 |
| L1c | 128 / 0.0979 | 101 / 0.07  | 147 / 0.0394 | 376 / 0.058  |
| L2a | 232 / 0.1774 | 50 / 0.0347 | 191 / 0.0511 | 473 / 0.0729 |
| L2b | 6 / 0.0046   | 0 / 0       | 1 / 0.0003   | 7 / 0.0011   |
| L2c | 29 / 0.0222  | 3 / 0.0021  | 17 / 0.0046  | 49 / 0.0076  |
| L2d | 7 / 0.0054   | 0 / 0       | 3 / 0.0008   | 10 / 0.0015  |
| L2e | 1 / 0.0008   | 1 / 0.0007  | 0 / 0        | 2 / 0.0003   |
| L3  | 99 / 0.0757  | 33 / 0.0229 | 147 / 0.0394 | 279 / 0.043  |
| L3b | 62 / 0.0474  | 37 / 0.0257 | 22 / 0.0059  | 121 / 0.0187 |
| L3c | 67 / 0.0512  | 8 / 0.0055  | 29 / 0.0078  | 104 / 0.016  |
| L3d | 64 / 0.0489  | 12 / 0.0083 | 37 / 0.0099  | 113 / 0.0174 |
| L3e | 101 / 0.0772 | 65 / 0.0451 | 124 / 0.0332 | 290 / 0.0447 |
| L3f | 36 / 0.0275  | 21 / 0.0146 | 37 / 0.0099  | 94 / 0.0145  |
| L3h | 6 / 0.0046   | 2 / 0.0014  | 8 / 0.0021   | 16 / 0.0025  |
| L3i | 1 / 0.0008   | 0 / 0       | 1 / 0.0003   | 2 / 0.0003   |
| L3k | 5 / 0.0038   | 0 / 0       | 0 / 0        | 5 / 0.0008   |
| L3x | 0 / 0        | 2 / 0.0014  | 0 / 0        | 2 / 0.0003   |
| L4b | 6 / 0.0046   | 0 / 0       | 9 / 0.0024   | 15 / 0.0023  |
| L5a | 0 / 0        | 0 / 0       | 1 / 0.0003   | 1 / 0.0002   |
| M   | 0 / 0        | 2 / 0.0014  | 3 / 0.0008   | 5 / 0.0008   |
| M1  | 0 / 0        | 2 / 0.0014  | 66 / 0.0177  | 68 / 0.0105  |
| M5a | 0 / 0        | 0 / 0       | 1 / 0.0003   | 1 / 0.0002   |

|              |                 |                 |                 |                 |
|--------------|-----------------|-----------------|-----------------|-----------------|
| N            | 0 / 0           | 188 / 0.1304    | 2 / 0.0005      | 190 / 0.0293    |
| N14          | 0 / 0           | 0 / 0           | 1 / 0.0003      | 1 / 0.0002      |
| N15          | 3 / 0.0023      | 8 / 0.0055      | 9 / 0.0024      | 20 / 0.0031     |
| N1a          | 0 / 0           | 0 / 0           | 35 / 0.0094     | 35 / 0.0054     |
| N1b          | 2 / 0.0015      | 2 / 0.0014      | 2 / 0.0005      | 6 / 0.0009      |
| N2           | 1 / 0.0008      | 1 / 0.0007      | 106 / 0.0284    | 108 / 0.0167    |
| P7           | 0 / 0           | 0 / 0           | 1 / 0.0003      | 1 / 0.0002      |
| T            | 0 / 0           | 0 / 0           | 1 / 0.0003      | 1 / 0.0002      |
| T1           | 0 / 0           | 7 / 0.0049      | 27 / 0.0072     | 34 / 0.0052     |
| T1a          | 0 / 0           | 0 / 0           | 2 / 0.0005      | 2 / 0.0003      |
| T2           | 2 / 0.0015      | 13 / 0.009      | 146 / 0.0391    | 161 / 0.0248    |
| T2b          | 1 / 0.0008      | 0 / 0           | 25 / 0.0067     | 26 / 0.004      |
| T2f          | 0 / 0           | 0 / 0           | 2 / 0.0005      | 2 / 0.0003      |
| U            | 4 / 0.0031      | 0 / 0           | 1 / 0.0003      | 5 / 0.0008      |
| U2           | 0 / 0           | 0 / 0           | 2 / 0.0005      | 2 / 0.0003      |
| U2d          | 0 / 0           | 0 / 0           | 1 / 0.0003      | 1 / 0.0002      |
| U2e          | 2 / 0.0015      | 3 / 0.0021      | 10 / 0.0027     | 15 / 0.0023     |
| U3a          | 0 / 0           | 8 / 0.0055      | 6 / 0.0016      | 14 / 0.0022     |
| U4           | 2 / 0.0015      | 21 / 0.0146     | 25 / 0.0067     | 48 / 0.0074     |
| U4b          | 0 / 0           | 39 / 0.027      | 2 / 0.0005      | 41 / 0.0063     |
| U5           | 0 / 0           | 0 / 0           | 29 / 0.0078     | 29 / 0.0045     |
| U5a          | 3 / 0.0023      | 13 / 0.009      | 38 / 0.0102     | 54 / 0.0083     |
| U5b          | 1 / 0.0008      | 6 / 0.0042      | 120 / 0.0321    | 127 / 0.0196    |
| U6           | 7 / 0.0054      | 20 / 0.0139     | 54 / 0.0145     | 81 / 0.0125     |
| U6a          | 1 / 0.0008      | 0 / 0           | 10 / 0.0027     | 11 / 0.0017     |
| U6b          | 0 / 0           | 0 / 0           | 3 / 0.0008      | 3 / 0.0005      |
| U7           | 0 / 0           | 0 / 0           | 2 / 0.0005      | 2 / 0.0003      |
| U8a          | 0 / 0           | 0 / 0           | 4 / 0.0011      | 4 / 0.0006      |
| V1           | 1 / 0.0008      | 0 / 0           | 7 / 0.0019      | 8 / 0.0012      |
| V2           | 0 / 0           | 0 / 0           | 6 / 0.0016      | 6 / 0.0009      |
| V7           | 0 / 0           | 0 / 0           | 2 / 0.0005      | 2 / 0.0003      |
| V7a          | 0 / 0           | 0 / 0           | 13 / 0.0035     | 13 / 0.002      |
| W3a          | 0 / 0           | 0 / 0           | 1 / 0.0003      | 1 / 0.0002      |
| Y            | 0 / 0           | 3 / 0.0021      | 0 / 0           | 3 / 0.0005      |
| <b>TOTAL</b> | <b>1308 / 1</b> | <b>1442 / 1</b> | <b>3735 / 1</b> | <b>6485 / 1</b> |

Table S20. Population genetics indices based on the haplogroup and subhaplogroup distribution in the three Brazilian EPIGEN cohorts.

| <b>Mitochondrial DNA</b>                            | <b>Salvador</b>  | <b>BambuÍ</b> | <b>Pelotas</b>   |
|-----------------------------------------------------|------------------|---------------|------------------|
| <b>n. individuals</b>                               | 1,308            | 1,442         | 3,735            |
| <b>n. inferred different haplogrups<sup>1</sup></b> | 62               | 59            | 111              |
| <b>Gene diversity (SD)<sup>1</sup></b>              | 0.926<br>(0.003) | 0.938 (0.003) | 0.969<br>(0.001) |
| <b>Admixture estimates</b>                          |                  |               |                  |
| <b>African</b>                                      | 78.9%            | 31.7%         | 25.4%            |
| <b>European</b>                                     | 6.8%             | 38.2%         | 53.1%            |
| <b>Native American</b>                              | 14.2%            | 29.9%         | 21.5%            |

  

| <b>Y-chromosome</b>                                 | <b>Salvador</b> | <b>BambuÍ</b> | <b>Pelotas</b> |
|-----------------------------------------------------|-----------------|---------------|----------------|
| <b>n. individuals</b>                               | 707             | 562           | 1,873          |
| <b>n. inferred different haplogrups<sup>2</sup></b> | 51              | 43            | 60             |
| <b>Gene diversity (SD)<sup>2</sup></b>              | 0.881(0.009)    | 0.814(0.016)  | 0.868(0.007)   |
| <b>Admixture estimates</b>                          |                 |               |                |
| <b>African</b>                                      | 28%             | 12.5%         | 11%            |
| <b>European</b>                                     | 70%             | 87.0%         | 87.6%          |
| <b>Native American</b>                              | 1.8%            | 0.5%          | 1.4%           |

<sup>1</sup> Based on Table S19.

<sup>2</sup> Expected haplogroups/sub-haplogroups heterozygosity based on frequencies of Table S23. SD: standard deviation.

TableS21. Absolut numbers and frequencies of continental biogeographic assignments of mt-haplogroups.

| Ancestry        | Absolut Numbers/ Frequencies |            |            |             |             |
|-----------------|------------------------------|------------|------------|-------------|-------------|
|                 | mt-haplogroup                | Salvador   | Bambui     | Pelotas     | Total       |
| Native American | A                            | 42/0.2258  | 0/0.0000   | 167/0.2080  | 209         |
|                 | B                            | 67/0.3602  | 261/0.6042 | 342/0.4259  | 670         |
|                 | C                            | 61/0.3280  | 163/0.3773 | 208/0.2590  | 432         |
|                 | D                            | 16/0.0860  | 8/0.0185   | 86/0.1071   | 110         |
|                 | <b>Total</b>                 | <b>186</b> | <b>432</b> | <b>803</b>  | <b>1421</b> |
| European        | H                            | 35/0.4217  | 102/0.2948 | 787/0.4484  | 924         |
|                 | HV                           | 5/0.0602   | 21/0.0607  | 152/0.0866  | 178         |
|                 | I                            | 6/0.0723   | 24/0.0694  | 18/0.0103   | 48          |
|                 | J                            | 9/0.1084   | 49/0.1416  | 141/0.0803  | 199         |
|                 | K                            | 4/0.0482   | 20/0.0578  | 119/0.0678  | 143         |
|                 | T                            | 3/0.0361   | 20/0.0578  | 203/0.1157  | 226         |
|                 | U                            | 20/0.2410  | 110/0.3179 | 307/0.1749  | 437         |
|                 | V                            | 1/0.0120   | 0/0.0000   | 28/0.0160   | 29          |
|                 | <b>Total</b>                 | <b>83</b>  | <b>346</b> | <b>1755</b> | <b>2184</b> |
| Asian           | M                            | 0/0.0000   | 4/0.0194   | 70/0.3084   | 74          |
|                 | N                            | 6/1.0000   | 199/0.9660 | 155/0.6828  | 360         |
|                 | P                            | 0/0.0000   | 0/0.0000   | 1/0.0044    | 1           |
|                 | Y                            | 0/0.0000   | 3/0.0146   | 0/0.0000    | 3           |
|                 | W                            | 0/0.0000   | 0/0.0000   | 1/0.0044    | 1           |
|                 | <b>Total</b>                 | <b>6</b>   | <b>206</b> | <b>227</b>  | <b>439</b>  |
| African         | L0a                          | 88/0.0852  | 67/0.1463  | 85/0.0895   | 240         |
|                 | L0b                          | 0/0.0000   | 0/0.0000   | 1/0.0011    | 1           |
|                 | L0d                          | 3/0.0029   | 0/0.0000   | 33/0.0347   | 36          |
|                 | L1                           | 1/0.0010   | 0/0.0000   | 0/0.0000    | 1           |
|                 | L1b                          | 91/0.0881  | 56/0.1223  | 57/0.0600   | 204         |
|                 | L1c                          | 128/0.1239 | 101/0.2205 | 147/0.1547  | 376         |
|                 | L2a                          | 232/0.2246 | 50/0.1092  | 191/0.2011  | 473         |
|                 | L2b                          | 6/0.0058   | 0/0.0000   | 1/0.0011    | 7           |
|                 | L2c                          | 29/0.0281  | 3/0.0066   | 17/0.0179   | 49          |
|                 | L2d                          | 7/0.0068   | 0/0.0000   | 3/0.0032    | 10          |
|                 | L2e                          | 1/0.0010   | 1/0.0022   | 0/0.0000    | 2           |
|                 | L3                           | 99/0.0958  | 33/0.0721  | 147/0.1547  | 279         |
|                 | L3b                          | 62/0.0600  | 37/0.0808  | 22/0.0232   | 121         |
|                 | L3c                          | 67/0.0649  | 8/0.0175   | 29/0.0305   | 104         |
|                 | L3d                          | 64/0.0620  | 12/0.0262  | 37/0.0389   | 113         |
|                 | L3e                          | 101/0.0978 | 65/0.1419  | 124/0.1305  | 290         |
|                 | L3f                          | 36/0.0348  | 21/0.0459  | 37/0.0389   | 94          |
|                 | L3h                          | 6/0.0058   | 2/0.0044   | 8/0.0084    | 16          |
|                 | L3i                          | 1/0.0010   | 0/0.0000   | 1/0.0011    | 2           |
|                 | L3k                          | 5/0.0048   | 0/0.0000   | 0/0.0000    | 5           |
|                 | L3x                          | 0/0.0000   | 2/0.0044   | 0/0.0000    | 2           |
| L4b             | 6/0.0058                     | 0/0.0000   | 9/0.0095   | 15          |             |
| L5a             | 0/0.0000                     | 0/0.0000   | 1/0.0011   | 1           |             |
| <b>Total</b>    | <b>1033</b>                  | <b>458</b> | <b>950</b> | <b>2441</b> |             |

Table S22. Genetic differentiation ( $F_{ST}$ ) between the three EPIGEN cohorts estimated from mt-DNA (upper matrix) and Y-chromosome haplogroups (lower matrix)<sup>1</sup>.

|          | Salvador            | BambuÍ              | Pelotas             |
|----------|---------------------|---------------------|---------------------|
| Salvador |                     | 0.0344 <sup>2</sup> | 0.0236 <sup>2</sup> |
| BambuÍ   | 0.1394 <sup>2</sup> |                     | 0.0188 <sup>2</sup> |
| Pelotas  | 0.0079 <sup>2</sup> | 0.1339 <sup>2</sup> |                     |

<sup>1</sup>  $F_{ST}$  are estimated by Arlequin based on haplotype frequencies Tables S19 and S23 assuming the infinite allele model.

<sup>2</sup>  $P < 10^{-5}$  based on a randomization test of individuals among populations (5,000 replicates of the test).

Table S23. Absolut numbers and frequencies of all Y chromosome sub-haplogroups.

| Y-haplogroup                       | Absolut Numbers / Frequencies |                |             |                 |
|------------------------------------|-------------------------------|----------------|-------------|-----------------|
|                                    | Salvador                      | BambuÍ         | Pelotas     | Total           |
| <b>A3b2*</b>                       | 1 / 0.0014                    | 0 / 0          | 0 / 0       | 1 / 0.0003      |
| <b>B2a1a2a2*</b>                   | 3 / 0.0042                    | 1 / 0.0018     | 8 / 0.0043  | 12 / 0.0038     |
| <b>B2b*</b>                        | 0 / 0                         | 0 / 0          | 2 / 0.0011  | 2 / 0.0006      |
| <b>B2b1*</b>                       | 0 / 0                         | 1 / 0.0018     | 2 / 0.0011  | 3 / 0.001       |
| <b>D2*</b>                         | 0 / 0                         | 0 / 0          | 1 / 0.0005  | 1 / 0.0003      |
| <b>DE*</b>                         | 1 / 0.0014                    | 0 / 0          | 0 / 0       | 1 / 0.0003      |
| <b>E1a*</b>                        | 3 / 0.0042                    | 0 / 0          | 7 / 0.0037  | 10 / 0.0032     |
| <b>E1a1</b>                        | 0 / 0                         | 0 / 0          | 2 / 0.0011  | 2 / 0.0006      |
| <b>E1b1a1*</b>                     | 1 / 0.0014                    | 0 / 0          | 1 / 0.0005  | 2 / 0.0006      |
| <b>E1b1a1a1a</b>                   | 0 / 0                         | 0 / 0          | 5 / 0.0027  | 5 / 0.0016      |
| <b>E1b1a1a1f*</b>                  | 17 / 0.024                    | 1 / 0.0018     | 4 / 0.0021  | 22 / 0.007      |
| <b>E1b1a1a1f1a*</b>                | 2 / 0.0028                    | 1 / 0.0018     | 0 / 0       | 3 / 0.001       |
| <b>E1b1a1a1f1a1*</b>               | 72 / 0.1018                   | 8 / 0.0142     | 32 / 0.0171 | 112 /<br>0.0356 |
| <b>E1b1a1a1g1*</b>                 | 45 / 0.0636                   | 11 /<br>0.0196 | 38 / 0.0203 | 94 / 0.0299     |
| <b>E1b1a1a1g1a*</b>                | 24 / 0.0339                   | 4 / 0.0071     | 13 / 0.0069 | 41 / 0.013      |
| <b>E1b1b*</b>                      | 1 / 0.0014                    | 1 / 0.0018     | 6 / 0.0032  | 8 / 0.0025      |
| <b>E1b1b1a*</b>                    | 11 / 0.0156                   | 9 / 0.016      | 12 / 0.0064 | 32 / 0.0102     |
| <b>E1b1b1a2*</b>                   | 12 / 0.017                    | 17 /<br>0.0302 | 47 / 0.0251 | 76 / 0.0242     |
| <b>E1b1b1a3b</b>                   | 0 / 0                         | 0 / 0          | 1 / 0.0005  | 1 / 0.0003      |
| <b>E1b1b1b*</b>                    | 1 / 0.0014                    | 0 / 0          | 4 / 0.0021  | 5 / 0.0016      |
| <b>E1b1b1b1*</b>                   | 0 / 0                         | 0 / 0          | 1 / 0.0005  | 1 / 0.0003      |
| <b>E1b1b1b1b</b>                   | 33 / 0.0467                   | 41 / 0.073     | 82 / 0.0438 | 156 /<br>0.0496 |
| <b>E1b1b1c*</b>                    | 3 / 0.0042                    | 5 / 0.0089     | 8 / 0.0043  | 16 / 0.0051     |
| <b>E1b1b1c1* or<br/>E1b1b1c1a*</b> | 3 / 0.0042                    | 9 / 0.016      | 9 / 0.0048  | 21 / 0.0067     |
| <b>E2b*</b>                        | 0 / 0                         | 1 / 0.0018     | 0 / 0       | 1 / 0.0003      |
| <b>E2b1*</b>                       | 1 / 0.0014                    | 1 / 0.0018     | 5 / 0.0027  | 7 / 0.0022      |
| <b>G1* or G1a*</b>                 | 1 / 0.0014                    | 2 / 0.0036     | 4 / 0.0021  | 7 / 0.0022      |



|                        |             |            |             |             |
|------------------------|-------------|------------|-------------|-------------|
| <b>G2a*</b>            | 5 / 0.0071  | 3 / 0.0053 | 15 / 0.008  | 23 / 0.0073 |
| <b>G2a1c*</b>          | 22 / 0.0311 | 8 / 0.0142 | 49 / 0.0262 | 79 / 0.0251 |
| <b>G2a1c1a</b>         | 5 / 0.0071  | 6 / 0.0107 | 4 / 0.0021  | 15 / 0.0048 |
| <b>G2a1c2a1</b>        | 3 / 0.0042  | 2 / 0.0036 | 3 / 0.0016  | 8 / 0.0025  |
| <b>G2a1c2b1a</b>       | 0 / 0       | 0 / 0      | 2 / 0.0011  | 2 / 0.0006  |
| <b>I1*</b>             | 15 / 0.0212 | 33 /       | 89 / 0.0475 | 137 /       |
|                        |             | 0.0587     |             | 0.0436      |
| <b>I1a1c1</b>          | 4 / 0.0057  | 2 / 0.0036 | 8 / 0.0043  | 14 / 0.0045 |
| <b>I2*</b>             | 3 / 0.0042  | 3 / 0.0053 | 18 / 0.0096 | 24 / 0.0076 |
| <b>I2a1a1*</b>         | 8 / 0.0113  | 8 / 0.0142 | 34 / 0.0182 | 50 / 0.0159 |
| <b>I2a2a*</b>          | 16 / 0.0226 | 17 /       | 56 / 0.0299 | 89 / 0.0283 |
|                        |             | 0.0302     |             |             |
| <b>I2a2b</b>           | 1 / 0.0014  | 0 / 0      | 4 / 0.0021  | 5 / 0.0016  |
| <b>J1*</b>             | 9 / 0.0127  | 8 / 0.0142 | 58 / 0.031  | 75 / 0.0239 |
| <b>J2*</b>             | 21 / 0.0297 | 11 /       | 78 / 0.0416 | 110 / 0.035 |
|                        |             | 0.0196     |             |             |
| <b>J2a1b2*</b>         | 8 / 0.0113  | 13 /       | 26 / 0.0139 | 47 / 0.015  |
|                        |             | 0.0231     |             |             |
| <b>J2a1b2a1*</b>       | 5 / 0.0071  | 6 / 0.0107 | 9 / 0.0048  | 20 / 0.0064 |
| <b>J2b*</b>            | 11 / 0.0156 | 4 / 0.0071 | 35 / 0.0187 | 50 / 0.0159 |
| <b>J2b1</b>            | 2 / 0.0028  | 0 / 0      | 1 / 0.0005  | 3 / 0.001   |
| <b>L1* or L1b*</b>     | 0 / 0       | 0 / 0      | 3 / 0.0016  | 3 / 0.001   |
| <b>L1b1</b>            | 2 / 0.0028  | 4 / 0.0071 | 2 / 0.0011  | 8 / 0.0025  |
| <b>N1b1a*</b>          | 2 / 0.0028  | 1 / 0.0018 | 3 / 0.0016  | 6 / 0.0019  |
| <b>O1b1a1*</b>         | 0 / 0       | 0 / 0      | 1 / 0.0005  | 1 / 0.0003  |
| <b>Q1a2*</b>           | 0 / 0       | 0 / 0      | 1 / 0.0005  | 1 / 0.0003  |
| <b>Q1a2a1*</b>         | 12 / 0.017  | 3 / 0.0053 | 24 / 0.0128 | 39 / 0.0124 |
| <b>Q1a4</b>            | 1 / 0.0014  | 0 / 0      | 0 / 0       | 1 / 0.0003  |
| <b>Q1b1*</b>           | 0 / 0       | 0 / 0      | 1 / 0.0005  | 1 / 0.0003  |
| <b>R1a1a*</b>          | 0 / 0       | 0 / 0      | 3 / 0.0016  | 3 / 0.001   |
| <b>R1a1a1a*</b>        | 7 / 0.0099  | 6 / 0.0107 | 66 / 0.0352 | 79 / 0.0251 |
| <b>R1b*</b>            | 8 / 0.0113  | 0 / 0      | 0 / 0       | 8 / 0.0025  |
| <b>R1b1a2a*</b>        | 14 / 0.0198 | 0 / 0      | 0 / 0       | 14 / 0.0045 |
| <b>R1b1a2a1*</b>       | 217 /       | 0 / 0      | 632 /       | 849 /       |
|                        | 0.3069      |            | 0.3374      | 0.2702      |
| <b>R1b1a2a1a*</b>      | 14 / 0.0198 | 16 /       | 37 / 0.0198 | 67 / 0.0213 |
|                        |             | 0.0285     |             |             |
| <b>R1b1a2a1a2b1</b>    | 0 / 0       | 0 / 0      | 1 / 0.0005  | 1 / 0.0003  |
| <b>R1b1a2a1a2b2*</b>   | 7 / 0.0099  | 7 / 0.0125 | 29 / 0.0155 | 43 / 0.0137 |
| <b>R1b1a2a1a2b2a1*</b> | 0 / 0       | 0 / 0      | 2 / 0.0011  | 2 / 0.0006  |
| <b>R1b1a2a1b1a1a1*</b> | 5 / 0.0071  | 8 / 0.0142 | 36 / 0.0192 | 49 / 0.0156 |
| <b>R1b1a2a1b2c*</b>    | 10 / 0.0141 | 14 /       | 45 / 0.024  | 69 / 0.022  |
|                        |             | 0.0249     |             |             |
| <b>R1b1a2a1b2c1a*</b>  | 0 / 0       | 1 / 0.0018 | 8 / 0.0043  | 9 / 0.0029  |
| <b>R1b1a2a1b3*</b>     | 25 / 0.0354 | 31 /       | 112 /       | 168 /       |
|                        |             | 0.0552     | 0.0598      | 0.0535      |
| <b>R2a*</b>            | 1 / 0.0014  | 0 / 0      | 0 / 0       | 1 / 0.0003  |
| <b>Root</b>            | 0 / 0       | 231 /      | 47 / 0.0251 | 278 /       |
|                        |             | 0.411      |             | 0.0885      |

|              |                |                |                 |                 |
|--------------|----------------|----------------|-----------------|-----------------|
| <b>T*</b>    | 0 / 0          | 1 / 0.0018     | 0 / 0           | 1 / 0.0003      |
| <b>T1*</b>   | 8 / 0.0113     | 2 / 0.0036     | 37 / 0.0198     | 47 / 0.015      |
| <b>T1b*</b>  | 1 / 0.0014     | 0 / 0          | 0 / 0           | 1 / 0.0003      |
| <b>TOTAL</b> | <b>707 / 1</b> | <b>562 / 1</b> | <b>1873 / 1</b> | <b>3142 / 1</b> |

Table S24. Continental biogeographic assignment distribution of Y chromosome haplogroups.

| <b>Ancestry</b> | <b>Absolut Numbers/Frequencies</b> |                 |               |                |              |
|-----------------|------------------------------------|-----------------|---------------|----------------|--------------|
|                 | <b>Y-haplogroup</b>                | <b>Salvador</b> | <b>Bambui</b> | <b>Pelotas</b> | <b>Total</b> |
| Native American | Q                                  | 13/1.0000       | 3/1.0000      | 26/1.0000      | 42           |
|                 | <b>Total</b>                       | <b>13</b>       | <b>3</b>      | <b>26</b>      | <b>42</b>    |
| European        | G                                  | 36/0.0783       | 21/0.0469     | 77/0.0495      | 134          |
|                 | I                                  | 47/0.1022       | 63/0.1406     | 209/0.1343     | 319          |
|                 | J                                  | 56/0.1217       | 42/0.0938     | 207/0.1330     | 305          |
|                 | L                                  | 2/0.0043        | 4/0.0089      | 5/0.0032       | 11           |
|                 | N                                  | 2/0.0043        | 1/0.0022      | 3/0.0019       | 6            |
|                 | R                                  | 308/0.6696      | 83/0.1853     | 971/0.6240     | 1362         |
|                 | T                                  | 9/0.0196        | 3/0.0067      | 37/0.0238      | 49           |
|                 | Root                               | 0/0.0000        | 231/0.5156    | 47/0.0302      | 278          |
|                 | <b>Total</b>                       | <b>460</b>      | <b>448</b>    | <b>1556</b>    | <b>2464</b>  |
| Asian           | D                                  | 1/1.0000        | 0/0.0000      | 1/0.5000       | 2            |
|                 | O                                  | 0/0.0000        | 0/0.0000      | 1/0.5000       | 1            |
|                 | <b>Total</b>                       | <b>1</b>        | <b>0</b>      | <b>2</b>       | <b>3</b>     |
| African         | A                                  | 1/0.0043        | 0/0.0000      | 0/0.0000       | 1            |
|                 | B                                  | 3/0.129         | 2/0.0180      | 12/0.0415      | 17           |
|                 | E                                  | 229/0.9828      | 109/0.9820    | 277/0.9585     | 615          |
|                 | <b>Total</b>                       | <b>233</b>      | <b>111</b>    | <b>289</b>     | <b>633</b>   |

Table S25. GWAS hits for SNPs differentiated between Blue (West Africa, non-Bantu-associated) and mustard (East Africa/Bantu associated) ADMIXTURE clusters (K=9).

| Disease / Trait                                             | N.SNPs | SNP list (38) | F <sub>ST</sub> <sup>1</sup> |
|-------------------------------------------------------------|--------|---------------|------------------------------|
| <b>Cognitive performance</b>                                | 3      | rs2807580     | 0.0941                       |
|                                                             |        | rs2229741     | 0.0707                       |
|                                                             |        | rs4751674     | 0.0703                       |
| <b>Crohn's disease</b>                                      | 3      | rs7702331     | 0.0750                       |
|                                                             |        | rs7517847     | 0.0603                       |
|                                                             |        | rs6556412     | 0.0599                       |
| <b>Inflammatory bowel disease</b>                           | 3      | rs477515      | 0.1261                       |
|                                                             |        | rs2382817     | 0.0683                       |
|                                                             |        | rs7517847     | 0.0603                       |
| <b>Multiple sclerosis</b>                                   | 2      | rs12466022    | 0.0688                       |
|                                                             |        | rs533259      | 0.0688                       |
| <b>Obesity related</b>                                      | 2      | rs7964120     | 0.1322                       |
|                                                             |        | rs7784447     | 0.0957                       |
| <b>Emphysema-related traits</b>                             | 1      | rs641525      | 0.1469                       |
| <b>Epstein-Barr virus immune response</b>                   | 1      | rs477515      | 0.1261                       |
| <b>Liver enzyme levels</b>                                  | 1      | rs4547811     | 0.1108                       |
| <b>Schizophrenia</b>                                        | 1      | rs1635        | 0.0862                       |
| <b>Myopia (pathological)</b>                                | 1      | rs4142248     | 0.0825                       |
| <b>Alzheimer's disease</b>                                  | 1      | rs610932      | 0.0822                       |
| <b>F-cell distribution</b>                                  | 1      | rs7565301     | 0.0738                       |
| <b>Amyotrophic lateral sclerosis</b>                        | 1      | rs2819332     | 0.0726                       |
| <b>Menopause</b>                                            | 1      | rs11889862    | 0.0725                       |
| <b>Eosinophil counts</b>                                    | 1      | rs4143832     | 0.0719                       |
| <b>Obsessive-compulsive disorder</b>                        | 1      | rs9652236     | 0.0717                       |
| <b>HIV related</b>                                          | 1      | rs1020064     | 0.0716                       |
| <b>Sphingolipid levels</b>                                  | 1      | rs1000778     | 0.0689                       |
| <b>IgE levels in asthmatics</b>                             | 1      | rs10404342    | 0.0673                       |
| <b>Economic and political preferences</b>                   | 1      | rs210648      | 0.0667                       |
| <b>Bladder cancer</b>                                       | 1      | rs2294008     | 0.0660                       |
| <b>Duodenal ulcer</b>                                       | 1      | rs2294008     | 0.0660                       |
| <b>Nasopharyngeal carcinoma</b>                             | 1      | rs6774494     | 0.0660                       |
| <b>Non-alcoholic fatty liver disease histology</b>          | 1      | rs887304      | 0.0658                       |
| <b>Prostate cancer</b>                                      | 1      | rs4242382     | 0.0652                       |
| <b>Resp.to irinotecan/platinum-based chemo. lung cancer</b> | 1      | rs344924      | 0.0647                       |
| <b>Sudden cardiac arrest</b>                                | 1      | rs5762311     | 0.0637                       |
| <b>Type 1 diabetes</b>                                      | 1      | rs1004446     | 0.0634                       |
| <b>Bipolar disorder</b>                                     | 1      | rs7250872     | 0.0626                       |
| <b>Response to gemcitabine in pancreatic cancer</b>         | 1      | rs1901440     | 0.0625                       |
| <b>Mean platelet volume</b>                                 | 1      | rs12526480    | 0.0625                       |
| <b>Pancreatic cancer</b>                                    | 1      | rs10088262    | 0.0620                       |
| <b>Breast size</b>                                          | 1      | rs7104745     | 0.0612                       |

**Bold indicates unique entries and underline indicate co-occurrence in OMIM disease results.**

<sup>1</sup> The list is sorted by decreasing F<sub>ST</sub>.

Table S26 - Summary of the data after EPIGEN QC analysis.

|                                 | <b>EPIGEN – 30 Brazilians</b> |
|---------------------------------|-------------------------------|
| <b>Coverage</b>                 | 42.7x                         |
| <b>% Called genome fraction</b> | 93                            |
| <b>% mapped reads</b>           | 87.73                         |
| <b>% Array agreement</b>        | 99.27                         |
| <b>Omni2.5</b>                  |                               |
| <b>Ts/Tv</b>                    | 2.04                          |
| <b>% Array agreement</b>        | 99.53                         |
| <b>HumanOmni5</b>               |                               |
| <b>Total SNPs</b>               | <b>15,033,927</b>             |
| <b>Average of Indels/lenght</b> | 714,436 / (20-300)            |

Table S27. Definitions of functional categories of ANNOVAR.

| <b>Functional category</b> | <b>Definition</b>                                                                                                                       |
|----------------------------|-----------------------------------------------------------------------------------------------------------------------------------------|
| <b>Exonic</b>              | variant overlaps a coding exon, excluding the 5'UTR and 3'UTR                                                                           |
| <b>Synonymous</b>          | a single nucleotide change that does not cause an amino acid change                                                                     |
| <b>Non-synonymous</b>      | a single nucleotide change that cause an amino acid change                                                                              |
| <b>Stopgain</b>            | a SNV that lead to the immediate creation of stop codon at the variant site. This class is not included in the Non-synonymous class.    |
| <b>Stoploss</b>            | a SNV that lead to the immediate elimination of stop codon at the variant site. This class is not included in the Non-synonymous class. |
| <b>Unknown</b>             | unknown function (due to various errors in the gene structure definition in the database file)                                          |
| <b>Splicing</b>            | variant is within 2-bp of a splicing junction                                                                                           |
| <b>ncRNA</b>               | variant overlaps a transcript without coding annotation in the gene definition                                                          |
| <b>UTR5</b>                | variant overlaps a 5' untranslated region                                                                                               |
| <b>UTR3</b>                | variant overlaps a 3' untranslated region                                                                                               |
| <b>Intronic</b>            | variant overlaps an intron                                                                                                              |
| <b>Upstream</b>            | variant overlaps 1-kb region upstream of transcription start site                                                                       |
| <b>Downstream</b>          | variant overlaps 1-kb region downstream of transcription end site                                                                       |
| <b>Intergenic</b>          | variant is in intergenic region                                                                                                         |

\*Adapted from ANNOVAR website

([http://www.openbioinformatics.org/annovar/annovar\\_gene.html](http://www.openbioinformatics.org/annovar/annovar_gene.html))

Table S28. Proportion of synonymous and non-synonymous exonic SNPs in the 30 Brazilian genomes and in similar studies.

| <b>Study</b>                                    | <b># Samples</b> | <b>Coverage</b> | <b>% of Synonymous</b> | <b>% of Non-synonymous</b> |
|-------------------------------------------------|------------------|-----------------|------------------------|----------------------------|
| <b>EPIGEN – current study</b>                   | 30               | 42.7x           | 49.91                  | 47.88                      |
| <b>1000 Genomes Project et al.<sup>44</sup></b> | 1,092            | ~50x*           | 44.59                  | 50.63                      |
| <b>Lachance et al.<sup>57</sup></b>             | 15               | ~60x            | ~43.21                 | ~45.69                     |
| <b>Shen et al.<sup>58</sup></b>                 | 44               | 65.8x           | 45.80                  | 52.50                      |

\* coverage of exomes.

Table S29. Exonic SNPs classified by ANNOVAR in the 30 Brazilian genomes, based on RefSeq database.

| <b>Exonic</b>  | <b>Number of SNPs on the 30 samples</b> | <b>% of SNPs</b> |
|----------------|-----------------------------------------|------------------|
| Non-synonymous | 50518                                   | 49.91            |
| Synonymous     | 48464                                   | 47.88            |
| Stopgain       | 563                                     | 0.56             |
| Stoploss       | 45                                      | 0.05             |
| Unknown        | 1621                                    | 1.60             |
| Total          | 101211                                  | 100              |

Table S30. Exonic SNPs classified by VEP (Ensembl) in the 30 Brazilian genomes.

| <b>Exonic</b>   | <b>Number of SNPs on the 30 samples</b> | <b>% of SNPs</b> |
|-----------------|-----------------------------------------|------------------|
| Missense        | 58142                                   | 53.52            |
| Synonymous      | 49419                                   | 45.49            |
| Stop_gained     | 890                                     | 0.82             |
| Stop_lost       | 177                                     | 0.16             |
| Coding sequence | 6                                       | 0.01             |
| Total           | 108634                                  | 100              |

Table S31. Exonic SNPs classified by ANNOVAR in the 30 Brazilian genomes, based on the Ensembl transcripts database.

| Exonic         | Number of SNPs on the 30 samples | % of SNPs |
|----------------|----------------------------------|-----------|
| Non-synonymous | 57066                            | 51.68     |
| Synonymous     | 50516                            | 45.75     |
| Stopgain       | 841                              | 0.76      |
| Stoploss       | 137                              | 0.12      |
| Unknown        | 1857                             | 1.68      |
| Total          | 110417                           | 100       |

Table S32. CONDEL scores for the derived/non-reference and derived/reference SNPs from 30 genomes as a function of allele frequency classes.

| Allele frequency classes*         | # Variants analyzed by Condel | % Variants analyzed | Average Condel score | # Variants analyzed by Condel | % Variants analyzed | Average Condel score | Bias <sup>1</sup> |
|-----------------------------------|-------------------------------|---------------------|----------------------|-------------------------------|---------------------|----------------------|-------------------|
| <u>Derived/non-reference SNPs</u> |                               |                     |                      | <u>Derived/reference SNPs</u> |                     |                      |                   |
| <b>0 – 0.10</b>                   | 30171                         | 79.794              | 0.452                | 1361                          | 21.433              | 0.351                | 0.101             |
| <b>0.11 – 0.20</b>                | 3055                          | 8.080               | 0.430                | 573                           | 9.024               | 0.357                | 0.074             |
| <b>0.21 – 0.30</b>                | 1629                          | 4.308               | 0.426                | 527                           | 8.299               | 0.349                | 0.078             |
| <b>0.31 – 0.40</b>                | 1005                          | 2.658               | 0.424                | 404                           | 6.362               | 0.346                | 0.078             |
| <b>0.41 – 0.50</b>                | 740                           | 1.957               | 0.419                | 489                           | 7.701               | 0.347                | 0.073             |
| <b>0.51 – 0.60</b>                | 447                           | 1.182               | 0.420                | 496                           | 7.811               | 0.342                | 0.078             |
| <b>0.61 – 0.70</b>                | 298                           | 0.788               | 0.424                | 526                           | 8.283               | 0.350                | 0.074             |
| <b>0.71 – 0.80</b>                | 234                           | 0.619               | 0.410                | 476                           | 7.496               | 0.347                | 0.063             |
| <b>0.81 – 0.90</b>                | 137                           | 0.362               | 0.411                | 465                           | 7.323               | 0.348                | 0.063             |
| <b>0.91 – 1.0</b>                 | 95                            | 0.251               | 0.403                | 1033                          | 16.268              | 0.340                | 0.063             |
| <b>Total</b>                      | 37811                         | 100                 | -                    | 6350                          | 100                 | 0.347                | -                 |

\* In EPIGEN individuals

<sup>1</sup> Bias =  $\text{CONDEL score}_{\text{derived/non-reference}} - \text{CONDEL score}_{\text{derived/reference}}$
